# Supplementary material
Source: publisher figshare collection journal article supplement (https://karger.figshare.com/ndownloader/files/8342171)
Supplement: Supplementary file 1 [file 8342171]

## Sheet: Foglio1
Gene Symbol	Gene Name	Level of evidence	Reference
2003-09-01	septin 3	GWAS	Schizophrenia Working Group of the Psychiatric Genomics Consortium, (2014): Biological insights from 108 schizophrenia-associated genetic loci. Nature 511(7510):421-7.
AAK1	AP2 associated kinase 1	WES	Purcell et al., (2014): A polygenic burden of rare disruptive mutations in schizophrenia. Nature 506:185-190.
AARS	alanyl-tRNA synthetase	WES	Purcell et al., (2014): A polygenic burden of rare disruptive mutations in schizophrenia. Nature 506:185-190.
AATK	apoptosis-associated tyrosine kinase	WES	Purcell et al., (2014): A polygenic burden of rare disruptive mutations in schizophrenia. Nature 506:185-190.
ABCA13	ATP binding cassette subfamily A member 13	WES	Fromer et al.,, (2014): De novo mutations in schizophrenia implicate synaptic networks. Nature 506(7487):179-84.
ABCA2	ATP binding cassette subfamily A member 2	WES	Purcell et al., (2014): A polygenic burden of rare disruptive mutations in schizophrenia. Nature 506:185-190.
ABCA3	ATP binding cassette subfamily A member 3	WES	Purcell et al., (2014): A polygenic burden of rare disruptive mutations in schizophrenia. Nature 506:185-190.
ABCB9	ATP-binding cassette, sub-family B (MDR/TAP), member 9	GWAS	Schizophrenia Working Group of the Psychiatric Genomics Consortium, (2014): Biological insights from 108 schizophrenia-associated genetic loci. Nature 511(7510):421-7.	2661
ABCC1	ATP binding cassette subfamily C member 1	CNV-bearing	Luo et al.,, (2014): Systematic prioritization and integrative analysis of copy number variations in schizophrenia reveal key schizophrenia susceptibility genes. Schizophr Bull 40(6):1285-99.
ABCD3	ATP binding cassette subfamily D member 3	WES	Purcell et al., (2014): A polygenic burden of rare disruptive mutations in schizophrenia. Nature 506:185-190.
ABCG1	ATP binding cassette subfamily G member 1	WES	Purcell et al., (2014): A polygenic burden of rare disruptive mutations in schizophrenia. Nature 506:185-190.
ABCG4	ATP binding cassette subfamily G member 4	WES	Purcell et al., (2014): A polygenic burden of rare disruptive mutations in schizophrenia. Nature 506:185-190.
ABHD12	abhydrolase domain containing 12	WES	Fromer et al.,, (2014): De novo mutations in schizophrenia implicate synaptic networks. Nature 506(7487):179-84.
ABHD16A	abhydrolase domain containing 16A	methylation	Montano et al.,, (2016): Association of DNA Methylation Differences With Schizophrenia in an Epigenome-Wide Association Study. JAMA Psychiatry 73(5):506-14.
ABI1	abl interactor 1	WES	Purcell et al., (2014): A polygenic burden of rare disruptive mutations in schizophrenia. Nature 506:185-190.
ABI2	abl-interactor 2	WES	Purcell et al., (2014): A polygenic burden of rare disruptive mutations in schizophrenia. Nature 506:185-190.
ABL1	ABL proto-oncogene 1, non-receptor tyrosine kinase	WES	Fromer et al.,, (2014): De novo mutations in schizophrenia implicate synaptic networks. Nature 506(7487):179-84.
ABLIM1	actin binding LIM protein 1	WES	Purcell et al., (2014): A polygenic burden of rare disruptive mutations in schizophrenia. Nature 506:185-190.
ABR	active BCR-related	WES	Purcell et al., (2014): A polygenic burden of rare disruptive mutations in schizophrenia. Nature 506:185-190.
ACAP3	ArfGAP with coiled-coil, ankyrin repeat and PH domains 3	methylation	Montano et al.,, (2016): Association of DNA Methylation Differences With Schizophrenia in an Epigenome-Wide Association Study. JAMA Psychiatry 73(5):506-14.
ACBD5	acyl-CoA binding domain containing 5	WES	Purcell et al., (2014): A polygenic burden of rare disruptive mutations in schizophrenia. Nature 506:185-190.
ACCSL	1-aminocyclopropane-1-carboxylate synthase (inactive)-like	WES	Fromer et al.,, (2014): De novo mutations in schizophrenia implicate synaptic networks. Nature 506(7487):179-84.
ACD	adrenocortical dysplasia homolog (mouse)	GWAS	Schizophrenia Working Group of the Psychiatric Genomics Consortium, (2014): Biological insights from 108 schizophrenia-associated genetic loci. Nature 511(7510):421-7.
ACKR1	atypical chemokine receptor 1 (Duffy blood group)	linkage/association studies	Ng et al.,, (2009): Meta-analysis of 32 genome-wide linkage studies of schizophrenia. Mol Psychiatry 14(8):774-85.
ACLY	ATP citrate lyase	WES	Purcell et al., (2014): A polygenic burden of rare disruptive mutations in schizophrenia. Nature 506:185-190.
ACN9	succinate dehydrogenase complex assembly factor 3	WES	Fromer et al.,, (2014): De novo mutations in schizophrenia implicate synaptic networks. Nature 506(7487):179-84.
ACO1	aconitase 1	WES	Fromer et al.,, (2014): De novo mutations in schizophrenia implicate synaptic networks. Nature 506(7487):179-84.
ACO2	aconitase 2	WES	Purcell et al., (2014): A polygenic burden of rare disruptive mutations in schizophrenia. Nature 506:185-190.
ACOT6	acyl-CoA thioesterase 6	WES	Purcell et al., (2014): A polygenic burden of rare disruptive mutations in schizophrenia. Nature 506:185-190.
ACP1	acid phosphatase 1, soluble	WES	Purcell et al., (2014): A polygenic burden of rare disruptive mutations in schizophrenia. Nature 506:185-190.
ACP6	acid phosphatase 6, lysophosphatidic	CNV-bearing	Luo et al.,, (2014): Systematic prioritization and integrative analysis of copy number variations in schizophrenia reveal key schizophrenia susceptibility genes. Schizophr Bull 40(6):1285-99.
ACSL1	acyl-CoA synthetase long-chain family member 1	methylation	Aberg KA et al., (2014): Methylome-wide association study of schizophrenia: identifying blood biomarker signatures of environmental insults. JAMA Psychiatry 71(3):255-264.
ACSL3	acyl-CoA synthetase long-chain family member 3	WES	Purcell et al., (2014): A polygenic burden of rare disruptive mutations in schizophrenia. Nature 506:185-190.
ACSL4	acyl-CoA synthetase long-chain family member 4	WES	Fromer et al.,, (2014): De novo mutations in schizophrenia implicate synaptic networks. Nature 506(7487):179-84.
ACSL5	acyl-CoA synthetase long-chain family member 5	WES	Fromer et al.,, (2014): De novo mutations in schizophrenia implicate synaptic networks. Nature 506(7487):179-84.
ACSL6	acyl-CoA synthetase long-chain family member 6	linkage/association studies	Lewis et al.,, (2003): Genome scan meta-analysis of schizophrenia and bipolar disorder, part II: Schizophrenia. Am J Hum Genet 73(1):34-48.
ACSM2B	acyl-CoA synthetase medium-chain family member 2B	WES	Fromer et al.,, (2014): De novo mutations in schizophrenia implicate synaptic networks. Nature 506(7487):179-84.
ACTA2	actin, alpha 2, smooth muscle, aorta	WES	Fromer et al.,, (2014): De novo mutations in schizophrenia implicate synaptic networks. Nature 506(7487):179-84.
ACTB	actin, beta	WES	Purcell et al., (2014): A polygenic burden of rare disruptive mutations in schizophrenia. Nature 506:185-190.
ACTL7B	actin like 7B	WES	Fromer et al.,, (2014): De novo mutations in schizophrenia implicate synaptic networks. Nature 506(7487):179-84.
ACTN1	actinin alpha 1	WES	Fromer et al.,, (2014): De novo mutations in schizophrenia implicate synaptic networks. Nature 506(7487):179-84.
ACTN2	actinin alpha 2	WES	Purcell et al., (2014): A polygenic burden of rare disruptive mutations in schizophrenia. Nature 506:185-190.
ACTN4	actinin alpha 4	WES	Purcell et al., (2014): A polygenic burden of rare disruptive mutations in schizophrenia. Nature 506:185-190.
ACTR1A	ARP1 actin-related protein 1 homolog A, centractin alpha	WES	Purcell et al., (2014): A polygenic burden of rare disruptive mutations in schizophrenia. Nature 506:185-190.
ACTR1B	ARP1 actin-related protein 1 homolog B, centractin beta	WES	Purcell et al., (2014): A polygenic burden of rare disruptive mutations in schizophrenia. Nature 506:185-190.
ACTR2	ARP2 actin-related protein 2 homolog (yeast)	WES	Purcell et al., (2014): A polygenic burden of rare disruptive mutations in schizophrenia. Nature 506:185-190.
ACTR3	ARP3 actin-related protein 3 homolog (yeast)	WES	Purcell et al., (2014): A polygenic burden of rare disruptive mutations in schizophrenia. Nature 506:185-190.
ACTR5	ARP5 actin-related protein 5 homolog (yeast)	GWAS	Schizophrenia Working Group of the Psychiatric Genomics Consortium, (2014): Biological insights from 108 schizophrenia-associated genetic loci. Nature 511(7510):421-7.
ADAMTS1	ADAM metallopeptidase with thrombospondin type 1 motif 1	WES	Fromer et al.,, (2014): De novo mutations in schizophrenia implicate synaptic networks. Nature 506(7487):179-84.
ADAMTS10	ADAM metallopeptidase with thrombospondin type 1 motif 10	WES	Fromer et al.,, (2014): De novo mutations in schizophrenia implicate synaptic networks. Nature 506(7487):179-84.
ADAMTS3	ADAM metallopeptidase with thrombospondin type 1 motif 3	WES	Fromer et al.,, (2014): De novo mutations in schizophrenia implicate synaptic networks. Nature 506(7487):179-84.
ADAMTS6	ADAM metallopeptidase with thrombospondin type 1 motif 6	WES	Fromer et al.,, (2014): De novo mutations in schizophrenia implicate synaptic networks. Nature 506(7487):179-84.
ADAMTSL3	ADAMTS-like 3	GWAS	Schizophrenia Working Group of the Psychiatric Genomics Consortium, (2014): Biological insights from 108 schizophrenia-associated genetic loci. Nature 511(7510):421-7.
ADAP1	ArfGAP with dual PH domains 1	WES	Purcell et al., (2014): A polygenic burden of rare disruptive mutations in schizophrenia. Nature 506:185-190.
ADARB1	adenosine deaminase, RNA specific B1	WES	Purcell et al., (2014): A polygenic burden of rare disruptive mutations in schizophrenia. Nature 506:185-190.
ADCY1	adenylate cyclase 1 (brain)	WES	Purcell et al., (2014): A polygenic burden of rare disruptive mutations in schizophrenia. Nature 506:185-190.
ADCY5	adenylate cyclase 5	WES	Purcell et al., (2014): A polygenic burden of rare disruptive mutations in schizophrenia. Nature 506:185-190.
ADCY7	adenylate cyclase 7	WES	Fromer et al.,, (2014): De novo mutations in schizophrenia implicate synaptic networks. Nature 506(7487):179-84.
ADCYAP1	adenylate cyclase activating polypeptide 1 (pituitary)	functional genomics	Ayalew M et al., (2012): Convergent functional genomics of schizophrenia: from comprehensive understanding to genetic risk prediction. Mol Psychiatry 17(9):887-905.
ADD1	adducin 1	WES	Purcell et al., (2014): A polygenic burden of rare disruptive mutations in schizophrenia. Nature 506:185-190.
ADD2	adducin 2	WES	Purcell et al., (2014): A polygenic burden of rare disruptive mutations in schizophrenia. Nature 506:185-190.
ADD3	adducin 3	WES	Purcell et al., (2014): A polygenic burden of rare disruptive mutations in schizophrenia. Nature 506:185-190.
ADNP	activity-dependent neuroprotector homeobox	WES	Purcell et al., (2014): A polygenic burden of rare disruptive mutations in schizophrenia. Nature 506:185-190.
ADRA1A	adrenoceptor alpha 1A	linkage/association studies	Ng et al.,, (2009): Meta-analysis of 32 genome-wide linkage studies of schizophrenia. Mol Psychiatry 14(8):774-85.
ADRBK1	G protein-coupled receptor kinase 2	WES	Purcell et al., (2014): A polygenic burden of rare disruptive mutations in schizophrenia. Nature 506:185-190.
ADRBK2	adrenergic, beta, receptor kinase 2	GWAS	International Schizophrenia Consortium et al.,, (2009): Common polygenic variation contributes to risk of schizophrenia and bipolar disorder. Nature 460(7256):748-52.
AFAP1L1	actin filament associated protein 1-like 1	linkage/association studies	Ng et al.,, (2009): Meta-analysis of 32 genome-wide linkage studies of schizophrenia. Mol Psychiatry 14(8):774-85.
AFF3	AF4/FMR2 family member 3	methylation	Aberg KA et al., (2014): Methylome-wide association study of schizophrenia: identifying blood biomarker signatures of environmental insults. JAMA Psychiatry 71(3):255-264.
AFF4	AF4/FMR2 family member 4	WES	Purcell et al., (2014): A polygenic burden of rare disruptive mutations in schizophrenia. Nature 506:185-190.
AGAP1	ArfGAP with GTPase domain, ankyrin repeat and PH domain 1	methylation	Montano et al.,, (2016): Association of DNA Methylation Differences With Schizophrenia in an Epigenome-Wide Association Study. JAMA Psychiatry 73(5):506-14.
AGAP2	ArfGAP with GTPase domain, ankyrin repeat and PH domain 2	WES	Fromer et al.,, (2014): De novo mutations in schizophrenia implicate synaptic networks. Nature 506(7487):179-84.
AGAP3	ArfGAP with GTPase domain, ankyrin repeat and PH domain 3	WES	Purcell et al., (2014): A polygenic burden of rare disruptive mutations in schizophrenia. Nature 506:185-190.
AGO2	argonaute 2, RISC catalytic component	methylation	Montano et al.,, (2016): Association of DNA Methylation Differences With Schizophrenia in an Epigenome-Wide Association Study. JAMA Psychiatry 73(5):506-14.
AGPAT3	1-acylglycerol-3-phosphate O-acyltransferase 3	WES	Purcell et al., (2014): A polygenic burden of rare disruptive mutations in schizophrenia. Nature 506:185-190.
AGPHD1	hydroxylysine kinase	GWAS	Schizophrenia Working Group of the Psychiatric Genomics Consortium, (2014): Biological insights from 108 schizophrenia-associated genetic loci. Nature 511(7510):421-7.
AGRN	agrin	WES	Purcell et al., (2014): A polygenic burden of rare disruptive mutations in schizophrenia. Nature 506:185-190.
AGTPBP1	ATP/GTP binding protein 1	WES	Purcell et al., (2014): A polygenic burden of rare disruptive mutations in schizophrenia. Nature 506:185-190.
AHCYL1	adenosylhomocysteinase like 1	WES	Purcell et al., (2014): A polygenic burden of rare disruptive mutations in schizophrenia. Nature 506:185-190.
AHDC1	AT-hook DNA binding motif containing 1	WES	Fromer et al.,, (2014): De novo mutations in schizophrenia implicate synaptic networks. Nature 506(7487):179-84.
AHI1	Abelson helper integration site 1	linkage/association studies	Allen et al., (2008): Systematic meta-analyses and field synopsis of genetic association studies in schizophrenia: the SzGene database. Nat Genet 40(7):827-34.
AHNAK	AHNAK nucleoprotein	WES	Purcell et al., (2014): A polygenic burden of rare disruptive mutations in schizophrenia. Nature 506:185-190.
AHNAK2	AHNAK nucleoprotein 2	WES	Purcell et al., (2014): A polygenic burden of rare disruptive mutations in schizophrenia. Nature 506:185-190.
AK1	adenylate kinase 1	WES	Purcell et al., (2014): A polygenic burden of rare disruptive mutations in schizophrenia. Nature 506:185-190.
AK5	adenylate kinase 5	WES	Purcell et al., (2014): A polygenic burden of rare disruptive mutations in schizophrenia. Nature 506:185-190.
AKAP6	A-kinase anchoring protein 6	WES	Purcell et al., (2014): A polygenic burden of rare disruptive mutations in schizophrenia. Nature 506:185-190.
AKAP9	A-kinase anchoring protein 9	WES	Fromer et al.,, (2014): De novo mutations in schizophrenia implicate synaptic networks. Nature 506(7487):179-84.
AKD1	adenylate kinase 9	WES	Fromer et al.,, (2014): De novo mutations in schizophrenia implicate synaptic networks. Nature 506(7487):179-84.
AKR1A1	aldo-keto reductase family 1 member A1	WES	Purcell et al., (2014): A polygenic burden of rare disruptive mutations in schizophrenia. Nature 506:185-190.
AKR7A2	aldo-keto reductase family 7 member A2	WES	Purcell et al., (2014): A polygenic burden of rare disruptive mutations in schizophrenia. Nature 506:185-190.
AKT1	v-akt murine thymoma viral oncogene homolog 1	linkage/association studies	Allen et al., (2008): Systematic meta-analyses and field synopsis of genetic association studies in schizophrenia: the SzGene database. Nat Genet 40(7):827-34.
AKT3	v-akt murine thymoma viral oncogene homolog 3	GWAS	Ripke et al.,, (2013): Genome-wide association analysis identifies 13 new risk loci for schizophrenia. Nat Genet 45(10):1150-9.
AKTIP	AKT interacting protein	WES	Fromer et al.,, (2014): De novo mutations in schizophrenia implicate synaptic networks. Nature 506(7487):179-84.
ALAS1	5'-aminolevulinate synthase 1	WES	Fromer et al.,, (2014): De novo mutations in schizophrenia implicate synaptic networks. Nature 506(7487):179-84.
ALCAM	activated leukocyte cell adhesion molecule	WES	Fromer et al.,, (2014): De novo mutations in schizophrenia implicate synaptic networks. Nature 506(7487):179-84.
ALDH16A1	aldehyde dehydrogenase 16 family member A1	WES	Fromer et al.,, (2014): De novo mutations in schizophrenia implicate synaptic networks. Nature 506(7487):179-84.
ALDH1A1	aldehyde dehydrogenase 1 family, member A1	functional genomics	Ayalew M et al., (2012): Convergent functional genomics of schizophrenia: from comprehensive understanding to genetic risk prediction. Mol Psychiatry 17(9):887-905.
ALDH1L1	aldehyde dehydrogenase 1 family member L1	WES	Fromer et al.,, (2014): De novo mutations in schizophrenia implicate synaptic networks. Nature 506(7487):179-84.
ALDH1L2	aldehyde dehydrogenase 1 family member L2	WES	Fromer et al.,, (2014): De novo mutations in schizophrenia implicate synaptic networks. Nature 506(7487):179-84.
ALDH2	aldehyde dehydrogenase 2 family (mitochondrial)	WES	Purcell et al., (2014): A polygenic burden of rare disruptive mutations in schizophrenia. Nature 506:185-190.
ALDH5A1	aldehyde dehydrogenase 5 family member A1	WES	Fromer et al.,, (2014): De novo mutations in schizophrenia implicate synaptic networks. Nature 506(7487):179-84.
ALDH6A1	aldehyde dehydrogenase 6 family member A1	WES	Purcell et al., (2014): A polygenic burden of rare disruptive mutations in schizophrenia. Nature 506:185-190.
ALDH7A1	aldehyde dehydrogenase 7 family member A1	WES	Purcell et al., (2014): A polygenic burden of rare disruptive mutations in schizophrenia. Nature 506:185-190.
ALDOA	aldolase A, fructose-bisphosphate	GWAS	Schizophrenia Working Group of the Psychiatric Genomics Consortium, (2014): Biological insights from 108 schizophrenia-associated genetic loci. Nature 511(7510):421-7.
ALDOC	aldolase, fructose-bisphosphate C	WES	Purcell et al., (2014): A polygenic burden of rare disruptive mutations in schizophrenia. Nature 506:185-190.
ALMS1	Alstrom syndrome 1 (MOUSE) centrosome and basal body associated protein	sherlock integrative analysis (http://sherlock.ucsf.edu/)
ALOX15	arachidonate 15-lipoxygenase	WES	Fromer et al.,, (2014): De novo mutations in schizophrenia implicate synaptic networks. Nature 506(7487):179-84.
ALS2	ALS2, alsin Rho guanine nucleotide exchange factor	WES	Purcell et al., (2014): A polygenic burden of rare disruptive mutations in schizophrenia. Nature 506:185-190.
ALS2CL	ALS2 C-terminal like	WES	Purcell et al., (2014): A polygenic burden of rare disruptive mutations in schizophrenia. Nature 506:185-190.
AMBRA1	autophagy/beclin-1 regulator 1	GWAS	Rietschel et al.,, (2012): Association between genetic variation in a region on chromosome 11 and schizophrenia in large samples from Europe. Mol Psychiatry 17(9):906-17.
AMPH	amphiphysin	WES	Purcell et al., (2014): A polygenic burden of rare disruptive mutations in schizophrenia. Nature 506:185-190.
AMZ1	archaelysin family metallopeptidase 1	WES	Fromer et al.,, (2014): De novo mutations in schizophrenia implicate synaptic networks. Nature 506(7487):179-84.
ANAPC1	anaphase promoting complex subunit 1	WES	Purcell et al., (2014): A polygenic burden of rare disruptive mutations in schizophrenia. Nature 506:185-190.
ANAPC5	anaphase promoting complex subunit 5	WES	Fromer et al.,, (2014): De novo mutations in schizophrenia implicate synaptic networks. Nature 506(7487):179-84.
ANGPTL2	angiopoietin like 2	WES	Fromer et al.,, (2014): De novo mutations in schizophrenia implicate synaptic networks. Nature 506(7487):179-84.
ANK1	ankyrin 1	WES	Fromer et al.,, (2014): De novo mutations in schizophrenia implicate synaptic networks. Nature 506(7487):179-84.
ANK2	ankyrin 2, neuronal	WES	Purcell et al., (2014): A polygenic burden of rare disruptive mutations in schizophrenia. Nature 506:185-190.
ANK3	ankyrin 3, node of Ranvier (ankyrin G)	functional genomics	Ayalew M et al., (2012): Convergent functional genomics of schizophrenia: from comprehensive understanding to genetic risk prediction. Mol Psychiatry 17(9):887-905.
ANKFY1	ankyrin repeat and FYVE domain containing 1	WES	Purcell et al., (2014): A polygenic burden of rare disruptive mutations in schizophrenia. Nature 506:185-190.
ANKRD11	ankyrin repeat domain 11	WES	Fromer et al.,, (2014): De novo mutations in schizophrenia implicate synaptic networks. Nature 506(7487):179-84.
ANKRD17	ankyrin repeat domain 17	WES	Purcell et al., (2014): A polygenic burden of rare disruptive mutations in schizophrenia. Nature 506:185-190.
ANKRD22	ankyrin repeat domain 22	WES	Fromer et al.,, (2014): De novo mutations in schizophrenia implicate synaptic networks. Nature 506(7487):179-84.
ANKRD44	ankyrin repeat domain 44	GWAS	Schizophrenia Working Group of the Psychiatric Genomics Consortium, (2014): Biological insights from 108 schizophrenia-associated genetic loci. Nature 511(7510):421-7.
ANKRD50	ankyrin repeat domain 50	WES	Fromer et al.,, (2014): De novo mutations in schizophrenia implicate synaptic networks. Nature 506(7487):179-84.
ANKRD52	ankyrin repeat domain 52	WES	Purcell et al., (2014): A polygenic burden of rare disruptive mutations in schizophrenia. Nature 506:185-190.
ANKRD63	ankyrin repeat domain 63	GWAS	Schizophrenia Working Group of the Psychiatric Genomics Consortium, (2014): Biological insights from 108 schizophrenia-associated genetic loci. Nature 511(7510):421-7.
ANKRD66	ankyrin repeat domain 66	WES	Fromer et al.,, (2014): De novo mutations in schizophrenia implicate synaptic networks. Nature 506(7487):179-84.
ANKS1A	ankyrin repeat and sterile alpha motif domain containing 1A	WES	Fromer et al.,, (2014): De novo mutations in schizophrenia implicate synaptic networks. Nature 506(7487):179-84.
ANKS1B	ankyrin repeat and sterile alpha motif domain containing 1B	WES	Purcell et al., (2014): A polygenic burden of rare disruptive mutations in schizophrenia. Nature 506:185-190.
ANKS3	ankyrin repeat and sterile alpha motif domain containing 3	methylation	Montano et al.,, (2016): Association of DNA Methylation Differences With Schizophrenia in an Epigenome-Wide Association Study. JAMA Psychiatry 73(5):506-14.
ANO9	anoctamin 9	WES	Purcell et al., (2014): A polygenic burden of rare disruptive mutations in schizophrenia. Nature 506:185-190.
ANP32E	acidic (leucine-rich) nuclear phosphoprotein 32 family, member E	GWAS	Schizophrenia Working Group of the Psychiatric Genomics Consortium, (2014): Biological insights from 108 schizophrenia-associated genetic loci. Nature 511(7510):421-7.
ANXA2	annexin A2	WES	Purcell et al., (2014): A polygenic burden of rare disruptive mutations in schizophrenia. Nature 506:185-190.
ANXA5	annexin A5	WES	Purcell et al., (2014): A polygenic burden of rare disruptive mutations in schizophrenia. Nature 506:185-190.
ANXA6	annexin A6	WES	Purcell et al., (2014): A polygenic burden of rare disruptive mutations in schizophrenia. Nature 506:185-190.
AOX1	aldehyde oxidase 1	WES	Fromer et al.,, (2014): De novo mutations in schizophrenia implicate synaptic networks. Nature 506(7487):179-84.
AP1B1	adaptor related protein complex 1 beta 1 subunit	WES	Purcell et al., (2014): A polygenic burden of rare disruptive mutations in schizophrenia. Nature 506:185-190.
AP1S1	adaptor related protein complex 1 sigma 1 subunit	WES	Purcell et al., (2014): A polygenic burden of rare disruptive mutations in schizophrenia. Nature 506:185-190.
AP2A1	adaptor related protein complex 2 alpha 1 subunit	WES	Purcell et al., (2014): A polygenic burden of rare disruptive mutations in schizophrenia. Nature 506:185-190.
AP2A2	adaptor related protein complex 2 alpha 2 subunit	WES	Purcell et al., (2014): A polygenic burden of rare disruptive mutations in schizophrenia. Nature 506:185-190.
AP2B1	adaptor related protein complex 2 beta 1 subunit	WES	Purcell et al., (2014): A polygenic burden of rare disruptive mutations in schizophrenia. Nature 506:185-190.
AP2M1	adaptor related protein complex 2 mu 1 subunit	methylation	Montano et al.,, (2016): Association of DNA Methylation Differences With Schizophrenia in an Epigenome-Wide Association Study. JAMA Psychiatry 73(5):506-14.
AP2S1	adaptor related protein complex 2 sigma 1 subunit	WES	Purcell et al., (2014): A polygenic burden of rare disruptive mutations in schizophrenia. Nature 506:185-190.
AP3D1	adaptor related protein complex 3 delta 1 subunit	WES	Fromer et al.,, (2014): De novo mutations in schizophrenia implicate synaptic networks. Nature 506(7487):179-84.
APBA1	amyloid beta precursor protein binding family A member 1	WES	Purcell et al., (2014): A polygenic burden of rare disruptive mutations in schizophrenia. Nature 506:185-190.
APBB1	amyloid beta precursor protein binding family B member 1	WES	Purcell et al., (2014): A polygenic burden of rare disruptive mutations in schizophrenia. Nature 506:185-190.
APC	adenomatous polyposis coli	WES	Purcell et al., (2014): A polygenic burden of rare disruptive mutations in schizophrenia. Nature 506:185-190.
APC2	adenomatosis polyposis coli 2	WES	Purcell et al., (2014): A polygenic burden of rare disruptive mutations in schizophrenia. Nature 506:185-190.
APH1A	APH1A gamma secretase subunit	GWAS	Schizophrenia Working Group of the Psychiatric Genomics Consortium, (2014): Biological insights from 108 schizophrenia-associated genetic loci. Nature 511(7510):421-7.
APLP1	amyloid beta precursor like protein 1	WES	Purcell et al., (2014): A polygenic burden of rare disruptive mutations in schizophrenia. Nature 506:185-190.
APOD	apolipoprotein D	WES	Purcell et al., (2014): A polygenic burden of rare disruptive mutations in schizophrenia. Nature 506:185-190.
APOE	apolipoprotein E	linkage/association studies	Allen et al., (2008): Systematic meta-analyses and field synopsis of genetic association studies in schizophrenia: the SzGene database. Nat Genet 40(7):827-34.
APOL2	apolipoprotein L2	WES	Purcell et al., (2014): A polygenic burden of rare disruptive mutations in schizophrenia. Nature 506:185-190.
APOL5	apolipoprotein L5	WES	Fromer et al.,, (2014): De novo mutations in schizophrenia implicate synaptic networks. Nature 506(7487):179-84.
APOPT1	apoptogenic 1, mitochondrial	GWAS	Schizophrenia Working Group of the Psychiatric Genomics Consortium, (2014): Biological insights from 108 schizophrenia-associated genetic loci. Nature 511(7510):421-7.
APP	amyloid beta precursor protein	WES	Purcell et al., (2014): A polygenic burden of rare disruptive mutations in schizophrenia. Nature 506:185-190.
AQP4	aquaporin 4	WES	Purcell et al., (2014): A polygenic burden of rare disruptive mutations in schizophrenia. Nature 506:185-190.
AQP6	aquaporin 6	methylation	Aberg KA et al., (2014): Methylome-wide association study of schizophrenia: identifying blood biomarker signatures of environmental insults. JAMA Psychiatry 71(3):255-264.
AR	androgen receptor	linkage/association studies	Ng et al.,, (2009): Meta-analysis of 32 genome-wide linkage studies of schizophrenia. Mol Psychiatry 14(8):774-85.
ARAP1	ArfGAP with RhoGAP domain, ankyrin repeat and PH domain 1	WES	Fromer et al.,, (2014): De novo mutations in schizophrenia implicate synaptic networks. Nature 506(7487):179-84.
ARAP2	ArfGAP with RhoGAP domain, ankyrin repeat and PH domain 2	WES	Purcell et al., (2014): A polygenic burden of rare disruptive mutations in schizophrenia. Nature 506:185-190.
ARF3	ADP ribosylation factor 3	WES	Purcell et al., (2014): A polygenic burden of rare disruptive mutations in schizophrenia. Nature 506:185-190.
ARF5	ADP ribosylation factor 5	WES	Purcell et al., (2014): A polygenic burden of rare disruptive mutations in schizophrenia. Nature 506:185-190.
ARFGEF1	ADP ribosylation factor guanine nucleotide exchange factor 1	WES	Purcell et al., (2014): A polygenic burden of rare disruptive mutations in schizophrenia. Nature 506:185-190.
ARHGAP1	Rho GTPase activating protein 1	GWAS	Schizophrenia Working Group of the Psychiatric Genomics Consortium, (2014): Biological insights from 108 schizophrenia-associated genetic loci. Nature 511(7510):421-7.
ARHGAP15	Rho GTPase activating protein 15	methylation	Aberg KA et al., (2014): Methylome-wide association study of schizophrenia: identifying blood biomarker signatures of environmental insults. JAMA Psychiatry 71(3):255-264.
ARHGAP20	Rho GTPase activating protein 20	WES	Purcell et al., (2014): A polygenic burden of rare disruptive mutations in schizophrenia. Nature 506:185-190.
ARHGAP21	Rho GTPase activating protein 21	WES	Purcell et al., (2014): A polygenic burden of rare disruptive mutations in schizophrenia. Nature 506:185-190.
ARHGAP23	Rho GTPase activating protein 23	WES	Purcell et al., (2014): A polygenic burden of rare disruptive mutations in schizophrenia. Nature 506:185-190.
ARHGAP26	Rho GTPase activating protein 26	methylation	Aberg KA et al., (2014): Methylome-wide association study of schizophrenia: identifying blood biomarker signatures of environmental insults. JAMA Psychiatry 71(3):255-264.
ARHGAP32	Rho GTPase activating protein 32	WES	Purcell et al., (2014): A polygenic burden of rare disruptive mutations in schizophrenia. Nature 506:185-190.
ARHGAP33	Rho GTPase activating protein 33	WES	Fromer et al.,, (2014): De novo mutations in schizophrenia implicate synaptic networks. Nature 506(7487):179-84.
ARHGAP35	Rho GTPase activating protein 35	WES	Purcell et al., (2014): A polygenic burden of rare disruptive mutations in schizophrenia. Nature 506:185-190.
ARHGDIA	Rho GDP dissociation inhibitor alpha	WES	Purcell et al., (2014): A polygenic burden of rare disruptive mutations in schizophrenia. Nature 506:185-190.
ARHGEF10	Rho guanine nucleotide exchange factor 10	WES	Purcell et al., (2014): A polygenic burden of rare disruptive mutations in schizophrenia. Nature 506:185-190.
ARHGEF11	Rho guanine nucleotide exchange factor (GEF) 11	linkage/association studies	Ng et al.,, (2009): Meta-analysis of 32 genome-wide linkage studies of schizophrenia. Mol Psychiatry 14(8):774-85.
ARHGEF12	Rho guanine nucleotide exchange factor 12	WES	Purcell et al., (2014): A polygenic burden of rare disruptive mutations in schizophrenia. Nature 506:185-190.
ARHGEF15	Rho guanine nucleotide exchange factor 15	WES	Fromer et al.,, (2014): De novo mutations in schizophrenia implicate synaptic networks. Nature 506(7487):179-84.
ARHGEF17	Rho guanine nucleotide exchange factor 17	WES	Purcell et al., (2014): A polygenic burden of rare disruptive mutations in schizophrenia. Nature 506:185-190.
ARHGEF2	Rho/Rac guanine nucleotide exchange factor 2	WES	Purcell et al., (2014): A polygenic burden of rare disruptive mutations in schizophrenia. Nature 506:185-190.
ARHGEF38	Rho guanine nucleotide exchange factor 38	WES	Purcell et al., (2014): A polygenic burden of rare disruptive mutations in schizophrenia. Nature 506:185-190.
ARHGEF4	Rho guanine nucleotide exchange factor 4	WES	Purcell et al., (2014): A polygenic burden of rare disruptive mutations in schizophrenia. Nature 506:185-190.
ARHGEF7	Rho guanine nucleotide exchange factor 7	WES	Purcell et al., (2014): A polygenic burden of rare disruptive mutations in schizophrenia. Nature 506:185-190.
ARID1A	AT-rich interaction domain 1A	WES	Purcell et al., (2014): A polygenic burden of rare disruptive mutations in schizophrenia. Nature 506:185-190.
ARID1B	AT-rich interaction domain 1B	WES	Fromer et al.,, (2014): De novo mutations in schizophrenia implicate synaptic networks. Nature 506(7487):179-84.
ARID2	AT-rich interaction domain 2	WES	Fromer et al.,, (2014): De novo mutations in schizophrenia implicate synaptic networks. Nature 506(7487):179-84.
ARL3	ADP-ribosylation factor-like 3	GWAS	Schizophrenia Working Group of the Psychiatric Genomics Consortium, (2014): Biological insights from 108 schizophrenia-associated genetic loci. Nature 511(7510):421-7.
ARL6IP4	ADP-ribosylation factor-like 6 interacting protein 4	GWAS	Schizophrenia Working Group of the Psychiatric Genomics Consortium, (2014): Biological insights from 108 schizophrenia-associated genetic loci. Nature 511(7510):421-7.
ARNT	aryl hydrocarbon receptor nuclear translocator	linkage/association studies	Ng et al.,, (2009): Meta-analysis of 32 genome-wide linkage studies of schizophrenia. Mol Psychiatry 14(8):774-85.
ARNT2	aryl hydrocarbon receptor nuclear translocator 2	WES	Purcell et al., (2014): A polygenic burden of rare disruptive mutations in schizophrenia. Nature 506:185-190.
ARPC2	actin related protein 2/3 complex subunit 2	WES	Purcell et al., (2014): A polygenic burden of rare disruptive mutations in schizophrenia. Nature 506:185-190.
ARPC3	actin related protein 2/3 complex subunit 3	WES	Purcell et al., (2014): A polygenic burden of rare disruptive mutations in schizophrenia. Nature 506:185-190.
ARPP21	cAMP regulated phosphoprotein 21	WES	Purcell et al., (2014): A polygenic burden of rare disruptive mutations in schizophrenia. Nature 506:185-190.
ARRB1	arrestin beta 1	WES	Purcell et al., (2014): A polygenic burden of rare disruptive mutations in schizophrenia. Nature 506:185-190.
ARRDC1	arrestin domain containing 1	WES	Fromer et al.,, (2014): De novo mutations in schizophrenia implicate synaptic networks. Nature 506(7487):179-84.
ARSE	arylsulfatase E (chondrodysplasia punctata 1)	WES	Fromer et al.,, (2014): De novo mutations in schizophrenia implicate synaptic networks. Nature 506(7487):179-84.
ARSI	arylsulfatase family member I	WES	Fromer et al.,, (2014): De novo mutations in schizophrenia implicate synaptic networks. Nature 506(7487):179-84.
ARVCF	armadillo repeat gene deleted in velocardiofacial syndrome	linkage/association studies	Lewis et al.,, (2003): Genome scan meta-analysis of schizophrenia and bipolar disorder, part II: Schizophrenia. Am J Hum Genet 73(1):34-48.
AS3MT	arsenite methyltransferase	GWAS	Ripke et al.,, (2013): Genome-wide association analysis identifies 13 new risk loci for schizophrenia. Nat Genet 45(10):1150-9.
ASAP1	ArfGAP with SH3 domain, ankyrin repeat and PH domain 1	WES	Fromer et al.,, (2014): De novo mutations in schizophrenia implicate synaptic networks. Nature 506(7487):179-84.
ASH1L	ASH1 like histone lysine methyltransferase	WES	Fromer et al.,, (2014): De novo mutations in schizophrenia implicate synaptic networks. Nature 506(7487):179-84.
ASPHD1	aspartate beta-hydroxylase domain containing 1	GWAS	Schizophrenia Working Group of the Psychiatric Genomics Consortium, (2014): Biological insights from 108 schizophrenia-associated genetic loci. Nature 511(7510):421-7.
ASPRV1	aspartic peptidase, retroviral-like 1	methylation	Aberg KA et al., (2014): Methylome-wide association study of schizophrenia: identifying blood biomarker signatures of environmental insults. JAMA Psychiatry 71(3):255-264.
ASTL	astacin-like metallo-endopeptidase (M12 family)	WES	Fromer et al.,, (2014): De novo mutations in schizophrenia implicate synaptic networks. Nature 506(7487):179-84.
ASXL1	additional sex combs like 1, transcriptional regulator	WES	Fromer et al.,, (2014): De novo mutations in schizophrenia implicate synaptic networks. Nature 506(7487):179-84.
ATF7IP	activating transcription factor 7 interacting protein	WES	Purcell et al., (2014): A polygenic burden of rare disruptive mutations in schizophrenia. Nature 506:185-190.
ATG12	autophagy related 12	WES	Fromer et al.,, (2014): De novo mutations in schizophrenia implicate synaptic networks. Nature 506(7487):179-84.
ATG13	autophagy related 13	GWAS	Schizophrenia Working Group of the Psychiatric Genomics Consortium, (2014): Biological insights from 108 schizophrenia-associated genetic loci. Nature 511(7510):421-7.
ATG2A	autophagy related 2A	WES	Purcell et al., (2014): A polygenic burden of rare disruptive mutations in schizophrenia. Nature 506:185-190.
ATG2B	autophagy related 2B	WES	Purcell et al., (2014): A polygenic burden of rare disruptive mutations in schizophrenia. Nature 506:185-190.
ATG9A	autophagy related 9A	WES	Purcell et al., (2014): A polygenic burden of rare disruptive mutations in schizophrenia. Nature 506:185-190.
ATIC	5-aminoimidazole-4-carboxamide ribonucleotide formyltransferase/IMP cyclohydrolase	WES	Purcell et al., (2014): A polygenic burden of rare disruptive mutations in schizophrenia. Nature 506:185-190.
ATMIN	ATM interactor	WES	Purcell et al., (2014): A polygenic burden of rare disruptive mutations in schizophrenia. Nature 506:185-190.
ATN1	atrophin 1	WES	Purcell et al., (2014): A polygenic burden of rare disruptive mutations in schizophrenia. Nature 506:185-190.
ATP13A2	ATPase 13A2	WES	Purcell et al., (2014): A polygenic burden of rare disruptive mutations in schizophrenia. Nature 506:185-190.
ATP1A1	ATPase Na+/K+ transporting subunit alpha 1	WES	Purcell et al., (2014): A polygenic burden of rare disruptive mutations in schizophrenia. Nature 506:185-190.
ATP1A2	ATPase Na+/K+ transporting subunit alpha 2	WES	Purcell et al., (2014): A polygenic burden of rare disruptive mutations in schizophrenia. Nature 506:185-190.
ATP1A3	ATPase Na+/K+ transporting subunit alpha 3	WES	Purcell et al., (2014): A polygenic burden of rare disruptive mutations in schizophrenia. Nature 506:185-190.
ATP1B1	ATPase Na+/K+ transporting subunit beta 1	WES	Purcell et al., (2014): A polygenic burden of rare disruptive mutations in schizophrenia. Nature 506:185-190.
ATP1B2	ATPase Na+/K+ transporting subunit beta 2	WES	Purcell et al., (2014): A polygenic burden of rare disruptive mutations in schizophrenia. Nature 506:185-190.
ATP2A2	ATPase, Ca++ transporting, cardiac muscle, slow twitch 2	GWAS	Schizophrenia Working Group of the Psychiatric Genomics Consortium, (2014): Biological insights from 108 schizophrenia-associated genetic loci. Nature 511(7510):421-7.
ATP2B1	ATPase plasma membrane Ca2+ transporting 1	WES	Purcell et al., (2014): A polygenic burden of rare disruptive mutations in schizophrenia. Nature 506:185-190.
ATP2B2	ATPase plasma membrane Ca2+ transporting 2	WES	Fromer et al.,, (2014): De novo mutations in schizophrenia implicate synaptic networks. Nature 506(7487):179-84.
ATP2B3	ATPase plasma membrane Ca2+ transporting 3	WES	Purcell et al., (2014): A polygenic burden of rare disruptive mutations in schizophrenia. Nature 506:185-190.
ATP2B4	ATPase plasma membrane Ca2+ transporting 4	WES	Purcell et al., (2014): A polygenic burden of rare disruptive mutations in schizophrenia. Nature 506:185-190.
ATP5A1	ATP synthase, H+ transporting, mitochondrial F1 complex, alpha subunit 1, cardiac muscle	WES	Purcell et al., (2014): A polygenic burden of rare disruptive mutations in schizophrenia. Nature 506:185-190.
ATP5B	ATP synthase, H+ transporting, mitochondrial F1 complex, beta polypeptide	WES	Purcell et al., (2014): A polygenic burden of rare disruptive mutations in schizophrenia. Nature 506:185-190.
ATP5D	ATP synthase, H+ transporting, mitochondrial F1 complex, delta subunit	WES	Purcell et al., (2014): A polygenic burden of rare disruptive mutations in schizophrenia. Nature 506:185-190.
ATP5G2P3	ATP synthase, H+ transporting, mitochondrial Fo complex, subunit C2 (subunit 9) pseudogene 3	GWAS	Schizophrenia Working Group of the Psychiatric Genomics Consortium, (2014): Biological insights from 108 schizophrenia-associated genetic loci. Nature 511(7510):421-7.
ATP5I	ATP synthase, H+ transporting, mitochondrial Fo complex subunit E	WES	Purcell et al., (2014): A polygenic burden of rare disruptive mutations in schizophrenia. Nature 506:185-190.
ATP5J2-PTCD1,PTCD1	-	WES	Fromer et al.,, (2014): De novo mutations in schizophrenia implicate synaptic networks. Nature 506(7487):179-84.
ATP5O	ATP synthase, H+ transporting, mitochondrial F1 complex, O subunit	WES	Purcell et al., (2014): A polygenic burden of rare disruptive mutations in schizophrenia. Nature 506:185-190.
ATP6V0A1	ATPase H+ transporting V0 subunit a1	WES	Purcell et al., (2014): A polygenic burden of rare disruptive mutations in schizophrenia. Nature 506:185-190.
ATP6V0D1	ATPase H+ transporting V0 subunit d1	WES	Purcell et al., (2014): A polygenic burden of rare disruptive mutations in schizophrenia. Nature 506:185-190.
ATP6V1A	ATPase H+ transporting V1 subunit A	WES	Purcell et al., (2014): A polygenic burden of rare disruptive mutations in schizophrenia. Nature 506:185-190.
ATP6V1B2	ATPase H+ transporting V1 subunit B2	WES	Purcell et al., (2014): A polygenic burden of rare disruptive mutations in schizophrenia. Nature 506:185-190.
ATP6V1C1	ATPase H+ transporting V1 subunit C1	WES	Purcell et al., (2014): A polygenic burden of rare disruptive mutations in schizophrenia. Nature 506:185-190.
ATP6V1D	ATPase H+ transporting V1 subunit D	WES	Purcell et al., (2014): A polygenic burden of rare disruptive mutations in schizophrenia. Nature 506:185-190.
ATP6V1E1	ATPase H+ transporting V1 subunit E1	WES	Purcell et al., (2014): A polygenic burden of rare disruptive mutations in schizophrenia. Nature 506:185-190.
ATP6V1G2	ATPase H+ transporting V1 subunit G2	WES	Purcell et al., (2014): A polygenic burden of rare disruptive mutations in schizophrenia. Nature 506:185-190.
ATP6V1H	ATPase H+ transporting V1 subunit H	WES	Purcell et al., (2014): A polygenic burden of rare disruptive mutations in schizophrenia. Nature 506:185-190.
ATP8A1	ATPase phospholipid transporting 8A1	WES	Purcell et al., (2014): A polygenic burden of rare disruptive mutations in schizophrenia. Nature 506:185-190.
ATP9A	ATPase phospholipid transporting 9A (putative)	WES	Purcell et al., (2014): A polygenic burden of rare disruptive mutations in schizophrenia. Nature 506:185-190.
ATPAF2	ATP synthase mitochondrial F1 complex assembly factor 2	GWAS	Schizophrenia Working Group of the Psychiatric Genomics Consortium, (2014): Biological insights from 108 schizophrenia-associated genetic loci. Nature 511(7510):421-7.
ATXN1	ataxin 1	WES	Purcell et al., (2014): A polygenic burden of rare disruptive mutations in schizophrenia. Nature 506:185-190.
ATXN2L	ataxin 2 like	WES	Fromer et al.,, (2014): De novo mutations in schizophrenia implicate synaptic networks. Nature 506(7487):179-84.
ATXN7	ataxin 7	GWAS	Schizophrenia Working Group of the Psychiatric Genomics Consortium, (2014): Biological insights from 108 schizophrenia-associated genetic loci. Nature 511(7510):421-7.
AUH	AU RNA binding methylglutaconyl-CoA hydratase	methylation	Montano et al.,, (2016): Association of DNA Methylation Differences With Schizophrenia in an Epigenome-Wide Association Study. JAMA Psychiatry 73(5):506-14.
AUP1	ancient ubiquitous protein 1	methylation	Montano et al.,, (2016): Association of DNA Methylation Differences With Schizophrenia in an Epigenome-Wide Association Study. JAMA Psychiatry 73(5):506-14.
AUTS2	autism susceptibility candidate 2	methylation	Montano et al.,, (2016): Association of DNA Methylation Differences With Schizophrenia in an Epigenome-Wide Association Study. JAMA Psychiatry 73(5):506-14.
AXL	AXL receptor tyrosine kinase	WES	Fromer et al.,, (2014): De novo mutations in schizophrenia implicate synaptic networks. Nature 506(7487):179-84.
B3GAT1	beta-1,3-glucuronyltransferase 1	WES	Purcell et al., (2014): A polygenic burden of rare disruptive mutations in schizophrenia. Nature 506:185-190.
B3GNT7	UDP-GlcNAc:betaGal beta-1,3-N-acetylglucosaminyltransferase 7	methylation	Montano et al.,, (2016): Association of DNA Methylation Differences With Schizophrenia in an Epigenome-Wide Association Study. JAMA Psychiatry 73(5):506-14.
BAG3	BCL2 associated athanogene 3	WES	Purcell et al., (2014): A polygenic burden of rare disruptive mutations in schizophrenia. Nature 506:185-190.
BAG5	BCL2-associated athanogene 5	GWAS	Schizophrenia Working Group of the Psychiatric Genomics Consortium, (2014): Biological insights from 108 schizophrenia-associated genetic loci. Nature 511(7510):421-7.
BAI1	adhesion G protein-coupled receptor B1	WES	Purcell et al., (2014): A polygenic burden of rare disruptive mutations in schizophrenia. Nature 506:185-190.
BAI2	adhesion G protein-coupled receptor B2	WES	Purcell et al., (2014): A polygenic burden of rare disruptive mutations in schizophrenia. Nature 506:185-190.
BAIAP2	BAI1 associated protein 2	WES	Fromer et al.,, (2014): De novo mutations in schizophrenia implicate synaptic networks. Nature 506(7487):179-84.
BAIAP3	BAI1 associated protein 3	WES	Fromer et al.,, (2014): De novo mutations in schizophrenia implicate synaptic networks. Nature 506(7487):179-84.
BAP1	BRCA1 associated protein 1	WES	Purcell et al., (2014): A polygenic burden of rare disruptive mutations in schizophrenia. Nature 506:185-190.
BASP1	brain abundant membrane attached signal protein 1	WES	Purcell et al., (2014): A polygenic burden of rare disruptive mutations in schizophrenia. Nature 506:185-190.
BASP1P1	brain abundant, membrane attached signal protein 1 pseudogene 1	methylation	Montano et al.,, (2016): Association of DNA Methylation Differences With Schizophrenia in an Epigenome-Wide Association Study. JAMA Psychiatry 73(5):506-14.
BAZ2A	bromodomain adjacent to zinc finger domain 2A	WES	Purcell et al., (2014): A polygenic burden of rare disruptive mutations in schizophrenia. Nature 506:185-190.
BCAN	brevican	linkage/association studies	Ng et al.,, (2009): Meta-analysis of 32 genome-wide linkage studies of schizophrenia. Mol Psychiatry 14(8):774-85.
BCAR3	breast cancer anti-estrogen resistance 3	WES	Fromer et al.,, (2014): De novo mutations in schizophrenia implicate synaptic networks. Nature 506(7487):179-84.
BCAT1	branched chain amino acid transaminase 1	WES	Fromer et al.,, (2014): De novo mutations in schizophrenia implicate synaptic networks. Nature 506(7487):179-84.
BCL11B	B-cell CLL/lymphoma 11B (zinc finger protein)	GWAS	Schizophrenia Working Group of the Psychiatric Genomics Consortium, (2014): Biological insights from 108 schizophrenia-associated genetic loci. Nature 511(7510):421-7.
BCL9	B-cell CLL/lymphoma 9	GWAS	Li et al.,, (2011): Common variants in the BCL9 gene conferring risk of schizophrenia. Arch Gen Psychiatry 68(3):232-40.
BCL9	B-cell CLL/lymphoma 9-like	CNV-bearing	Luo et al.,, (2014): Systematic prioritization and integrative analysis of copy number variations in schizophrenia reveal key schizophrenia susceptibility genes. Schizophr Bull 40(6):1285-99.
BCL9L	B-cell CLL/lymphoma 9-like	WES	Purcell et al., (2014): A polygenic burden of rare disruptive mutations in schizophrenia. Nature 506:185-190.
BCORL1	BCL6 corepressor-like 1	WES	Purcell et al., (2014): A polygenic burden of rare disruptive mutations in schizophrenia. Nature 506:185-190.
BCR	BCR, RhoGEF and GTPase activating protein	WES	Purcell et al., (2014): A polygenic burden of rare disruptive mutations in schizophrenia. Nature 506:185-190.
BDNF	brain-derived neurotrophic factor	functional genomics	Ayalew M et al., (2012): Convergent functional genomics of schizophrenia: from comprehensive understanding to genetic risk prediction. Mol Psychiatry 17(9):887-905.
BIN1	bridging integrator 1	WES	Purcell et al., (2014): A polygenic burden of rare disruptive mutations in schizophrenia. Nature 506:185-190.
BIRC6	baculoviral IAP repeat containing 6	WES	Purcell et al., (2014): A polygenic burden of rare disruptive mutations in schizophrenia. Nature 506:185-190.
BLVRB	biliverdin reductase B	WES	Purcell et al., (2014): A polygenic burden of rare disruptive mutations in schizophrenia. Nature 506:185-190.
BMPR1B	bone morphogenetic protein receptor type 1B	methylation	Aberg KA et al., (2014): Methylome-wide association study of schizophrenia: identifying blood biomarker signatures of environmental insults. JAMA Psychiatry 71(3):255-264.
BMPR2	bone morphogenetic protein receptor type 2	WES	Purcell et al., (2014): A polygenic burden of rare disruptive mutations in schizophrenia. Nature 506:185-190.
BOLL	boule-like RNA-binding protein	GWAS	Schizophrenia Working Group of the Psychiatric Genomics Consortium, (2014): Biological insights from 108 schizophrenia-associated genetic loci. Nature 511(7510):421-7.
BPTF	bromodomain PHD finger transcription factor	WES	Purcell et al., (2014): A polygenic burden of rare disruptive mutations in schizophrenia. Nature 506:185-190.
BRD4	bromodomain containing 4	methylation	Aberg KA et al., (2014): Methylome-wide association study of schizophrenia: identifying blood biomarker signatures of environmental insults. JAMA Psychiatry 71(3):255-264.
BRP44	mitochondrial pyruvate carrier 2	GWAS	Schizophrenia Working Group of the Psychiatric Genomics Consortium, (2014): Biological insights from 108 schizophrenia-associated genetic loci. Nature 511(7510):421-7.
BRP44L- MPC1	mitochondrial pyruvate carrier 1	methylation	Aberg KA et al., (2014): Methylome-wide association study of schizophrenia: identifying blood biomarker signatures of environmental insults. JAMA Psychiatry 71(3):255-264.
BRPF1	bromodomain and PHD finger containing 1	WES	Fromer et al.,, (2014): De novo mutations in schizophrenia implicate synaptic networks. Nature 506(7487):179-84.
BRSK1	BR serine/threonine kinase 1	WES	Fromer et al.,, (2014): De novo mutations in schizophrenia implicate synaptic networks. Nature 506(7487):179-84.
BRSK2	BR serine/threonine kinase 2	WES	Purcell et al., (2014): A polygenic burden of rare disruptive mutations in schizophrenia. Nature 506:185-190.
BSN	bassoon presynaptic cytomatrix protein	WES	Purcell et al., (2014): A polygenic burden of rare disruptive mutations in schizophrenia. Nature 506:185-190.
BTBD10	BTB domain containing 10	methylation	Montano et al.,, (2016): Association of DNA Methylation Differences With Schizophrenia in an Epigenome-Wide Association Study. JAMA Psychiatry 73(5):506-14.
BTBD18	BTB (POZ) domain containing 18	GWAS	Schizophrenia Working Group of the Psychiatric Genomics Consortium, (2014): Biological insights from 108 schizophrenia-associated genetic loci. Nature 511(7510):421-7.
BTNL2	butyrophilin like 2	WES	Fromer et al.,, (2014): De novo mutations in schizophrenia implicate synaptic networks. Nature 506(7487):179-84.
BZRAP1	TSPO associated protein 1	WES	Fromer et al.,, (2014): De novo mutations in schizophrenia implicate synaptic networks. Nature 506(7487):179-84.
C10orf32	chromosome 10 open reading frame 32	GWAS	Schizophrenia Working Group of the Psychiatric Genomics Consortium, (2014): Biological insights from 108 schizophrenia-associated genetic loci. Nature 511(7510):421-7.
C10orf35	chromosome 10 open reading frame 35	WES	Purcell et al., (2014): A polygenic burden of rare disruptive mutations in schizophrenia. Nature 506:185-190.
C11orf31	chromosome 11 open reading frame 31	GWAS	Schizophrenia Working Group of the Psychiatric Genomics Consortium, (2014): Biological insights from 108 schizophrenia-associated genetic loci. Nature 511(7510):421-7.
C11orf87	chromosome 11 open reading frame 87	GWAS	Schizophrenia Working Group of the Psychiatric Genomics Consortium, (2014): Biological insights from 108 schizophrenia-associated genetic loci. Nature 511(7510):421-7.
C12orf42	chromosome 12 open reading frame 42	GWAS	Schizophrenia Working Group of the Psychiatric Genomics Consortium, (2014): Biological insights from 108 schizophrenia-associated genetic loci. Nature 511(7510):421-7.
C12orf65	chromosome 12 open reading frame 65	GWAS	Schizophrenia Working Group of the Psychiatric Genomics Consortium, (2014): Biological insights from 108 schizophrenia-associated genetic loci. Nature 511(7510):421-7.
C12orf74	chromosome 12 open reading frame 74	WES	Fromer et al.,, (2014): De novo mutations in schizophrenia implicate synaptic networks. Nature 506(7487):179-84.
C12orf79	chromosome 12 open reading frame 79	GWAS	Schizophrenia Working Group of the Psychiatric Genomics Consortium, (2014): Biological insights from 108 schizophrenia-associated genetic loci. Nature 511(7510):421-7.
C14orf28	chromosome 14 open reading frame 28	WES	Fromer et al.,, (2014): De novo mutations in schizophrenia implicate synaptic networks. Nature 506(7487):179-84.
C16orf62	chromosome 16 open reading frame 62	WES	Purcell et al., (2014): A polygenic burden of rare disruptive mutations in schizophrenia. Nature 506:185-190.
C16orf86	chromosome 16 open reading frame 86	GWAS	Schizophrenia Working Group of the Psychiatric Genomics Consortium, (2014): Biological insights from 108 schizophrenia-associated genetic loci. Nature 511(7510):421-7.
C16orf92	chromosome 16 open reading frame 92	GWAS	Schizophrenia Working Group of the Psychiatric Genomics Consortium, (2014): Biological insights from 108 schizophrenia-associated genetic loci. Nature 511(7510):421-7.
C17orf49	chromosome 17 open reading frame 49	WES	Purcell et al., (2014): A polygenic burden of rare disruptive mutations in schizophrenia. Nature 506:185-190.
C17orf97	chromosome 17 open reading frame 97	WES	Fromer et al.,, (2014): De novo mutations in schizophrenia implicate synaptic networks. Nature 506(7487):179-84.
C1orf132	chromosome 1 open reading frame 132	GWAS	Schizophrenia Working Group of the Psychiatric Genomics Consortium, (2014): Biological insights from 108 schizophrenia-associated genetic loci. Nature 511(7510):421-7.
C1orf185	chromosome 1 open reading frame 185	WES	Purcell et al., (2014): A polygenic burden of rare disruptive mutations in schizophrenia. Nature 506:185-190.
C1orf228	chromosome 1 open reading frame 228	methylation	Montano et al.,, (2016): Association of DNA Methylation Differences With Schizophrenia in an Epigenome-Wide Association Study. JAMA Psychiatry 73(5):506-14.
C1orf51	circadian associated repressor of transcription	GWAS	Schizophrenia Working Group of the Psychiatric Genomics Consortium, (2014): Biological insights from 108 schizophrenia-associated genetic loci. Nature 511(7510):421-7.
C1orf54	chromosome 1 open reading frame 54	GWAS	Schizophrenia Working Group of the Psychiatric Genomics Consortium, (2014): Biological insights from 108 schizophrenia-associated genetic loci. Nature 511(7510):421-7.
C1QC	complement component 1, q subcomponent, C chain	WES	Purcell et al., (2014): A polygenic burden of rare disruptive mutations in schizophrenia. Nature 506:185-190.
C20orf197	chromosome 20 open reading frame 197	WES	Fromer et al.,, (2014): De novo mutations in schizophrenia implicate synaptic networks. Nature 506(7487):179-84.
C2CD2L	C2CD2 like	WES	Purcell et al., (2014): A polygenic burden of rare disruptive mutations in schizophrenia. Nature 506:185-190.
C2orf47	chromosome 2 open reading frame 47	GWAS	Schizophrenia Working Group of the Psychiatric Genomics Consortium, (2014): Biological insights from 108 schizophrenia-associated genetic loci. Nature 511(7510):421-7.
C2orf69	chromosome 2 open reading frame 69	GWAS	Schizophrenia Working Group of the Psychiatric Genomics Consortium, (2014): Biological insights from 108 schizophrenia-associated genetic loci. Nature 511(7510):421-7.
C2orf82	chromosome 2 open reading frame 82	GWAS	Schizophrenia Working Group of the Psychiatric Genomics Consortium, (2014): Biological insights from 108 schizophrenia-associated genetic loci. Nature 511(7510):421-7.
C3	complement component 3	linkage/association studies	Lewis et al.,, (2003): Genome scan meta-analysis of schizophrenia and bipolar disorder, part II: Schizophrenia. Am J Hum Genet 73(1):34-48.
C3orf49	chromosome 3 open reading frame 49	GWAS	Schizophrenia Working Group of the Psychiatric Genomics Consortium, (2014): Biological insights from 108 schizophrenia-associated genetic loci. Nature 511(7510):421-7.
C4B	complement component 4B (Chido blood group)	linkage/association studies	Lewis et al.,, (2003): Genome scan meta-analysis of schizophrenia and bipolar disorder, part II: Schizophrenia. Am J Hum Genet 73(1):34-48.
C4orf27	chromosome 4 open reading frame 27	GWAS	Schizophrenia Working Group of the Psychiatric Genomics Consortium, (2014): Biological insights from 108 schizophrenia-associated genetic loci. Nature 511(7510):421-7.
C6orf136	chromosome 6 open reading frame 136	methylation	Montano et al.,, (2016): Association of DNA Methylation Differences With Schizophrenia in an Epigenome-Wide Association Study. JAMA Psychiatry 73(5):506-14.
C6orf222	chromosome 6 open reading frame 222	WES	Fromer et al.,, (2014): De novo mutations in schizophrenia implicate synaptic networks. Nature 506(7487):179-84.
C7orf60	base methyltransferase of 25S rRNA 2 homolog	WES	Fromer et al.,, (2014): De novo mutations in schizophrenia implicate synaptic networks. Nature 506(7487):179-84.
C9orf114	chromosome 9 open reading frame 114	WES	Fromer et al.,, (2014): De novo mutations in schizophrenia implicate synaptic networks. Nature 506(7487):179-84.
C9orf172	chromosome 9 open reading frame 172	WES	Purcell et al., (2014): A polygenic burden of rare disruptive mutations in schizophrenia. Nature 506:185-190.
CA10	carbonic anhydrase 10	WES	Fromer et al.,, (2014): De novo mutations in schizophrenia implicate synaptic networks. Nature 506(7487):179-84.
CA14	carbonic anhydrase XIV	GWAS	Schizophrenia Working Group of the Psychiatric Genomics Consortium, (2014): Biological insights from 108 schizophrenia-associated genetic loci. Nature 511(7510):421-7.
CA2	carbonic anhydrase 2	WES	Purcell et al., (2014): A polygenic burden of rare disruptive mutations in schizophrenia. Nature 506:185-190.
CA4	carbonic anhydrase 4	WES	Purcell et al., (2014): A polygenic burden of rare disruptive mutations in schizophrenia. Nature 506:185-190.
CA8	carbonic anhydrase VIII	GWAS	Schizophrenia Working Group of the Psychiatric Genomics Consortium, (2014): Biological insights from 108 schizophrenia-associated genetic loci. Nature 511(7510):421-7.
CABIN1	calcineurin binding protein 1	WES	Fromer et al.,, (2014): De novo mutations in schizophrenia implicate synaptic networks. Nature 506(7487):179-84.
CACNA1A	calcium voltage-gated channel subunit alpha1 A	WES	Purcell et al., (2014): A polygenic burden of rare disruptive mutations in schizophrenia. Nature 506:185-190.
CACNA1B	calcium voltage-gated channel subunit alpha1 B	WES	Purcell et al., (2014): A polygenic burden of rare disruptive mutations in schizophrenia. Nature 506:185-190.
CACNA1C	calcium channel, voltage-dependent, L type, alpha 1C subunit	GWAS	Ripke et al.,, (2013): Genome-wide association analysis identifies 13 new risk loci for schizophrenia. Nat Genet 45(10):1150-9.
CACNA1D	calcium voltage-gated channel subunit alpha1 D	WES	Purcell et al., (2014): A polygenic burden of rare disruptive mutations in schizophrenia. Nature 506:185-190.
CACNA1E	calcium voltage-gated channel subunit alpha1 E	WES	Purcell et al., (2014): A polygenic burden of rare disruptive mutations in schizophrenia. Nature 506:185-190.
CACNA1F	calcium voltage-gated channel subunit alpha1 F	WES	Purcell et al., (2014): A polygenic burden of rare disruptive mutations in schizophrenia. Nature 506:185-190.
CACNA1G	calcium voltage-gated channel subunit alpha1 G	WES	Purcell et al., (2014): A polygenic burden of rare disruptive mutations in schizophrenia. Nature 506:185-190.
CACNA1H	calcium voltage-gated channel subunit alpha1 H	WES	Purcell et al., (2014): A polygenic burden of rare disruptive mutations in schizophrenia. Nature 506:185-190.
CACNA1I	calcium channel, voltage-dependent, T type, alpha 1I subunit	GWAS	Schizophrenia Working Group of the Psychiatric Genomics Consortium, (2014): Biological insights from 108 schizophrenia-associated genetic loci. Nature 511(7510):421-7.
CACNA1S	calcium voltage-gated channel subunit alpha1 S	WES	Fromer et al.,, (2014): De novo mutations in schizophrenia implicate synaptic networks. Nature 506(7487):179-84.
CACNA2D1	calcium voltage-gated channel auxiliary subunit alpha2delta 1	WES	Purcell et al., (2014): A polygenic burden of rare disruptive mutations in schizophrenia. Nature 506:185-190.
CACNA2D2	calcium voltage-gated channel auxiliary subunit alpha2delta 2	WES	Purcell et al., (2014): A polygenic burden of rare disruptive mutations in schizophrenia. Nature 506:185-190.
CACNA2D3	calcium voltage-gated channel auxiliary subunit alpha2delta 3	WES	Purcell et al., (2014): A polygenic burden of rare disruptive mutations in schizophrenia. Nature 506:185-190.
CACNA2D4	calcium voltage-gated channel auxiliary subunit alpha2delta 4	WES	Purcell et al., (2014): A polygenic burden of rare disruptive mutations in schizophrenia. Nature 506:185-190.
CACNB1	calcium voltage-gated channel auxiliary subunit beta 1	WES	Purcell et al., (2014): A polygenic burden of rare disruptive mutations in schizophrenia. Nature 506:185-190.
CACNB2	calcium channel, voltage-dependent, beta 2 subunit	GWAS	Ripke et al.,, (2013): Genome-wide association analysis identifies 13 new risk loci for schizophrenia. Nat Genet 45(10):1150-9.
CACNB3	calcium voltage-gated channel auxiliary subunit beta 3	WES	Purcell et al., (2014): A polygenic burden of rare disruptive mutations in schizophrenia. Nature 506:185-190.
CACNB4	calcium voltage-gated channel auxiliary subunit beta 4	WES	Purcell et al., (2014): A polygenic burden of rare disruptive mutations in schizophrenia. Nature 506:185-190.
CACNG1	calcium voltage-gated channel auxiliary subunit gamma 1	WES	Purcell et al., (2014): A polygenic burden of rare disruptive mutations in schizophrenia. Nature 506:185-190.
CACNG2	calcium voltage-gated channel auxiliary subunit gamma 2	WES	Purcell et al., (2014): A polygenic burden of rare disruptive mutations in schizophrenia. Nature 506:185-190.
CACNG3	calcium voltage-gated channel auxiliary subunit gamma 3	WES	Purcell et al., (2014): A polygenic burden of rare disruptive mutations in schizophrenia. Nature 506:185-190.
CACNG4	calcium voltage-gated channel auxiliary subunit gamma 4	WES	Purcell et al., (2014): A polygenic burden of rare disruptive mutations in schizophrenia. Nature 506:185-190.
CACNG5	calcium voltage-gated channel auxiliary subunit gamma 5	WES	Purcell et al., (2014): A polygenic burden of rare disruptive mutations in schizophrenia. Nature 506:185-190.
CACNG6	calcium voltage-gated channel auxiliary subunit gamma 6	WES	Purcell et al., (2014): A polygenic burden of rare disruptive mutations in schizophrenia. Nature 506:185-190.
CACNG7	calcium voltage-gated channel auxiliary subunit gamma 7	WES	Purcell et al., (2014): A polygenic burden of rare disruptive mutations in schizophrenia. Nature 506:185-190.
CACNG8	calcium voltage-gated channel auxiliary subunit gamma 8	WES	Purcell et al., (2014): A polygenic burden of rare disruptive mutations in schizophrenia. Nature 506:185-190.
CACYBP	calcyclin binding protein	WES	Purcell et al., (2014): A polygenic burden of rare disruptive mutations in schizophrenia. Nature 506:185-190.
CADPS	Ca2+ dependent secretion activator	WES	Purcell et al., (2014): A polygenic burden of rare disruptive mutations in schizophrenia. Nature 506:185-190.
CALM1	calmodulin 1 (phosphorylase kinase, delta)	WES	Purcell et al., (2014): A polygenic burden of rare disruptive mutations in schizophrenia. Nature 506:185-190.
CALM3	calmodulin 3 (phosphorylase kinase, delta)	WES	Purcell et al., (2014): A polygenic burden of rare disruptive mutations in schizophrenia. Nature 506:185-190.
CAMK2A	calcium/calmodulin dependent protein kinase II alpha	WES	Purcell et al., (2014): A polygenic burden of rare disruptive mutations in schizophrenia. Nature 506:185-190.
CAMK2B	calcium/calmodulin dependent protein kinase II beta	WES	Purcell et al., (2014): A polygenic burden of rare disruptive mutations in schizophrenia. Nature 506:185-190.
CAMK2D	calcium/calmodulin dependent protein kinase II delta	WES	Purcell et al., (2014): A polygenic burden of rare disruptive mutations in schizophrenia. Nature 506:185-190.
CAMK2G	calcium/calmodulin dependent protein kinase II gamma	WES	Purcell et al., (2014): A polygenic burden of rare disruptive mutations in schizophrenia. Nature 506:185-190.
CAMK2N1	calcium/calmodulin dependent protein kinase II inhibitor 1	WES	Purcell et al., (2014): A polygenic burden of rare disruptive mutations in schizophrenia. Nature 506:185-190.
CAMK4	calcium/calmodulin-dependent protein kinase IV	WES	Purcell et al., (2014): A polygenic burden of rare disruptive mutations in schizophrenia. Nature 506:185-190.
CAMKK1	calcium/calmodulin-dependent protein kinase kinase 1	WES	Purcell et al., (2014): A polygenic burden of rare disruptive mutations in schizophrenia. Nature 506:185-190.
CAMKK2	calcium/calmodulin-dependent protein kinase kinase 2	WES	Purcell et al., (2014): A polygenic burden of rare disruptive mutations in schizophrenia. Nature 506:185-190.
CAMKV	CaM kinase like vesicle associated	WES	Purcell et al., (2014): A polygenic burden of rare disruptive mutations in schizophrenia. Nature 506:185-190.
CAMSAP1	calmodulin regulated spectrin associated protein 1	WES	Purcell et al., (2014): A polygenic burden of rare disruptive mutations in schizophrenia. Nature 506:185-190.
CAMTA1	calmodulin binding transcription activator 1	WES	Purcell et al., (2014): A polygenic burden of rare disruptive mutations in schizophrenia. Nature 506:185-190.
CAMTA2	calmodulin binding transcription activator 2	WES	Purcell et al., (2014): A polygenic burden of rare disruptive mutations in schizophrenia. Nature 506:185-190.
CAND1	cullin associated and neddylation dissociated 1	WES	Purcell et al., (2014): A polygenic burden of rare disruptive mutations in schizophrenia. Nature 506:185-190.
CANX	calnexin	WES	Purcell et al., (2014): A polygenic burden of rare disruptive mutations in schizophrenia. Nature 506:185-190.
CAP2	CAP, adenylate cyclase-associated protein, 2 (yeast)	WES	Purcell et al., (2014): A polygenic burden of rare disruptive mutations in schizophrenia. Nature 506:185-190.
CAPG	capping actin protein, gelsolin like	WES	Purcell et al., (2014): A polygenic burden of rare disruptive mutations in schizophrenia. Nature 506:185-190.
CAPN5	calpain 5	WES	Fromer et al.,, (2014): De novo mutations in schizophrenia implicate synaptic networks. Nature 506(7487):179-84.
CAPN9	calpain 9	WES	Fromer et al.,, (2014): De novo mutations in schizophrenia implicate synaptic networks. Nature 506(7487):179-84.
CAPZA1	capping actin protein of muscle Z-line alpha subunit 1	WES	Fromer et al.,, (2014): De novo mutations in schizophrenia implicate synaptic networks. Nature 506(7487):179-84.
CAPZA2	capping actin protein of muscle Z-line alpha subunit 2	WES	Purcell et al., (2014): A polygenic burden of rare disruptive mutations in schizophrenia. Nature 506:185-190.
CAPZB	capping actin protein of muscle Z-line beta subunit	WES	Purcell et al., (2014): A polygenic burden of rare disruptive mutations in schizophrenia. Nature 506:185-190.
CARD10	caspase recruitment domain family member 10	methylation	Montano et al.,, (2016): Association of DNA Methylation Differences With Schizophrenia in an Epigenome-Wide Association Study. JAMA Psychiatry 73(5):506-14.
CARD14	caspase recruitment domain family member 14	methylation	Montano et al.,, (2016): Association of DNA Methylation Differences With Schizophrenia in an Epigenome-Wide Association Study. JAMA Psychiatry 73(5):506-14.
CARD6	caspase recruitment domain family member 6	WES	Purcell et al., (2014): A polygenic burden of rare disruptive mutations in schizophrenia. Nature 506:185-190.
CASKIN1	CASK interacting protein 1	WES	Purcell et al., (2014): A polygenic burden of rare disruptive mutations in schizophrenia. Nature 506:185-190.
CASP4	caspase 4	WES	Purcell et al., (2014): A polygenic burden of rare disruptive mutations in schizophrenia. Nature 506:185-190.
CBFA2T2	CBFA2/RUNX1 translocation partner 2	WES	Fromer et al.,, (2014): De novo mutations in schizophrenia implicate synaptic networks. Nature 506(7487):179-84.
CBR1	carbonyl reductase 1	WES	Purcell et al., (2014): A polygenic burden of rare disruptive mutations in schizophrenia. Nature 506:185-190.
CBR3	carbonyl reductase 3	WES	Purcell et al., (2014): A polygenic burden of rare disruptive mutations in schizophrenia. Nature 506:185-190.
CBR4	carbonyl reductase 4	WES	Fromer et al.,, (2014): De novo mutations in schizophrenia implicate synaptic networks. Nature 506(7487):179-84.
CBX6	chromobox 6	WES	Purcell et al., (2014): A polygenic burden of rare disruptive mutations in schizophrenia. Nature 506:185-190.
CBX8	chromobox 8	WES	Fromer et al.,, (2014): De novo mutations in schizophrenia implicate synaptic networks. Nature 506(7487):179-84.
CC2D1A	coiled-coil and C2 domain containing 1A	WES	Purcell et al., (2014): A polygenic burden of rare disruptive mutations in schizophrenia. Nature 506:185-190.
CCBP2	atypical chemokine receptor 2	WES	Fromer et al.,, (2014): De novo mutations in schizophrenia implicate synaptic networks. Nature 506(7487):179-84.
CCDC108	cilia and flagella associated protein 65	WES	Purcell et al., (2014): A polygenic burden of rare disruptive mutations in schizophrenia. Nature 506:185-190.
CCDC136	coiled-coil domain containing 136	WES	Fromer et al.,, (2014): De novo mutations in schizophrenia implicate synaptic networks. Nature 506(7487):179-84.
CCDC137	coiled-coil domain containing 137	WES	Purcell et al., (2014): A polygenic burden of rare disruptive mutations in schizophrenia. Nature 506:185-190.
CCDC30	coiled-coil domain containing 30	WES	Fromer et al.,, (2014): De novo mutations in schizophrenia implicate synaptic networks. Nature 506(7487):179-84.
CCDC39	coiled-coil domain containing 39	GWAS	Schizophrenia Working Group of the Psychiatric Genomics Consortium, (2014): Biological insights from 108 schizophrenia-associated genetic loci. Nature 511(7510):421-7.
CCDC47	coiled-coil domain containing 47	WES	Fromer et al.,, (2014): De novo mutations in schizophrenia implicate synaptic networks. Nature 506(7487):179-84.
CCDC68	coiled-coil domain containing 68	GWAS	Schizophrenia Psychiatric Genome-Wide Association Study (GWAS) Consortium, (2011): Genome-wide association study identifies five new schizophrenia loci. Nat Genet 43(10):969-76.
CCDC84	coiled-coil domain containing 84	WES	Purcell et al., (2014): A polygenic burden of rare disruptive mutations in schizophrenia. Nature 506:185-190.
CCKAR	cholecystokinin A receptor	linkage/association studies	Allen et al., (2008): Systematic meta-analyses and field synopsis of genetic association studies in schizophrenia: the SzGene database. Nat Genet 40(7):827-34.
CCNE1	cyclin E1	methylation	Montano et al.,, (2016): Association of DNA Methylation Differences With Schizophrenia in an Epigenome-Wide Association Study. JAMA Psychiatry 73(5):506-14.
CCT2	chaperonin containing TCP1 subunit 2	WES	Purcell et al., (2014): A polygenic burden of rare disruptive mutations in schizophrenia. Nature 506:185-190.
CCT3	chaperonin containing TCP1 subunit 3	WES	Purcell et al., (2014): A polygenic burden of rare disruptive mutations in schizophrenia. Nature 506:185-190.
CCT4	chaperonin containing TCP1 subunit 4	WES	Purcell et al., (2014): A polygenic burden of rare disruptive mutations in schizophrenia. Nature 506:185-190.
CCT5	chaperonin containing TCP1 subunit 5	WES	Purcell et al., (2014): A polygenic burden of rare disruptive mutations in schizophrenia. Nature 506:185-190.
CCT6A	chaperonin containing TCP1 subunit 6A	WES	Purcell et al., (2014): A polygenic burden of rare disruptive mutations in schizophrenia. Nature 506:185-190.
CCT7	chaperonin containing TCP1 subunit 7	WES	Purcell et al., (2014): A polygenic burden of rare disruptive mutations in schizophrenia. Nature 506:185-190.
CCT8	chaperonin containing TCP1 subunit 8	WES	Purcell et al., (2014): A polygenic burden of rare disruptive mutations in schizophrenia. Nature 506:185-190.
CCT8L2	chaperonin containing TCP1 subunit 8 like 2	WES	Fromer et al.,, (2014): De novo mutations in schizophrenia implicate synaptic networks. Nature 506(7487):179-84.
CD14	CD14 molecule	GWAS	Schizophrenia Working Group of the Psychiatric Genomics Consortium, (2014): Biological insights from 108 schizophrenia-associated genetic loci. Nature 511(7510):421-7.
CD163	CD163 molecule	WES	Fromer et al.,, (2014): De novo mutations in schizophrenia implicate synaptic networks. Nature 506(7487):179-84.
CD163L1	CD163 molecule like 1	WES	Fromer et al.,, (2014): De novo mutations in schizophrenia implicate synaptic networks. Nature 506(7487):179-84.
CD177	CD177 molecule	methylation	Montano et al.,, (2016): Association of DNA Methylation Differences With Schizophrenia in an Epigenome-Wide Association Study. JAMA Psychiatry 73(5):506-14.
CD46	CD46 molecule, complement regulatory protein	GWAS	Schizophrenia Working Group of the Psychiatric Genomics Consortium, (2014): Biological insights from 108 schizophrenia-associated genetic loci. Nature 511(7510):421-7.
CD9	CD9 molecule	functional genomics	Ayalew M et al., (2012): Convergent functional genomics of schizophrenia: from comprehensive understanding to genetic risk prediction. Mol Psychiatry 17(9):887-905.
CD96	CD96 molecule	WES	Fromer et al.,, (2014): De novo mutations in schizophrenia implicate synaptic networks. Nature 506(7487):179-84.
CDA	cytidine deaminase	methylation	Montano et al.,, (2016): Association of DNA Methylation Differences With Schizophrenia in an Epigenome-Wide Association Study. JAMA Psychiatry 73(5):506-14.
CDC25C	cell division cycle 25C	GWAS	Schizophrenia Working Group of the Psychiatric Genomics Consortium, (2014): Biological insights from 108 schizophrenia-associated genetic loci. Nature 511(7510):421-7.
CDC37	cell division cycle 37	methylation	Montano et al.,, (2016): Association of DNA Methylation Differences With Schizophrenia in an Epigenome-Wide Association Study. JAMA Psychiatry 73(5):506-14.
CDC42	cell division cycle 42	functional study	Hill et al.,, (2006): Molecular mechanisms contributing to dendritic spine alterations in the prefrontal cortex of subjects with schizophrenia. Mol Psychiatry 11(6):557-66. Ide et al.,, (2010): Altered cortical CDC42 signaling pathways in schizophrenia: implications for dendritic spine deficits. Biol Psychiatry 68(1):25-2. Gilks et al.,, (2012): Functional investigation of a schizophrenia GWAS si…
CDC42BPA	CDC42 binding protein kinase alpha	WES	Purcell et al., (2014): A polygenic burden of rare disruptive mutations in schizophrenia. Nature 506:185-190.
CDC42BPB	CDC42 binding protein kinase beta	WES	Purcell et al., (2014): A polygenic burden of rare disruptive mutations in schizophrenia. Nature 506:185-190.
CDC42SE2	CDC42 small effector 2	linkage/association studies	Lewis et al.,, (2003): Genome scan meta-analysis of schizophrenia and bipolar disorder, part II: Schizophrenia. Am J Hum Genet 73(1):34-48.
CDCA7	cell division cycle associated 7	WES	Fromer et al.,, (2014): De novo mutations in schizophrenia implicate synaptic networks. Nature 506(7487):179-84.
CDCA7L	cell division cycle associated 7 like	WES	Fromer et al.,, (2014): De novo mutations in schizophrenia implicate synaptic networks. Nature 506(7487):179-84.
CDH13	cadherin 13	WES	Purcell et al., (2014): A polygenic burden of rare disruptive mutations in schizophrenia. Nature 506:185-190.
CDH2	cadherin 2	WES	Purcell et al., (2014): A polygenic burden of rare disruptive mutations in schizophrenia. Nature 506:185-190.
CDH5	cadherin 5	WES	Fromer et al.,, (2014): De novo mutations in schizophrenia implicate synaptic networks. Nature 506(7487):179-84.
CDIP1	cell death-inducing p53 target 1	WES	Fromer et al.,, (2014): De novo mutations in schizophrenia implicate synaptic networks. Nature 506(7487):179-84.
CDK16	cyclin-dependent kinase 16	WES	Purcell et al., (2014): A polygenic burden of rare disruptive mutations in schizophrenia. Nature 506:185-190.
CDK17	cyclin-dependent kinase 17	WES	Purcell et al., (2014): A polygenic burden of rare disruptive mutations in schizophrenia. Nature 506:185-190.
CDK2AP1	cyclin-dependent kinase 2 associated protein 1	GWAS	Schizophrenia Working Group of the Psychiatric Genomics Consortium, (2014): Biological insights from 108 schizophrenia-associated genetic loci. Nature 511(7510):421-7.
CDK5	cyclin-dependent kinase 5	WES	Purcell et al., (2014): A polygenic burden of rare disruptive mutations in schizophrenia. Nature 506:185-190.
CDK5R1	cyclin-dependent kinase 5 regulatory subunit 1	WES	Purcell et al., (2014): A polygenic burden of rare disruptive mutations in schizophrenia. Nature 506:185-190.
CDK5R2	cyclin-dependent kinase 5 regulatory subunit 2	WES	Purcell et al., (2014): A polygenic burden of rare disruptive mutations in schizophrenia. Nature 506:185-190.
CDKL5	cyclin dependent kinase like 5	WES	Purcell et al., (2014): A polygenic burden of rare disruptive mutations in schizophrenia. Nature 506:185-190.
CEACAM18	carcinoembryonic antigen related cell adhesion molecule 18	WES	Purcell et al., (2014): A polygenic burden of rare disruptive mutations in schizophrenia. Nature 506:185-190.
CELF2	CUGBP, Elav-like family member 2	WES	Purcell et al., (2014): A polygenic burden of rare disruptive mutations in schizophrenia. Nature 506:185-190.
CELF5	CUGBP, Elav-like family member 5	WES	Purcell et al., (2014): A polygenic burden of rare disruptive mutations in schizophrenia. Nature 506:185-190.
CELSR1	cadherin EGF LAG seven-pass G-type receptor 1	WES	Fromer et al.,, (2014): De novo mutations in schizophrenia implicate synaptic networks. Nature 506(7487):179-84.
CELSR2	cadherin EGF LAG seven-pass G-type receptor 2	WES	Purcell et al., (2014): A polygenic burden of rare disruptive mutations in schizophrenia. Nature 506:185-190.
CELSR3	cadherin EGF LAG seven-pass G-type receptor 3	WES	Fromer et al.,, (2014): De novo mutations in schizophrenia implicate synaptic networks. Nature 506(7487):179-84.
CEND1	cell cycle exit and neuronal differentiation 1	WES	Purcell et al., (2014): A polygenic burden of rare disruptive mutations in schizophrenia. Nature 506:185-190.
CENPM	centromere protein M	GWAS	Schizophrenia Working Group of the Psychiatric Genomics Consortium, (2014): Biological insights from 108 schizophrenia-associated genetic loci. Nature 511(7510):421-7.
CENPT	centromere protein T	GWAS	Schizophrenia Working Group of the Psychiatric Genomics Consortium, (2014): Biological insights from 108 schizophrenia-associated genetic loci. Nature 511(7510):421-7.
CEP164	centrosomal protein 164	WES	Fromer et al.,, (2014): De novo mutations in schizophrenia implicate synaptic networks. Nature 506(7487):179-84.
CEP170	centrosomal protein 170	WES	Purcell et al., (2014): A polygenic burden of rare disruptive mutations in schizophrenia. Nature 506:185-190.
CEP290	centrosomal protein 290	WES	Fromer et al.,, (2014): De novo mutations in schizophrenia implicate synaptic networks. Nature 506(7487):179-84.
CEP72	centrosomal protein 72	methylation	Montano et al.,, (2016): Association of DNA Methylation Differences With Schizophrenia in an Epigenome-Wide Association Study. JAMA Psychiatry 73(5):506-14.
CERK	ceramide kinase	WES	Fromer et al.,, (2014): De novo mutations in schizophrenia implicate synaptic networks. Nature 506(7487):179-84.
CES4A	carboxylesterase 4A	WES	Fromer et al.,, (2014): De novo mutations in schizophrenia implicate synaptic networks. Nature 506(7487):179-84.
CFB	complement factor B	linkage/association studies	Lewis et al.,, (2003): Genome scan meta-analysis of schizophrenia and bipolar disorder, part II: Schizophrenia. Am J Hum Genet 73(1):34-48.
CFL1	cofilin 1	WES	Purcell et al., (2014): A polygenic burden of rare disruptive mutations in schizophrenia. Nature 506:185-190.
CHADL	chondroadherin-like	GWAS	Schizophrenia Working Group of the Psychiatric Genomics Consortium, (2014): Biological insights from 108 schizophrenia-associated genetic loci. Nature 511(7510):421-7.
CHAT	choline O-acetyltransferase	linkage/association studies	Lewis et al.,, (2003): Genome scan meta-analysis of schizophrenia and bipolar disorder, part II: Schizophrenia. Am J Hum Genet 73(1):34-48.
CHCHD3	coiled-coil-helix-coiled-coil-helix domain containing 3	WES	Purcell et al., (2014): A polygenic burden of rare disruptive mutations in schizophrenia. Nature 506:185-190.
CHCHD6	coiled-coil-helix-coiled-coil-helix domain containing 6	WES	Purcell et al., (2014): A polygenic burden of rare disruptive mutations in schizophrenia. Nature 506:185-190.
CHD3	chromodomain helicase DNA binding protein 3	methylation	Aberg KA et al., (2014): Methylome-wide association study of schizophrenia: identifying blood biomarker signatures of environmental insults. JAMA Psychiatry 71(3):255-264.
CHD4	chromodomain helicase DNA binding protein 4	WES	Purcell et al., (2014): A polygenic burden of rare disruptive mutations in schizophrenia. Nature 506:185-190.
CHD5	chromodomain helicase DNA binding protein 5	WES	Purcell et al., (2014): A polygenic burden of rare disruptive mutations in schizophrenia. Nature 506:185-190.
CHD6	chromodomain helicase DNA binding protein 6	WES	Purcell et al., (2014): A polygenic burden of rare disruptive mutations in schizophrenia. Nature 506:185-190.
CHD8	chromodomain helicase DNA binding protein 8	WES	Purcell et al., (2014): A polygenic burden of rare disruptive mutations in schizophrenia. Nature 506:185-190.
CHFR	checkpoint with forkhead and ring finger domains	methylation	Aberg KA et al., (2014): Methylome-wide association study of schizophrenia: identifying blood biomarker signatures of environmental insults. JAMA Psychiatry 71(3):255-264.
CHGA	chromogranin A	linkage/association studies	Lewis et al.,, (2003): Genome scan meta-analysis of schizophrenia and bipolar disorder, part II: Schizophrenia. Am J Hum Genet 73(1):34-48.
CHGB	chromogranin B	linkage/association studies	Lewis et al.,, (2003): Genome scan meta-analysis of schizophrenia and bipolar disorder, part II: Schizophrenia. Am J Hum Genet 73(1):34-48.
CHI3L1	chitinase 3-like 1 (cartilage glycoprotein-39)	linkage/association studies	Lewis et al.,, (2003): Genome scan meta-analysis of schizophrenia and bipolar disorder, part II: Schizophrenia. Am J Hum Genet 73(1):34-48.
CHL1	cell adhesion molecule L1-like	linkage/association studies	Lewis et al.,, (2003): Genome scan meta-analysis of schizophrenia and bipolar disorder, part II: Schizophrenia. Am J Hum Genet 73(1):34-48.
CHMP2A	charged multivesicular body protein 2A	WES	Fromer et al.,, (2014): De novo mutations in schizophrenia implicate synaptic networks. Nature 506(7487):179-84.
CHMP4B	charged multivesicular body protein 4B	WES	Purcell et al., (2014): A polygenic burden of rare disruptive mutations in schizophrenia. Nature 506:185-190.
CHMP4C	charged multivesicular body protein 4C	WES	Fromer et al.,, (2014): De novo mutations in schizophrenia implicate synaptic networks. Nature 506(7487):179-84.
CHN1	chimerin 1	WES	Purcell et al., (2014): A polygenic burden of rare disruptive mutations in schizophrenia. Nature 506:185-190.
CHN2	chimerin 2	methylation	Montano et al.,, (2016): Association of DNA Methylation Differences With Schizophrenia in an Epigenome-Wide Association Study. JAMA Psychiatry 73(5):506-14.
CHRFAM7A	CHRNA7 (cholinergic receptor, nicotinic, alpha 7, exons 5-10) and FAM7A (family with sequence similarity 7A, exons A-E) fusion	linkage/association studies	Lewis et al.,, (2003): Genome scan meta-analysis of schizophrenia and bipolar disorder, part II: Schizophrenia. Am J Hum Genet 73(1):34-48.
CHRM4	cholinergic receptor, muscarinic 4	GWAS	Schizophrenia Working Group of the Psychiatric Genomics Consortium, (2014): Biological insights from 108 schizophrenia-associated genetic loci. Nature 511(7510):421-7.
CHRNA3	cholinergic receptor, nicotinic, alpha 3 (neuronal)	GWAS	Schizophrenia Working Group of the Psychiatric Genomics Consortium, (2014): Biological insights from 108 schizophrenia-associated genetic loci. Nature 511(7510):421-7.
CHRNA5	cholinergic receptor, nicotinic, alpha 5 (neuronal)	GWAS	Schizophrenia Working Group of the Psychiatric Genomics Consortium, (2014): Biological insights from 108 schizophrenia-associated genetic loci. Nature 511(7510):421-7.
CHRNA7	cholinergic receptor, nicotinic, alpha 7 (neuronal)	linkage/association studies	Lewis et al.,, (2003): Genome scan meta-analysis of schizophrenia and bipolar disorder, part II: Schizophrenia. Am J Hum Genet 73(1):34-48.
CHRNA7	cholinergic receptor nicotinic alpha 7 subunit	CNV-bearing	Luo et al.,, (2014): Systematic prioritization and integrative analysis of copy number variations in schizophrenia reveal key schizophrenia susceptibility genes. Schizophr Bull 40(6):1285-99.
CHRNB2	cholinergic receptor, nicotinic, beta 2 (neuronal)	linkage/association studies	Ng et al.,, (2009): Meta-analysis of 32 genome-wide linkage studies of schizophrenia. Mol Psychiatry 14(8):774-85.
CHRNB4	cholinergic receptor, nicotinic, beta 4 (neuronal)	GWAS	Schizophrenia Working Group of the Psychiatric Genomics Consortium, (2014): Biological insights from 108 schizophrenia-associated genetic loci. Nature 511(7510):421-7.
CHRNG	cholinergic receptor nicotinic gamma subunit	WES	Fromer et al.,, (2014): De novo mutations in schizophrenia implicate synaptic networks. Nature 506(7487):179-84.
CHST12	carbohydrate sulfotransferase 12	methylation	Montano et al.,, (2016): Association of DNA Methylation Differences With Schizophrenia in an Epigenome-Wide Association Study. JAMA Psychiatry 73(5):506-14.
CHST2	carbohydrate sulfotransferase 2	WES	Purcell et al., (2014): A polygenic burden of rare disruptive mutations in schizophrenia. Nature 506:185-190.
CHSY1	chondroitin sulfate synthase 1	WES	Fromer et al.,, (2014): De novo mutations in schizophrenia implicate synaptic networks. Nature 506(7487):179-84.
CHSY3	chondroitin sulfate synthase 3	WES	Fromer et al.,, (2014): De novo mutations in schizophrenia implicate synaptic networks. Nature 506(7487):179-84.
CIC	capicua transcriptional repressor	WES	Fromer et al.,, (2014): De novo mutations in schizophrenia implicate synaptic networks. Nature 506(7487):179-84.
CILP2	cartilage intermediate layer protein 2	GWAS	Schizophrenia Working Group of the Psychiatric Genomics Consortium, (2014): Biological insights from 108 schizophrenia-associated genetic loci. Nature 511(7510):421-7.
CISD1	CDGSH iron sulfur domain 1	WES	Purcell et al., (2014): A polygenic burden of rare disruptive mutations in schizophrenia. Nature 506:185-190.
CIT	citron rho-interacting serine/threonine kinase	WES	Purcell et al., (2014): A polygenic burden of rare disruptive mutations in schizophrenia. Nature 506:185-190.
CKAP4	cytoskeleton-associated protein 4	WES	Purcell et al., (2014): A polygenic burden of rare disruptive mutations in schizophrenia. Nature 506:185-190.
CKAP5	cytoskeleton associated protein 5	GWAS	Schizophrenia Working Group of the Psychiatric Genomics Consortium, (2014): Biological insights from 108 schizophrenia-associated genetic loci. Nature 511(7510):421-7.
CKB	creatine kinase, brain	GWAS	Schizophrenia Working Group of the Psychiatric Genomics Consortium, (2014): Biological insights from 108 schizophrenia-associated genetic loci. Nature 511(7510):421-7.
CKMT1B	creatine kinase, mitochondrial 1B	WES	Purcell et al., (2014): A polygenic burden of rare disruptive mutations in schizophrenia. Nature 506:185-190.
CLASP1	cytoplasmic linker associated protein 1	WES	Purcell et al., (2014): A polygenic burden of rare disruptive mutations in schizophrenia. Nature 506:185-190.
CLASP2	cytoplasmic linker associated protein 2	WES	Purcell et al., (2014): A polygenic burden of rare disruptive mutations in schizophrenia. Nature 506:185-190.
CLCN1	chloride voltage-gated channel 1	WES	Fromer et al.,, (2014): De novo mutations in schizophrenia implicate synaptic networks. Nature 506(7487):179-84.
CLCN3	chloride channel, voltage-sensitive 3	GWAS	Schizophrenia Working Group of the Psychiatric Genomics Consortium, (2014): Biological insights from 108 schizophrenia-associated genetic loci. Nature 511(7510):421-7.
CLDN5	claudin 5	linkage/association studies	Lewis et al.,, (2003): Genome scan meta-analysis of schizophrenia and bipolar disorder, part II: Schizophrenia. Am J Hum Genet 73(1):34-48.
CLEC16A	C-type lectin domain family 16 member A	WES	Fromer et al.,, (2014): De novo mutations in schizophrenia implicate synaptic networks. Nature 506(7487):179-84.
CLEC3A	C-type lectin domain family 3 member A	WES	Fromer et al.,, (2014): De novo mutations in schizophrenia implicate synaptic networks. Nature 506(7487):179-84.
CLIC5	chloride intracellular channel 5	WES	Purcell et al., (2014): A polygenic burden of rare disruptive mutations in schizophrenia. Nature 506:185-190.
CLINT1	clathrin interactor 1	linkage/association studies	Lewis et al.,, (2003): Genome scan meta-analysis of schizophrenia and bipolar disorder, part II: Schizophrenia. Am J Hum Genet 73(1):34-48.
CLIP3	CAP-Gly domain containing linker protein 3	WES	Purcell et al., (2014): A polygenic burden of rare disruptive mutations in schizophrenia. Nature 506:185-190.
CLNK	cytokine dependent hematopoietic cell linker	methylation	Montano et al.,, (2016): Association of DNA Methylation Differences With Schizophrenia in an Epigenome-Wide Association Study. JAMA Psychiatry 73(5):506-14.
CLNS1A	chloride nucleotide-sensitive channel 1A	WES	Fromer et al.,, (2014): De novo mutations in schizophrenia implicate synaptic networks. Nature 506(7487):179-84.
CLP1	cleavage and polyadenylation factor I subunit 1	GWAS	Schizophrenia Working Group of the Psychiatric Genomics Consortium, (2014): Biological insights from 108 schizophrenia-associated genetic loci. Nature 511(7510):421-7.
CLPX	caseinolytic mitochondrial matrix peptidase chaperone subunit	WES	Fromer et al.,, (2014): De novo mutations in schizophrenia implicate synaptic networks. Nature 506(7487):179-84.
CLSPN	claspin	WES	Fromer et al.,, (2014): De novo mutations in schizophrenia implicate synaptic networks. Nature 506(7487):179-84.
CLSTN1	calsyntenin 1	WES	Purcell et al., (2014): A polygenic burden of rare disruptive mutations in schizophrenia. Nature 506:185-190.
CLTC	clathrin heavy chain	WES	Purcell et al., (2014): A polygenic burden of rare disruptive mutations in schizophrenia. Nature 506:185-190.
CLU	clusterin	GWAS	Schizophrenia Working Group of the Psychiatric Genomics Consortium, (2014): Biological insights from 108 schizophrenia-associated genetic loci. Nature 511(7510):421-7.
CMPK2	cytidine/uridine monophosphate kinase 2	WES	Fromer et al.,, (2014): De novo mutations in schizophrenia implicate synaptic networks. Nature 506(7487):179-84.
CMYA5	cardiomyopathy associated 5	linkage/association studies	Allen et al., (2008): Systematic meta-analyses and field synopsis of genetic association studies in schizophrenia: the SzGene database. Nat Genet 40(7):827-34.
CNKSR2	connector enhancer of kinase suppressor of Ras 2	GWAS	Schizophrenia Working Group of the Psychiatric Genomics Consortium, (2014): Biological insights from 108 schizophrenia-associated genetic loci. Nature 511(7510):421-7.
CNNM2	cyclin and CBS domain divalent metal cation transport mediator 2	GWAS	Schizophrenia Psychiatric Genome-Wide Association Study (GWAS) Consortium, (2011): Genome-wide association study identifies five new schizophrenia loci. Nat Genet 43(10):969-76.
CNNM3	cyclin and CBS domain divalent metal cation transport mediator 3	WES	Fromer et al.,, (2014): De novo mutations in schizophrenia implicate synaptic networks. Nature 506(7487):179-84.
CNOT1	CCR4-NOT transcription complex, subunit 1	GWAS	Schizophrenia Working Group of the Psychiatric Genomics Consortium, (2014): Biological insights from 108 schizophrenia-associated genetic loci. Nature 511(7510):421-7.
CNP	2',3'-cyclic nucleotide 3' phosphodiesterase	WES	Purcell et al., (2014): A polygenic burden of rare disruptive mutations in schizophrenia. Nature 506:185-190.
CNR1	cannabinoid receptor 1 (brain)	functional genomics	Ayalew M et al., (2012): Convergent functional genomics of schizophrenia: from comprehensive understanding to genetic risk prediction. Mol Psychiatry 17(9):887-905.
CNTN1	contactin 1	WES	Purcell et al., (2014): A polygenic burden of rare disruptive mutations in schizophrenia. Nature 506:185-190.
CNTN2	contactin 2	WES	Purcell et al., (2014): A polygenic burden of rare disruptive mutations in schizophrenia. Nature 506:185-190.
CNTN3	contactin 3	WES	Fromer et al.,, (2014): De novo mutations in schizophrenia implicate synaptic networks. Nature 506(7487):179-84.
CNTN4	contactin 4	GWAS	Schizophrenia Working Group of the Psychiatric Genomics Consortium, (2014): Biological insights from 108 schizophrenia-associated genetic loci. Nature 511(7510):421-7.
CNTNAP1	contactin associated protein 1	WES	Purcell et al., (2014): A polygenic burden of rare disruptive mutations in schizophrenia. Nature 506:185-190.
COBL	cordon-bleu WH2 repeat protein	WES	Purcell et al., (2014): A polygenic burden of rare disruptive mutations in schizophrenia. Nature 506:185-190.
COG7	component of oligomeric golgi complex 7	WES	Fromer et al.,, (2014): De novo mutations in schizophrenia implicate synaptic networks. Nature 506(7487):179-84.
COL15A1	collagen type XV alpha 1 chain	WES	Fromer et al.,, (2014): De novo mutations in schizophrenia implicate synaptic networks. Nature 506(7487):179-84.
COL16A1	collagen type XVI alpha 1 chain	WES	Fromer et al.,, (2014): De novo mutations in schizophrenia implicate synaptic networks. Nature 506(7487):179-84.
COL27A1	collagen type XXVII alpha 1	WES	Fromer et al.,, (2014): De novo mutations in schizophrenia implicate synaptic networks. Nature 506(7487):179-84.
COL3A1	collagen type III alpha 1 chain	WES	Purcell et al., (2014): A polygenic burden of rare disruptive mutations in schizophrenia. Nature 506:185-190.
COL6A2	collagen type VI alpha 2	WES	Fromer et al.,, (2014): De novo mutations in schizophrenia implicate synaptic networks. Nature 506(7487):179-84.
COMT	catechol-O-methyltransferase	functional genomics	Ayalew M et al., (2012): Convergent functional genomics of schizophrenia: from comprehensive understanding to genetic risk prediction. Mol Psychiatry 17(9):887-905.
COMT	catechol-O-methyltransferase	CNV-bearing	Luo et al.,, (2014): Systematic prioritization and integrative analysis of copy number variations in schizophrenia reveal key schizophrenia susceptibility genes. Schizophr Bull 40(6):1285-99.
COPG1	coatomer protein complex subunit gamma 1	WES	Purcell et al., (2014): A polygenic burden of rare disruptive mutations in schizophrenia. Nature 506:185-190.
COQ10B	coenzyme Q10 homolog B (S. cerevisiae)	GWAS	Schizophrenia Working Group of the Psychiatric Genomics Consortium, (2014): Biological insights from 108 schizophrenia-associated genetic loci. Nature 511(7510):421-7.
CORO1A	coronin 1A	WES	Purcell et al., (2014): A polygenic burden of rare disruptive mutations in schizophrenia. Nature 506:185-190.
CORO1C	coronin 1C	WES	Purcell et al., (2014): A polygenic burden of rare disruptive mutations in schizophrenia. Nature 506:185-190.
CORO2B	coronin 2B	WES	Purcell et al., (2014): A polygenic burden of rare disruptive mutations in schizophrenia. Nature 506:185-190.
COX11P1	COX11 cytochrome c oxidase copper chaperone pseudogene 1	GWAS	Schizophrenia Working Group of the Psychiatric Genomics Consortium, (2014): Biological insights from 108 schizophrenia-associated genetic loci. Nature 511(7510):421-7.
COX4I1	cytochrome c oxidase subunit 4I1	WES	Fromer et al.,, (2014): De novo mutations in schizophrenia implicate synaptic networks. Nature 506(7487):179-84.
COX5B	cytochrome c oxidase subunit 5B	WES	Purcell et al., (2014): A polygenic burden of rare disruptive mutations in schizophrenia. Nature 506:185-190.
COX6B1	cytochrome c oxidase subunit 6B1	WES	Purcell et al., (2014): A polygenic burden of rare disruptive mutations in schizophrenia. Nature 506:185-190.
COX6C	cytochrome c oxidase subunit 6C	WES	Purcell et al., (2014): A polygenic burden of rare disruptive mutations in schizophrenia. Nature 506:185-190.
COX7A2L	cytochrome c oxidase subunit 7A2 like	WES	Purcell et al., (2014): A polygenic burden of rare disruptive mutations in schizophrenia. Nature 506:185-190.
CPE	carboxypeptidase E	WES	Purcell et al., (2014): A polygenic burden of rare disruptive mutations in schizophrenia. Nature 506:185-190.
CPLX1	complexin 1	WES	Purcell et al., (2014): A polygenic burden of rare disruptive mutations in schizophrenia. Nature 506:185-190.
CPLX2	complexin 2	functional genomics	Ayalew M et al., (2012): Convergent functional genomics of schizophrenia: from comprehensive understanding to genetic risk prediction. Mol Psychiatry 17(9):887-905.
CPNE5	copine 5	WES	Purcell et al., (2014): A polygenic burden of rare disruptive mutations in schizophrenia. Nature 506:185-190.
CPO	carboxypeptidase O	linkage/association studies	Ng et al.,, (2009): Meta-analysis of 32 genome-wide linkage studies of schizophrenia. Mol Psychiatry 14(8):774-85.
CPT1A	carnitine palmitoyltransferase 1A	methylation	Montano et al.,, (2016): Association of DNA Methylation Differences With Schizophrenia in an Epigenome-Wide Association Study. JAMA Psychiatry 73(5):506-14.
CPT1C	carnitine palmitoyltransferase 1C	WES	Purcell et al., (2014): A polygenic burden of rare disruptive mutations in schizophrenia. Nature 506:185-190.
CR1L	complement component (3b/4b) receptor 1-like	GWAS	Schizophrenia Working Group of the Psychiatric Genomics Consortium, (2014): Biological insights from 108 schizophrenia-associated genetic loci. Nature 511(7510):421-7.
CRBN	cereblon	methylation	Aberg KA et al., (2014): Methylome-wide association study of schizophrenia: identifying blood biomarker signatures of environmental insults. JAMA Psychiatry 71(3):255-264.
CREB1	cAMP responsive element binding protein 1	methylation	Aberg KA et al., (2014): Methylome-wide association study of schizophrenia: identifying blood biomarker signatures of environmental insults. JAMA Psychiatry 71(3):255-264.
CREB3L1	cAMP responsive element binding protein 3-like 1	GWAS	Schizophrenia Working Group of the Psychiatric Genomics Consortium, (2014): Biological insights from 108 schizophrenia-associated genetic loci. Nature 511(7510):421-7.
CREBBP	CREB binding protein	WES	Purcell et al., (2014): A polygenic burden of rare disruptive mutations in schizophrenia. Nature 506:185-190.
CRIP2	cysteine rich protein 2	WES	Purcell et al., (2014): A polygenic burden of rare disruptive mutations in schizophrenia. Nature 506:185-190.
CRKL	CRK like proto-oncogene, adaptor protein	CNV-bearing	Luo et al.,, (2014): Systematic prioritization and integrative analysis of copy number variations in schizophrenia reveal key schizophrenia susceptibility genes. Schizophr Bull 40(6):1285-99.
CRMP1	collapsin response mediator protein 1	WES	Purcell et al., (2014): A polygenic burden of rare disruptive mutations in schizophrenia. Nature 506:185-190.
CRP	C-reactive protein, pentraxin-related	linkage/association studies	Ng et al.,, (2009): Meta-analysis of 32 genome-wide linkage studies of schizophrenia. Mol Psychiatry 14(8):774-85.
CRTAC1	cartilage acidic protein 1	WES	Purcell et al., (2014): A polygenic burden of rare disruptive mutations in schizophrenia. Nature 506:185-190.
CRTC1	CREB regulated transcription coactivator 1	WES	Purcell et al., (2014): A polygenic burden of rare disruptive mutations in schizophrenia. Nature 506:185-190.
CRYAB	crystallin alpha B	WES	Purcell et al., (2014): A polygenic burden of rare disruptive mutations in schizophrenia. Nature 506:185-190.
CRYBG3	crystallin beta-gamma domain containing 3	WES	Fromer et al.,, (2014): De novo mutations in schizophrenia implicate synaptic networks. Nature 506(7487):179-84.
CRYM	crystallin mu	WES	Purcell et al., (2014): A polygenic burden of rare disruptive mutations in schizophrenia. Nature 506:185-190.
CS	citrate synthase	WES	Purcell et al., (2014): A polygenic burden of rare disruptive mutations in schizophrenia. Nature 506:185-190.
CSDE1	cold shock domain containing E1	methylation	Aberg KA et al., (2014): Methylome-wide association study of schizophrenia: identifying blood biomarker signatures of environmental insults. JAMA Psychiatry 71(3):255-264.
CSE1L	chromosome segregation 1 like	WES	Purcell et al., (2014): A polygenic burden of rare disruptive mutations in schizophrenia. Nature 506:185-190.
CSF2RA	colony stimulating factor 2 receptor, alpha, low-affinity (granulocyte-macrophage)	linkage/association studies	Lewis et al.,, (2003): Genome scan meta-analysis of schizophrenia and bipolar disorder, part II: Schizophrenia. Am J Hum Genet 73(1):34-48.
CSF2RB	colony stimulating factor 2 receptor, beta, low-affinity (granulocyte-macrophage)	linkage/association studies	Lewis et al.,, (2003): Genome scan meta-analysis of schizophrenia and bipolar disorder, part II: Schizophrenia. Am J Hum Genet 73(1):34-48.
CSMD1	CUB and Sushi multiple domains 1	GWAS	Schizophrenia Psychiatric Genome-Wide Association Study (GWAS) Consortium, (2011): Genome-wide association study identifies five new schizophrenia loci. Nat Genet 43(10):969-76.
CSMD2	CUB and Sushi multiple domains 2	WES	Fromer et al.,, (2014): De novo mutations in schizophrenia implicate synaptic networks. Nature 506(7487):179-84.
CSNK2B	casein kinase 2 beta	sherlock integrative analysis (http://sherlock.ucsf.edu/)
CSPG4	chondroitin sulfate proteoglycan 4	WES	Purcell et al., (2014): A polygenic burden of rare disruptive mutations in schizophrenia. Nature 506:185-190.
CSPG4P11	chondroitin sulfate proteoglycan 4 pseudogene 11	GWAS	Schizophrenia Working Group of the Psychiatric Genomics Consortium, (2014): Biological insights from 108 schizophrenia-associated genetic loci. Nature 511(7510):421-7.
CSPP1	centrosome and spindle pole associated protein 1	methylation	Montano et al.,, (2016): Association of DNA Methylation Differences With Schizophrenia in an Epigenome-Wide Association Study. JAMA Psychiatry 73(5):506-14.
CST3	cystatin C	WES	Purcell et al., (2014): A polygenic burden of rare disruptive mutations in schizophrenia. Nature 506:185-190.
CTBP1	C-terminal binding protein 1	WES	Purcell et al., (2014): A polygenic burden of rare disruptive mutations in schizophrenia. Nature 506:185-190.
CTCF	CCCTC-binding factor (zinc finger protein)	GWAS	Schizophrenia Working Group of the Psychiatric Genomics Consortium, (2014): Biological insights from 108 schizophrenia-associated genetic loci. Nature 511(7510):421-7.
CTNNA1	catenin (cadherin-associated protein), alpha 1, 102kDa	GWAS	Schizophrenia Working Group of the Psychiatric Genomics Consortium, (2014): Biological insights from 108 schizophrenia-associated genetic loci. Nature 511(7510):421-7.
CTNNA2	catenin alpha 2	WES	Fromer et al.,, (2014): De novo mutations in schizophrenia implicate synaptic networks. Nature 506(7487):179-84.
CTNNB1	catenin beta 1	functional study	Levchenko et al.,, (2015): Beta-catenin in schizophrenia: Possibly deleterious novel mutation. Psychiatry Res 228(3):843-8. Pandey et al.,, (2015): Region-specific dysregulation of glycogen synthase kinase-3β and β-catenin in the postmortem brains of subjects with bipolar disorder and schizophrenia. Bipolar Disord 17(2):160-71.
CTNND1	catenin (cadherin-associated protein), delta 1	GWAS	Schizophrenia Working Group of the Psychiatric Genomics Consortium, (2014): Biological insights from 108 schizophrenia-associated genetic loci. Nature 511(7510):421-7.
CTNND2	catenin delta 2	WES	Purcell et al., (2014): A polygenic burden of rare disruptive mutations in schizophrenia. Nature 506:185-190.
CTRC	chymotrypsin C	WES	Fromer et al.,, (2014): De novo mutations in schizophrenia implicate synaptic networks. Nature 506(7487):179-84.
CTRL	chymotrypsin-like	GWAS	Schizophrenia Working Group of the Psychiatric Genomics Consortium, (2014): Biological insights from 108 schizophrenia-associated genetic loci. Nature 511(7510):421-7.
CTSL1	cathepsin L	WES	Fromer et al.,, (2014): De novo mutations in schizophrenia implicate synaptic networks. Nature 506(7487):179-84.
CTTNBP2	cortactin binding protein 2	WES	Fromer et al.,, (2014): De novo mutations in schizophrenia implicate synaptic networks. Nature 506(7487):179-84.
CUL3	cullin 3	GWAS	Schizophrenia Working Group of the Psychiatric Genomics Consortium, (2014): Biological insights from 108 schizophrenia-associated genetic loci. Nature 511(7510):421-7.
CUL4A	cullin 4A	WES	Fromer et al.,, (2014): De novo mutations in schizophrenia implicate synaptic networks. Nature 506(7487):179-84.
CUL9	cullin 9	WES	Purcell et al., (2014): A polygenic burden of rare disruptive mutations in schizophrenia. Nature 506:185-190.
CUTA	cutA divalent cation tolerance homolog	methylation	Aberg KA et al., (2014): Methylome-wide association study of schizophrenia: identifying blood biomarker signatures of environmental insults. JAMA Psychiatry 71(3):255-264.
CUX1	cut like homeobox 1	WES	Purcell et al., (2014): A polygenic burden of rare disruptive mutations in schizophrenia. Nature 506:185-190.
CUX2	cut like homeobox 2	WES	Purcell et al., (2014): A polygenic burden of rare disruptive mutations in schizophrenia. Nature 506:185-190.
CUZD1	CUB and zona pellucida like domains 1	WES	Fromer et al.,, (2014): De novo mutations in schizophrenia implicate synaptic networks. Nature 506(7487):179-84.
CXCR2	chemokine (C-X-C motif) receptor 2	linkage/association studies	Ng et al.,, (2009): Meta-analysis of 32 genome-wide linkage studies of schizophrenia. Mol Psychiatry 14(8):774-85.
CXCR4	C-X-C motif chemokine receptor 4	methylation	Aberg KA et al., (2014): Methylome-wide association study of schizophrenia: identifying blood biomarker signatures of environmental insults. JAMA Psychiatry 71(3):255-264.
CYFIP1	cytoplasmic FMR1 interacting protein 1	WES	Purcell et al., (2014): A polygenic burden of rare disruptive mutations in schizophrenia. Nature 506:185-190.
CYFIP1	cytoplasmic FMR1 interacting protein 1	CNV-bearing	Luo et al.,, (2014): Systematic prioritization and integrative analysis of copy number variations in schizophrenia reveal key schizophrenia susceptibility genes. Schizophr Bull 40(6):1285-99.
CYFIP2	cytoplasmic FMR1 interacting protein 2	WES	Purcell et al., (2014): A polygenic burden of rare disruptive mutations in schizophrenia. Nature 506:185-190.
CYP17A1	cytochrome P450, family 17, subfamily A, polypeptide 1	GWAS	Schizophrenia Working Group of the Psychiatric Genomics Consortium, (2014): Biological insights from 108 schizophrenia-associated genetic loci. Nature 511(7510):421-7.
CYP1A2	cytochrome P450, family 1, subfamily A, polypeptide 2	linkage/association studies	Lewis et al.,, (2003): Genome scan meta-analysis of schizophrenia and bipolar disorder, part II: Schizophrenia. Am J Hum Genet 73(1):34-48.
CYP26B1	cytochrome P450, family 26, subfamily B, polypeptide 1	GWAS	Schizophrenia Working Group of the Psychiatric Genomics Consortium, (2014): Biological insights from 108 schizophrenia-associated genetic loci. Nature 511(7510):421-7.
CYP2D6	cytochrome P450, family 2, subfamily D, polypeptide 6	GWAS	Schizophrenia Working Group of the Psychiatric Genomics Consortium, (2014): Biological insights from 108 schizophrenia-associated genetic loci. Nature 511(7510):421-7.
CYP2D8P	cytochrome P450, family 2, subfamily D, polypeptide 8, pseudogene	GWAS	Schizophrenia Working Group of the Psychiatric Genomics Consortium, (2014): Biological insights from 108 schizophrenia-associated genetic loci. Nature 511(7510):421-7.
CYTH1	cytohesin 1	WES	Purcell et al., (2014): A polygenic burden of rare disruptive mutations in schizophrenia. Nature 506:185-190.
DAAM1	dishevelled associated activator of morphogenesis 1	methylation	Montano et al.,, (2016): Association of DNA Methylation Differences With Schizophrenia in an Epigenome-Wide Association Study. JAMA Psychiatry 73(5):506-14.
DAB2IP	DAB2 interacting protein	WES	Purcell et al., (2014): A polygenic burden of rare disruptive mutations in schizophrenia. Nature 506:185-190.
DAGLA	diacylglycerol lipase alpha	WES	Purcell et al., (2014): A polygenic burden of rare disruptive mutations in schizophrenia. Nature 506:185-190.
DAGLB	diacylglycerol lipase beta	WES	Fromer et al.,, (2014): De novo mutations in schizophrenia implicate synaptic networks. Nature 506(7487):179-84.
DAO	D-amino-acid oxidase	linkage/association studies	Allen et al., (2008): Systematic meta-analyses and field synopsis of genetic association studies in schizophrenia: the SzGene database. Nat Genet 40(7):827-34.
DAOA	D-amino acid oxidase activator	linkage/association studies	Allen et al., (2008): Systematic meta-analyses and field synopsis of genetic association studies in schizophrenia: the SzGene database. Nat Genet 40(7):827-34.
DAPK1	death associated protein kinase 1	WES	Purcell et al., (2014): A polygenic burden of rare disruptive mutations in schizophrenia. Nature 506:185-190.
DARC	atypical chemokine receptor 1 (Duffy blood group)	WES	Fromer et al.,, (2014): De novo mutations in schizophrenia implicate synaptic networks. Nature 506(7487):179-84.
DARS	aspartyl-tRNA synthetase	WES	Purcell et al., (2014): A polygenic burden of rare disruptive mutations in schizophrenia. Nature 506:185-190.
DAZAP1	DAZ associated protein 1	methylation	Montano et al.,, (2016): Association of DNA Methylation Differences With Schizophrenia in an Epigenome-Wide Association Study. JAMA Psychiatry 73(5):506-14.
DBC1	cell cycle and apoptosis regulator 2	WES	Purcell et al., (2014): A polygenic burden of rare disruptive mutations in schizophrenia. Nature 506:185-190.
DBI	diazepam binding inhibitor (GABA receptor modulator, acyl-CoA binding protein)	linkage/association studies	Ng et al.,, (2009): Meta-analysis of 32 genome-wide linkage studies of schizophrenia. Mol Psychiatry 14(8):774-85.
DBN1	drebrin 1	WES	Fromer et al.,, (2014): De novo mutations in schizophrenia implicate synaptic networks. Nature 506(7487):179-84.
DBNL	drebrin like	WES	Purcell et al., (2014): A polygenic burden of rare disruptive mutations in schizophrenia. Nature 506:185-190.
DBR1	debranching RNA lariats 1	methylation	Montano et al.,, (2016): Association of DNA Methylation Differences With Schizophrenia in an Epigenome-Wide Association Study. JAMA Psychiatry 73(5):506-14.
DCAF6	DDB1 and CUL4 associated factor 6	WES	Purcell et al., (2014): A polygenic burden of rare disruptive mutations in schizophrenia. Nature 506:185-190.
DCHS2	dachsous cadherin-related 2	WES	Fromer et al.,, (2014): De novo mutations in schizophrenia implicate synaptic networks. Nature 506(7487):179-84.
DCLK1	doublecortin like kinase 1	WES	Purcell et al., (2014): A polygenic burden of rare disruptive mutations in schizophrenia. Nature 506:185-190.
DCLK3	doublecortin like kinase 3	WES	Fromer et al.,, (2014): De novo mutations in schizophrenia implicate synaptic networks. Nature 506(7487):179-84.
DCST1	DC-STAMP domain containing 1	WES	Fromer et al.,, (2014): De novo mutations in schizophrenia implicate synaptic networks. Nature 506(7487):179-84.
DCTN1	dynactin subunit 1	WES	Purcell et al., (2014): A polygenic burden of rare disruptive mutations in schizophrenia. Nature 506:185-190.
DCTN2	dynactin subunit 2	WES	Purcell et al., (2014): A polygenic burden of rare disruptive mutations in schizophrenia. Nature 506:185-190.
DCTN3	dynactin subunit 3	WES	Fromer et al.,, (2014): De novo mutations in schizophrenia implicate synaptic networks. Nature 506(7487):179-84.
DDAH1	dimethylarginine dimethylaminohydrolase 1	WES	Purcell et al., (2014): A polygenic burden of rare disruptive mutations in schizophrenia. Nature 506:185-190.
DDB2	damage specific DNA binding protein 2	WES	Fromer et al.,, (2014): De novo mutations in schizophrenia implicate synaptic networks. Nature 506(7487):179-84.
DDHD2	DDHD domain containing 2	WES	Purcell et al., (2014): A polygenic burden of rare disruptive mutations in schizophrenia. Nature 506:185-190.
DDN	dendrin	WES	Purcell et al., (2014): A polygenic burden of rare disruptive mutations in schizophrenia. Nature 506:185-190.
DDR1	discoidin domain receptor tyrosine kinase 1	linkage/association studies	Lewis et al.,, (2003): Genome scan meta-analysis of schizophrenia and bipolar disorder, part II: Schizophrenia. Am J Hum Genet 73(1):34-48.
DDX1	DEAD/H-box helicase 1	WES	Purcell et al., (2014): A polygenic burden of rare disruptive mutations in schizophrenia. Nature 506:185-190.
DDX10	DEAD-box helicase 10	WES	Purcell et al., (2014): A polygenic burden of rare disruptive mutations in schizophrenia. Nature 506:185-190.
DDX10P2	DEAD (Asp-Glu-Ala-Asp) box polypeptide 10 pseudogene 2	GWAS	Schizophrenia Working Group of the Psychiatric Genomics Consortium, (2014): Biological insights from 108 schizophrenia-associated genetic loci. Nature 511(7510):421-7.
DDX24	DEAD-box helicase 24	WES	Purcell et al., (2014): A polygenic burden of rare disruptive mutations in schizophrenia. Nature 506:185-190.
DDX28	DEAD (Asp-Glu-Ala-Asp) box polypeptide 28	GWAS	Schizophrenia Working Group of the Psychiatric Genomics Consortium, (2014): Biological insights from 108 schizophrenia-associated genetic loci. Nature 511(7510):421-7.
DDX3X	DEAD-box helicase 3, X-linked	WES	Purcell et al., (2014): A polygenic burden of rare disruptive mutations in schizophrenia. Nature 506:185-190.
DENND5A	DENN domain containing 5A	WES	Purcell et al., (2014): A polygenic burden of rare disruptive mutations in schizophrenia. Nature 506:185-190.
DENND6B	DENN domain containing 6B	WES	Fromer et al.,, (2014): De novo mutations in schizophrenia implicate synaptic networks. Nature 506(7487):179-84.
DEPDC4	DEP domain containing 4	WES	Fromer et al.,, (2014): De novo mutations in schizophrenia implicate synaptic networks. Nature 506(7487):179-84.
DES	desmin	linkage/association studies	Ng et al.,, (2009): Meta-analysis of 32 genome-wide linkage studies of schizophrenia. Mol Psychiatry 14(8):774-85.
DFNA5	deafness, autosomal dominant 5	GWAS	Schizophrenia Working Group of the Psychiatric Genomics Consortium, (2014): Biological insights from 108 schizophrenia-associated genetic loci. Nature 511(7510):421-7.
DGCR2	DiGeorge syndrome critical region gene 2	linkage/association studies	Lewis et al.,, (2003): Genome scan meta-analysis of schizophrenia and bipolar disorder, part II: Schizophrenia. Am J Hum Genet 73(1):34-48.
DGCR6	DiGeorge syndrome critical region gene 6	linkage/association studies	Lewis et al.,, (2003): Genome scan meta-analysis of schizophrenia and bipolar disorder, part II: Schizophrenia. Am J Hum Genet 73(1):34-48.
DGCR6L	DiGeorge syndrome critical region gene 6-like	CNV-bearing	Luo et al.,, (2014): Systematic prioritization and integrative analysis of copy number variations in schizophrenia reveal key schizophrenia susceptibility genes. Schizophr Bull 40(6):1285-99.
DGKI	diacylglycerol kinase, iota	GWAS	Schizophrenia Working Group of the Psychiatric Genomics Consortium, (2014): Biological insights from 108 schizophrenia-associated genetic loci. Nature 511(7510):421-7.
DGKZ	diacylglycerol kinase, zeta	GWAS	Schizophrenia Working Group of the Psychiatric Genomics Consortium, (2014): Biological insights from 108 schizophrenia-associated genetic loci. Nature 511(7510):421-7.
DHCR24	24-dehydrocholesterol reductase	methylation	Montano et al.,, (2016): Association of DNA Methylation Differences With Schizophrenia in an Epigenome-Wide Association Study. JAMA Psychiatry 73(5):506-14.
DHX30	DEAH-box helicase 30	WES	Purcell et al., (2014): A polygenic burden of rare disruptive mutations in schizophrenia. Nature 506:185-190.
DHX8	DEAH-box helicase 8	WES	Purcell et al., (2014): A polygenic burden of rare disruptive mutations in schizophrenia. Nature 506:185-190.
DICER1	dicer 1, ribonuclease III	WES	Fromer et al.,, (2014): De novo mutations in schizophrenia implicate synaptic networks. Nature 506(7487):179-84.
DIDO1	death inducer-obliterator 1	WES	Purcell et al., (2014): A polygenic burden of rare disruptive mutations in schizophrenia. Nature 506:185-190.
DIP2A	disco interacting protein 2 homolog A	WES	Purcell et al., (2014): A polygenic burden of rare disruptive mutations in schizophrenia. Nature 506:185-190.
DIP2B	disco interacting protein 2 homolog B	WES	Purcell et al., (2014): A polygenic burden of rare disruptive mutations in schizophrenia. Nature 506:185-190.
DIP2C	disco interacting protein 2 homolog C	methylation	Montano et al.,, (2016): Association of DNA Methylation Differences With Schizophrenia in an Epigenome-Wide Association Study. JAMA Psychiatry 73(5):506-14.
DIRAS2	DIRAS family GTPase 2	WES	Purcell et al., (2014): A polygenic burden of rare disruptive mutations in schizophrenia. Nature 506:185-190.
DIS3L2	DIS3 like 3'-5' exoribonuclease 2	methylation	Montano et al.,, (2016): Association of DNA Methylation Differences With Schizophrenia in an Epigenome-Wide Association Study. JAMA Psychiatry 73(5):506-14.
DISC1	disrupted in schizophrenia 1	functional genomics	Ayalew M et al., (2012): Convergent functional genomics of schizophrenia: from comprehensive understanding to genetic risk prediction. Mol Psychiatry 17(9):887-905.
DISP2	dispatched RND transporter family member 2	WES	Purcell et al., (2014): A polygenic burden of rare disruptive mutations in schizophrenia. Nature 506:185-190.
DKK4	dickkopf WNT signaling pathway inhibitor 4	linkage/association studies	Lewis et al.,, (2003): Genome scan meta-analysis of schizophrenia and bipolar disorder, part II: Schizophrenia. Am J Hum Genet 73(1):34-48.
DLAT	dihydrolipoamide S-acetyltransferase	WES	Purcell et al., (2014): A polygenic burden of rare disruptive mutations in schizophrenia. Nature 506:185-190.
DLC1	DLC1 Rho GTPase activating protein	WES	Purcell et al., (2014): A polygenic burden of rare disruptive mutations in schizophrenia. Nature 506:185-190.
DLD	dihydrolipoamide dehydrogenase	WES	Purcell et al., (2014): A polygenic burden of rare disruptive mutations in schizophrenia. Nature 506:185-190.
DLG1	discs large MAGUK scaffold protein 1	WES	Fromer et al.,, (2014): De novo mutations in schizophrenia implicate synaptic networks. Nature 506(7487):179-84.
DLG2	discs large MAGUK scaffold protein 2	WES	Fromer et al.,, (2014): De novo mutations in schizophrenia implicate synaptic networks. Nature 506(7487):179-84.
DLG2	discs large MAGUK scaffold protein 2	CNV-bearing	Luo et al.,, (2014): Systematic prioritization and integrative analysis of copy number variations in schizophrenia reveal key schizophrenia susceptibility genes. Schizophr Bull 40(6):1285-99.
DLG3	discs large MAGUK scaffold protein 3	WES	Purcell et al., (2014): A polygenic burden of rare disruptive mutations in schizophrenia. Nature 506:185-190.
DLG4	discs large MAGUK scaffold protein 4	WES	Purcell et al., (2014): A polygenic burden of rare disruptive mutations in schizophrenia. Nature 506:185-190.
DLG5	discs large MAGUK scaffold protein 5	WES	Purcell et al., (2014): A polygenic burden of rare disruptive mutations in schizophrenia. Nature 506:185-190.
DLGAP1	DLG associated protein 1	WES	Purcell et al., (2014): A polygenic burden of rare disruptive mutations in schizophrenia. Nature 506:185-190.
DLGAP2	DLG associated protein 2	WES	Purcell et al., (2014): A polygenic burden of rare disruptive mutations in schizophrenia. Nature 506:185-190.
DLGAP3	DLG associated protein 3	WES	Purcell et al., (2014): A polygenic burden of rare disruptive mutations in schizophrenia. Nature 506:185-190.
DLGAP4	DLG associated protein 4	WES	Purcell et al., (2014): A polygenic burden of rare disruptive mutations in schizophrenia. Nature 506:185-190.
DLL4	delta like canonical Notch ligand 4	WES	Fromer et al.,, (2014): De novo mutations in schizophrenia implicate synaptic networks. Nature 506(7487):179-84.
DLST	dihydrolipoamide S-succinyltransferase	WES	Purcell et al., (2014): A polygenic burden of rare disruptive mutations in schizophrenia. Nature 506:185-190.
DLX1	distal-less homeobox 1	functional study	Kromkamp et al.,, (2003): Decreased thalamic expression of the homeobox gene DLX1 in psychosis. Arch Gen Psychiatry 60(9):869-74.
DLX5	distal-less homeobox 5	functional study	Poitras et al., (2010): An SNP in an ultraconserved regulatory element affects Dlx5/Dlx6 regulation in the forebrain. Development 137(18):3089-97. Cho et al., (2015): Gamma rhythms link prefrontal interneuron dysfunction with cognitive inflexibility in Dlx5/6(+/-) mice. Neuron 85(6):1332-43.
DLX6	distal-less homeobox 6	functional study	Poitras et al., (2010): An SNP in an ultraconserved regulatory element affects Dlx5/Dlx6 regulation in the forebrain. Development 137(18):3089-97. Cho et al., (2015): Gamma rhythms link prefrontal interneuron dysfunction with cognitive inflexibility in Dlx5/6(+/-) mice. Neuron 85(6):1332-43.
DMD	dystrophin	WES	Fromer et al.,, (2014): De novo mutations in schizophrenia implicate synaptic networks. Nature 506(7487):179-84.
DMWD	dystrophia myotonica, WD repeat containing	WES	Purcell et al., (2014): A polygenic burden of rare disruptive mutations in schizophrenia. Nature 506:185-190.
DMXL2	Dmx like 2	WES	Purcell et al., (2014): A polygenic burden of rare disruptive mutations in schizophrenia. Nature 506:185-190.
DNAH1	dynein axonemal heavy chain 1	WES	Fromer et al.,, (2014): De novo mutations in schizophrenia implicate synaptic networks. Nature 506(7487):179-84.
DNAH12	dynein axonemal heavy chain 12	WES	Fromer et al.,, (2014): De novo mutations in schizophrenia implicate synaptic networks. Nature 506(7487):179-84.
DNAH3	dynein axonemal heavy chain 3	WES	Fromer et al.,, (2014): De novo mutations in schizophrenia implicate synaptic networks. Nature 506(7487):179-84.
DNAH6	dynein axonemal heavy chain 6	WES	Fromer et al.,, (2014): De novo mutations in schizophrenia implicate synaptic networks. Nature 506(7487):179-84.
DNAH9	dynein axonemal heavy chain 9	WES	Fromer et al.,, (2014): De novo mutations in schizophrenia implicate synaptic networks. Nature 506(7487):179-84.
DNAJA1	DnaJ heat shock protein family (Hsp40) member A1	WES	Purcell et al., (2014): A polygenic burden of rare disruptive mutations in schizophrenia. Nature 506:185-190.
DNAJA4	DnaJ heat shock protein family (Hsp40) member A4	WES	Fromer et al.,, (2014): De novo mutations in schizophrenia implicate synaptic networks. Nature 506(7487):179-84.
DNAJB12	DnaJ heat shock protein family	methylation	Montano et al.,, (2016): Association of DNA Methylation Differences With Schizophrenia in an Epigenome-Wide Association Study. JAMA Psychiatry 73(5):506-14.
DNAJB4	DnaJ heat shock protein family (Hsp40) member B4	WES	Purcell et al., (2014): A polygenic burden of rare disruptive mutations in schizophrenia. Nature 506:185-190.
DNAJB6	DnaJ heat shock protein family (Hsp40) member B6	WES	Purcell et al., (2014): A polygenic burden of rare disruptive mutations in schizophrenia. Nature 506:185-190.
DNAJC13	DnaJ heat shock protein family (Hsp40) member C13	WES	Purcell et al., (2014): A polygenic burden of rare disruptive mutations in schizophrenia. Nature 506:185-190.
DNAJC19	DnaJ (Hsp40) homolog, subfamily C, member 19	GWAS	Schizophrenia Working Group of the Psychiatric Genomics Consortium, (2014): Biological insights from 108 schizophrenia-associated genetic loci. Nature 511(7510):421-7.
DNAJC6	DnaJ heat shock protein family (Hsp40) member C6	WES	Fromer et al.,, (2014): De novo mutations in schizophrenia implicate synaptic networks. Nature 506(7487):179-84.
DNASE1L2	deoxyribonuclease I-like 2	WES	Fromer et al.,, (2014): De novo mutations in schizophrenia implicate synaptic networks. Nature 506(7487):179-84.
DND1	DND microRNA-mediated repression inhibitor 1	GWAS	Schizophrenia Working Group of the Psychiatric Genomics Consortium, (2014): Biological insights from 108 schizophrenia-associated genetic loci. Nature 511(7510):421-7.
DNM2	dynamin 2	WES	Purcell et al., (2014): A polygenic burden of rare disruptive mutations in schizophrenia. Nature 506:185-190.
DNM3	dynamin 3	WES	Purcell et al., (2014): A polygenic burden of rare disruptive mutations in schizophrenia. Nature 506:185-190.
DOC2A	double C2-like domains, alpha	GWAS	Schizophrenia Working Group of the Psychiatric Genomics Consortium, (2014): Biological insights from 108 schizophrenia-associated genetic loci. Nature 511(7510):421-7.
DOCK10	dedicator of cytokinesis 10	WES	Purcell et al., (2014): A polygenic burden of rare disruptive mutations in schizophrenia. Nature 506:185-190.
DOCK3	dedicator of cytokinesis 3	WES	Purcell et al., (2014): A polygenic burden of rare disruptive mutations in schizophrenia. Nature 506:185-190.
DOCK4	dedicator of cytokinesis 4	WES	Purcell et al., (2014): A polygenic burden of rare disruptive mutations in schizophrenia. Nature 506:185-190.
DOCK9	dedicator of cytokinesis 9	WES	Purcell et al., (2014): A polygenic burden of rare disruptive mutations in schizophrenia. Nature 506:185-190.
DOPEY1	dopey family member 1	WES	Purcell et al., (2014): A polygenic burden of rare disruptive mutations in schizophrenia. Nature 506:185-190.
DOPEY2	dopey family member 2	WES	Purcell et al., (2014): A polygenic burden of rare disruptive mutations in schizophrenia. Nature 506:185-190.
DOT1L	DOT1 like histone lysine methyltransferase	WES	Purcell et al., (2014): A polygenic burden of rare disruptive mutations in schizophrenia. Nature 506:185-190.
DPEP2	dipeptidase 2	GWAS	Schizophrenia Working Group of the Psychiatric Genomics Consortium, (2014): Biological insights from 108 schizophrenia-associated genetic loci. Nature 511(7510):421-7.
DPEP3	dipeptidase 3	GWAS	Schizophrenia Working Group of the Psychiatric Genomics Consortium, (2014): Biological insights from 108 schizophrenia-associated genetic loci. Nature 511(7510):421-7.
DPM1	dolichyl-phosphate mannosyltransferase polypeptide 1, catalytic subunit	WES	Fromer et al.,, (2014): De novo mutations in schizophrenia implicate synaptic networks. Nature 506(7487):179-84.
DPP4	dipeptidyl-peptidase 4	GWAS	Schizophrenia Working Group of the Psychiatric Genomics Consortium, (2014): Biological insights from 108 schizophrenia-associated genetic loci. Nature 511(7510):421-7.
DPP8	dipeptidyl peptidase 8	WES	Purcell et al., (2014): A polygenic burden of rare disruptive mutations in schizophrenia. Nature 506:185-190.
DPYD	dihydropyrimidine dehydrogenase	GWAS	Schizophrenia Working Group of the Psychiatric Genomics Consortium, (2014): Biological insights from 108 schizophrenia-associated genetic loci. Nature 511(7510):421-7.
DPYD-AS1	DPYD antisense RNA 1	GWAS	Schizophrenia Working Group of the Psychiatric Genomics Consortium, (2014): Biological insights from 108 schizophrenia-associated genetic loci. Nature 511(7510):421-7.
DPYD-AS2	DPYD antisense RNA 2	GWAS	Schizophrenia Working Group of the Psychiatric Genomics Consortium, (2014): Biological insights from 108 schizophrenia-associated genetic loci. Nature 511(7510):421-7.
DPYD-IT1	DPYD intronic transcript 1	GWAS	Schizophrenia Working Group of the Psychiatric Genomics Consortium, (2014): Biological insights from 108 schizophrenia-associated genetic loci. Nature 511(7510):421-7.
DPYSL2	dihydropyrimidinase-like 2	linkage/association studies	Lewis et al.,, (2003): Genome scan meta-analysis of schizophrenia and bipolar disorder, part II: Schizophrenia. Am J Hum Genet 73(1):34-48.
DPYSL3	dihydropyrimidinase like 3	WES	Purcell et al., (2014): A polygenic burden of rare disruptive mutations in schizophrenia. Nature 506:185-190.
DRD1	dopamine receptor D1	linkage/association studies	Ng et al.,, (2009): Meta-analysis of 32 genome-wide linkage studies of schizophrenia. Mol Psychiatry 14(8):774-85.
DRD2	dopamine receptor D2	GWAS	Schizophrenia Working Group of the Psychiatric Genomics Consortium, (2014): Biological insights from 108 schizophrenia-associated genetic loci. Nature 511(7510):421-7.
DRD3	dopamine receptor D3	linkage/association studies	Lewis et al.,, (2003): Genome scan meta-analysis of schizophrenia and bipolar disorder, part II: Schizophrenia. Am J Hum Genet 73(1):34-48.
DRD4	dopamine receptor D4	linkage/association studies	Allen et al., (2008): Systematic meta-analyses and field synopsis of genetic association studies in schizophrenia: the SzGene database. Nat Genet 40(7):827-34.
DRD5	dopamine receptor D5	linkage/association studies	Lewis et al.,, (2003): Genome scan meta-analysis of schizophrenia and bipolar disorder, part II: Schizophrenia. Am J Hum Genet 73(1):34-48.
DRG2	developmentally regulated GTP binding protein 2	GWAS	Schizophrenia Working Group of the Psychiatric Genomics Consortium, (2014): Biological insights from 108 schizophrenia-associated genetic loci. Nature 511(7510):421-7.
DSCAM	DS cell adhesion molecule	WES	Fromer et al.,, (2014): De novo mutations in schizophrenia implicate synaptic networks. Nature 506(7487):179-84.
DSCAML1	DS cell adhesion molecule like 1	WES	Purcell et al., (2014): A polygenic burden of rare disruptive mutations in schizophrenia. Nature 506:185-190.
DST	dystonin	WES	Purcell et al., (2014): A polygenic burden of rare disruptive mutations in schizophrenia. Nature 506:185-190.
DSTN	destrin, actin depolymerizing factor	WES	Purcell et al., (2014): A polygenic burden of rare disruptive mutations in schizophrenia. Nature 506:185-190.
DTNA	dystrobrevin alpha	WES	Purcell et al., (2014): A polygenic burden of rare disruptive mutations in schizophrenia. Nature 506:185-190.
DTNBP1	dystrobrevin binding protein 1	functional genomics	Ayalew M et al., (2012): Convergent functional genomics of schizophrenia: from comprehensive understanding to genetic risk prediction. Mol Psychiatry 17(9):887-905.
DTX1	deltex 1	WES	Purcell et al., (2014): A polygenic burden of rare disruptive mutations in schizophrenia. Nature 506:185-190.
DUOXA1	dual oxidase maturation factor 1	WES	Fromer et al.,, (2014): De novo mutations in schizophrenia implicate synaptic networks. Nature 506(7487):179-84.
DUOXA2	dual oxidase maturation factor 2	WES	Fromer et al.,, (2014): De novo mutations in schizophrenia implicate synaptic networks. Nature 506(7487):179-84.
DUS2L	dihydrouridine synthase 2	GWAS	Schizophrenia Working Group of the Psychiatric Genomics Consortium, (2014): Biological insights from 108 schizophrenia-associated genetic loci. Nature 511(7510):421-7.
DUSP15	dual specificity phosphatase 15	WES	Fromer et al.,, (2014): De novo mutations in schizophrenia implicate synaptic networks. Nature 506(7487):179-84.
DUSP8	dual specificity phosphatase 8	WES	Purcell et al., (2014): A polygenic burden of rare disruptive mutations in schizophrenia. Nature 506:185-190.
DVL1	dishevelled segment polarity protein 1	WES	Fromer et al.,, (2014): De novo mutations in schizophrenia implicate synaptic networks. Nature 506(7487):179-84.
DYNC1H1	dynein cytoplasmic 1 heavy chain 1	WES	Purcell et al., (2014): A polygenic burden of rare disruptive mutations in schizophrenia. Nature 506:185-190.
DYNC1I1	dynein cytoplasmic 1 intermediate chain 1	WES	Purcell et al., (2014): A polygenic burden of rare disruptive mutations in schizophrenia. Nature 506:185-190.
DYNC1LI2	dynein cytoplasmic 1 light intermediate chain 2	WES	Purcell et al., (2014): A polygenic burden of rare disruptive mutations in schizophrenia. Nature 506:185-190.
DYNLL1	dynein light chain LC8-type 1	WES	Purcell et al., (2014): A polygenic burden of rare disruptive mutations in schizophrenia. Nature 506:185-190.
DYNLL2	dynein light chain LC8-type 2	WES	Purcell et al., (2014): A polygenic burden of rare disruptive mutations in schizophrenia. Nature 506:185-190.
DYNLRB1	dynein light chain roadblock-type 1	WES	Purcell et al., (2014): A polygenic burden of rare disruptive mutations in schizophrenia. Nature 506:185-190.
DYNLRB2	dynein light chain roadblock-type 2	WES	Purcell et al., (2014): A polygenic burden of rare disruptive mutations in schizophrenia. Nature 506:185-190.
DYRK2	dual specificity tyrosine phosphorylation regulated kinase 2	methylation	Montano et al.,, (2016): Association of DNA Methylation Differences With Schizophrenia in an Epigenome-Wide Association Study. JAMA Psychiatry 73(5):506-14.
DZIP3	DAZ interacting zinc finger protein 3	WES	Fromer et al.,, (2014): De novo mutations in schizophrenia implicate synaptic networks. Nature 506(7487):179-84.
EARS2	glutamyl-tRNA synthetase 2, mitochondrial	WES	Fromer et al.,, (2014): De novo mutations in schizophrenia implicate synaptic networks. Nature 506(7487):179-84.
EDC4	enhancer of mRNA decapping 4	GWAS	Schizophrenia Working Group of the Psychiatric Genomics Consortium, (2014): Biological insights from 108 schizophrenia-associated genetic loci. Nature 511(7510):421-7.
EDEM2	ER degradation enhancing alpha-mannosidase like protein 2	WES	Purcell et al., (2014): A polygenic burden of rare disruptive mutations in schizophrenia. Nature 506:185-190.
EEF1A1	eukaryotic translation elongation factor 1 alpha 1	WES	Purcell et al., (2014): A polygenic burden of rare disruptive mutations in schizophrenia. Nature 506:185-190.
EEF1A2	eukaryotic translation elongation factor 1 alpha 2	WES	Purcell et al., (2014): A polygenic burden of rare disruptive mutations in schizophrenia. Nature 506:185-190.
EEF1D	eukaryotic translation elongation factor 1 delta	methylation	Montano et al.,, (2016): Association of DNA Methylation Differences With Schizophrenia in an Epigenome-Wide Association Study. JAMA Psychiatry 73(5):506-14.
EEF1G	eukaryotic translation elongation factor 1 gamma	WES	Purcell et al., (2014): A polygenic burden of rare disruptive mutations in schizophrenia. Nature 506:185-190.
EEF2	eukaryotic translation elongation factor 2	WES	Purcell et al., (2014): A polygenic burden of rare disruptive mutations in schizophrenia. Nature 506:185-190.
EEF2K	eukaryotic elongation factor 2 kinase	WES	Fromer et al.,, (2014): De novo mutations in schizophrenia implicate synaptic networks. Nature 506(7487):179-84.
EFHD1	EF-hand domain family, member D1	GWAS	Schizophrenia Working Group of the Psychiatric Genomics Consortium, (2014): Biological insights from 108 schizophrenia-associated genetic loci. Nature 511(7510):421-7.
EFHD2	EF-hand domain family member D2	WES	Purcell et al., (2014): A polygenic burden of rare disruptive mutations in schizophrenia. Nature 506:185-190.
EFTUD1P1	elongation factor Tu GTP binding domain containing 1 pseudogene 1	GWAS	Schizophrenia Working Group of the Psychiatric Genomics Consortium, (2014): Biological insights from 108 schizophrenia-associated genetic loci. Nature 511(7510):421-7.
EFTUD2	elongation factor Tu GTP binding domain containing 2	WES	Fromer et al.,, (2014): De novo mutations in schizophrenia implicate synaptic networks. Nature 506(7487):179-84.
EGF	epidermal growth factor	linkage/association studies	Lewis et al.,, (2003): Genome scan meta-analysis of schizophrenia and bipolar disorder, part II: Schizophrenia. Am J Hum Genet 73(1):34-48.
EGFL7	EGF like domain multiple 7	WES	Fromer et al.,, (2014): De novo mutations in schizophrenia implicate synaptic networks. Nature 506(7487):179-84.
EGR1	early growth response 1	GWAS	Schizophrenia Working Group of the Psychiatric Genomics Consortium, (2014): Biological insights from 108 schizophrenia-associated genetic loci. Nature 511(7510):421-7.
EGR3	early growth response 3	linkage/association studies	Lewis et al.,, (2003): Genome scan meta-analysis of schizophrenia and bipolar disorder, part II: Schizophrenia. Am J Hum Genet 73(1):34-48.
EHD1	EH domain containing 1	WES	Purcell et al., (2014): A polygenic burden of rare disruptive mutations in schizophrenia. Nature 506:185-190.
EHD3	EH domain containing 3	WES	Purcell et al., (2014): A polygenic burden of rare disruptive mutations in schizophrenia. Nature 506:185-190.
EHMT1	euchromatic histone lysine methyltransferase 1	WES	Purcell et al., (2014): A polygenic burden of rare disruptive mutations in schizophrenia. Nature 506:185-190.
EHMT2	euchromatic histone lysine methyltransferase 2	WES	Purcell et al., (2014): A polygenic burden of rare disruptive mutations in schizophrenia. Nature 506:185-190.
EIF2B2	eukaryotic translation initiation factor 2B subunit beta	methylation	Montano et al.,, (2016): Association of DNA Methylation Differences With Schizophrenia in an Epigenome-Wide Association Study. JAMA Psychiatry 73(5):506-14.
EIF2C1	argonaute 1, RISC catalytic component	WES	Purcell et al., (2014): A polygenic burden of rare disruptive mutations in schizophrenia. Nature 506:185-190.
EIF2C2	argonaute 2, RISC catalytic component	WES	Purcell et al., (2014): A polygenic burden of rare disruptive mutations in schizophrenia. Nature 506:185-190.
EIF3FP3	eukaryotic translation initiation factor 3, subunit F pseudogene 3	GWAS	Schizophrenia Working Group of the Psychiatric Genomics Consortium, (2014): Biological insights from 108 schizophrenia-associated genetic loci. Nature 511(7510):421-7.
EIF4A2	eukaryotic translation initiation factor 4A2	sherlock integrative analysis (http://sherlock.ucsf.edu/)
EIF4ENIF1	eukaryotic translation initiation factor 4E nuclear import factor 1	WES	Fromer et al.,, (2014): De novo mutations in schizophrenia implicate synaptic networks. Nature 506(7487):179-84.
EIF4G1	eukaryotic translation initiation factor 4 gamma 1	WES	Fromer et al.,, (2014): De novo mutations in schizophrenia implicate synaptic networks. Nature 506(7487):179-84.
EIF4G2	eukaryotic translation initiation factor 4 gamma 2	WES	Purcell et al., (2014): A polygenic burden of rare disruptive mutations in schizophrenia. Nature 506:185-190.
EIF4G3	eukaryotic translation initiation factor 4 gamma 3	WES	Purcell et al., (2014): A polygenic burden of rare disruptive mutations in schizophrenia. Nature 506:185-190.
EIF5	eukaryotic translation initiation factor 5	WES	Purcell et al., (2014): A polygenic burden of rare disruptive mutations in schizophrenia. Nature 506:185-190.
ELFN2	extracellular leucine rich repeat and fibronectin type III domain containing 2	WES	Purcell et al., (2014): A polygenic burden of rare disruptive mutations in schizophrenia. Nature 506:185-190.
ELMO2	engulfment and cell motility 2	WES	Purcell et al., (2014): A polygenic burden of rare disruptive mutations in schizophrenia. Nature 506:185-190.
EMC1	ER membrane protein complex subunit 1	WES	Fromer et al.,, (2014): De novo mutations in schizophrenia implicate synaptic networks. Nature 506(7487):179-84.
EML2	echinoderm microtubule associated protein like 2	WES	Purcell et al., (2014): A polygenic burden of rare disruptive mutations in schizophrenia. Nature 506:185-190.
EML6	echinoderm microtubule associated protein like 6	WES	Fromer et al.,, (2014): De novo mutations in schizophrenia implicate synaptic networks. Nature 506(7487):179-84.
EMP2	epithelial membrane protein 2	methylation	Montano et al.,, (2016): Association of DNA Methylation Differences With Schizophrenia in an Epigenome-Wide Association Study. JAMA Psychiatry 73(5):506-14.
EMR1	adhesion G protein-coupled receptor E1	WES	Fromer et al.,, (2014): De novo mutations in schizophrenia implicate synaptic networks. Nature 506(7487):179-84.
EMR3	adhesion G protein-coupled receptor E3	WES	Purcell et al., (2014): A polygenic burden of rare disruptive mutations in schizophrenia. Nature 506:185-190.
ENC1	ectodermal-neural cortex 1	WES	Purcell et al., (2014): A polygenic burden of rare disruptive mutations in schizophrenia. Nature 506:185-190.
ENKD1	enkurin domain containing 1	GWAS	Schizophrenia Working Group of the Psychiatric Genomics Consortium, (2014): Biological insights from 108 schizophrenia-associated genetic loci. Nature 511(7510):421-7.
ENO1	enolase 1	WES	Purcell et al., (2014): A polygenic burden of rare disruptive mutations in schizophrenia. Nature 506:185-190.
ENO2	enolase 2	WES	Purcell et al., (2014): A polygenic burden of rare disruptive mutations in schizophrenia. Nature 506:185-190.
ENO3	enolase 3	WES	Purcell et al., (2014): A polygenic burden of rare disruptive mutations in schizophrenia. Nature 506:185-190.
ENPP6	ectonucleotide pyrophosphatase/phosphodiesterase 6	WES	Purcell et al., (2014): A polygenic burden of rare disruptive mutations in schizophrenia. Nature 506:185-190.
ENSA	endosulfine alpha	linkage/association studies	Ng et al.,, (2009): Meta-analysis of 32 genome-wide linkage studies of schizophrenia. Mol Psychiatry 14(8):774-85.
ENTPD8	ectonucleoside triphosphate diphosphohydrolase 8	methylation	Aberg KA et al., (2014): Methylome-wide association study of schizophrenia: identifying blood biomarker signatures of environmental insults. JAMA Psychiatry 71(3):255-264.
EP300	E1A binding protein p300	GWAS	Schizophrenia Working Group of the Psychiatric Genomics Consortium, (2014): Biological insights from 108 schizophrenia-associated genetic loci. Nature 511(7510):421-7.
EP400	E1A binding protein p400	WES	Purcell et al., (2014): A polygenic burden of rare disruptive mutations in schizophrenia. Nature 506:185-190.
EPB41	erythrocyte membrane protein band 4.1	WES	Fromer et al.,, (2014): De novo mutations in schizophrenia implicate synaptic networks. Nature 506(7487):179-84.
EPB41L1	erythrocyte membrane protein band 4.1 like 1	WES	Fromer et al.,, (2014): De novo mutations in schizophrenia implicate synaptic networks. Nature 506(7487):179-84.
EPB41L2	erythrocyte membrane protein band 4.1 like 2	sherlock integrative analysis (http://sherlock.ucsf.edu/)
EPB41L3	erythrocyte membrane protein band 4.1 like 3	WES	Purcell et al., (2014): A polygenic burden of rare disruptive mutations in schizophrenia. Nature 506:185-190.
EPC1	enhancer of polycomb homolog 1	WES	Fromer et al.,, (2014): De novo mutations in schizophrenia implicate synaptic networks. Nature 506(7487):179-84.
EPC2	enhancer of polycomb homolog 2 (Drosophila)	GWAS	Schizophrenia Working Group of the Psychiatric Genomics Consortium, (2014): Biological insights from 108 schizophrenia-associated genetic loci. Nature 511(7510):421-7.
EPHA2	EPH receptor A2	WES	Fromer et al.,, (2014): De novo mutations in schizophrenia implicate synaptic networks. Nature 506(7487):179-84.
EPHA4	EPH receptor A4	WES	Purcell et al., (2014): A polygenic burden of rare disruptive mutations in schizophrenia. Nature 506:185-190.
EPHB3	EPH receptor B3	WES	Fromer et al.,, (2014): De novo mutations in schizophrenia implicate synaptic networks. Nature 506(7487):179-84.
EPHX2	epoxide hydrolase 2, cytoplasmic	GWAS	Schizophrenia Working Group of the Psychiatric Genomics Consortium, (2014): Biological insights from 108 schizophrenia-associated genetic loci. Nature 511(7510):421-7.
EPN1	epsin 1	WES	Purcell et al., (2014): A polygenic burden of rare disruptive mutations in schizophrenia. Nature 506:185-190.
EPPK1	epiplakin 1	WES	Fromer et al.,, (2014): De novo mutations in schizophrenia implicate synaptic networks. Nature 506(7487):179-84.
EPRS	glutamyl-prolyl-tRNA synthetase	WES	Purcell et al., (2014): A polygenic burden of rare disruptive mutations in schizophrenia. Nature 506:185-190.
EPS15L1	epidermal growth factor receptor pathway substrate 15 like 1	WES	Purcell et al., (2014): A polygenic burden of rare disruptive mutations in schizophrenia. Nature 506:185-190.
EPYC	epiphycan	WES	Fromer et al.,, (2014): De novo mutations in schizophrenia implicate synaptic networks. Nature 506(7487):179-84.
ERBB2	erb-b2 receptor tyrosine kinase 2	WES	Fromer et al.,, (2014): De novo mutations in schizophrenia implicate synaptic networks. Nature 506(7487):179-84.
ERBB3	erb-b2 receptor tyrosine kinase 3	linkage/association studies	Lewis et al.,, (2003): Genome scan meta-analysis of schizophrenia and bipolar disorder, part II: Schizophrenia. Am J Hum Genet 73(1):34-48.
ERBB4	erb-b2 receptor tyrosine kinase 4	linkage/association studies	Lewis et al.,, (2003): Genome scan meta-analysis of schizophrenia and bipolar disorder, part II: Schizophrenia. Am J Hum Genet 73(1):34-48.
ERC1	ELKS/RAB6-interacting/CAST family member 1	WES	Purcell et al., (2014): A polygenic burden of rare disruptive mutations in schizophrenia. Nature 506:185-190.
ERC2	ELKS/RAB6-interacting/CAST family member 2	WES	Purcell et al., (2014): A polygenic burden of rare disruptive mutations in schizophrenia. Nature 506:185-190.
ERCC4	excision repair cross-complementation group 4	GWAS	Schizophrenia Working Group of the Psychiatric Genomics Consortium, (2014): Biological insights from 108 schizophrenia-associated genetic loci. Nature 511(7510):421-7.
ERF	ETS2 repressor factor	WES	Fromer et al.,, (2014): De novo mutations in schizophrenia implicate synaptic networks. Nature 506(7487):179-84.
ESAM	endothelial cell adhesion molecule	GWAS	Schizophrenia Working Group of the Psychiatric Genomics Consortium, (2014): Biological insights from 108 schizophrenia-associated genetic loci. Nature 511(7510):421-7.
ESCO2	establishment of sister chromatid cohesion N-acetyltransferase 2	WES	Fromer et al.,, (2014): De novo mutations in schizophrenia implicate synaptic networks. Nature 506(7487):179-84.
ESPN	espin	WES	Fromer et al.,, (2014): De novo mutations in schizophrenia implicate synaptic networks. Nature 506(7487):179-84.
ESR2	estrogen receptor 2	WES	Fromer et al.,, (2014): De novo mutations in schizophrenia implicate synaptic networks. Nature 506(7487):179-84.
ESRP2	epithelial splicing regulatory protein 2	GWAS	Schizophrenia Working Group of the Psychiatric Genomics Consortium, (2014): Biological insights from 108 schizophrenia-associated genetic loci. Nature 511(7510):421-7.
ETF1	eukaryotic translation termination factor 1	GWAS	Schizophrenia Working Group of the Psychiatric Genomics Consortium, (2014): Biological insights from 108 schizophrenia-associated genetic loci. Nature 511(7510):421-7.
ETS2	ETS proto-oncogene 2, transcription factor	methylation	Montano et al.,, (2016): Association of DNA Methylation Differences With Schizophrenia in an Epigenome-Wide Association Study. JAMA Psychiatry 73(5):506-14.
EVC2	EvC ciliary complex subunit 2	WES	Purcell et al., (2014): A polygenic burden of rare disruptive mutations in schizophrenia. Nature 506:185-190.
EVI5L	ecotropic viral integration site 5 like	WES	Fromer et al.,, (2014): De novo mutations in schizophrenia implicate synaptic networks. Nature 506(7487):179-84.
EVL	Enah/Vasp-like	WES	Purcell et al., (2014): A polygenic burden of rare disruptive mutations in schizophrenia. Nature 506:185-190.
EXD3	exonuclease 3'-5' domain containing 3	WES	Fromer et al.,, (2014): De novo mutations in schizophrenia implicate synaptic networks. Nature 506(7487):179-84.
EXOC1	exocyst complex component 1	WES	Purcell et al., (2014): A polygenic burden of rare disruptive mutations in schizophrenia. Nature 506:185-190.
EXOC2	exocyst complex component 2	WES	Fromer et al.,, (2014): De novo mutations in schizophrenia implicate synaptic networks. Nature 506(7487):179-84.
EXOC3	exocyst complex component 3	WES	Purcell et al., (2014): A polygenic burden of rare disruptive mutations in schizophrenia. Nature 506:185-190.
EXOC4	exocyst complex component 4	WES	Purcell et al., (2014): A polygenic burden of rare disruptive mutations in schizophrenia. Nature 506:185-190.
EXOC8	exocyst complex component 8	WES	Purcell et al., (2014): A polygenic burden of rare disruptive mutations in schizophrenia. Nature 506:185-190.
EXTL1	exostosin like glycosyltransferase 1	WES	Fromer et al.,, (2014): De novo mutations in schizophrenia implicate synaptic networks. Nature 506(7487):179-84.
EXTL3	exostosin like glycosyltransferase 3	WES	Purcell et al., (2014): A polygenic burden of rare disruptive mutations in schizophrenia. Nature 506:185-190.
EZR	ezrin	WES	Purcell et al., (2014): A polygenic burden of rare disruptive mutations in schizophrenia. Nature 506:185-190.
F12	coagulation factor XII (Hageman factor)	linkage/association studies	Ng et al.,, (2009): Meta-analysis of 32 genome-wide linkage studies of schizophrenia. Mol Psychiatry 14(8):774-85.
F2	coagulation factor II (thrombin)	GWAS	Schizophrenia Working Group of the Psychiatric Genomics Consortium, (2014): Biological insights from 108 schizophrenia-associated genetic loci. Nature 511(7510):421-7.
FABP4	fatty acid binding protein 4	WES	Fromer et al.,, (2014): De novo mutations in schizophrenia implicate synaptic networks. Nature 506(7487):179-84.
FABP7	fatty acid binding protein 7, brain	functional genomics	Ayalew M et al., (2012): Convergent functional genomics of schizophrenia: from comprehensive understanding to genetic risk prediction. Mol Psychiatry 17(9):887-905.
FABP7P1	fatty acid binding protein 7, brain pseudogene 1	GWAS	Schizophrenia Working Group of the Psychiatric Genomics Consortium, (2014): Biological insights from 108 schizophrenia-associated genetic loci. Nature 511(7510):421-7.
FADS2	fatty acid desaturase 2	WES	Fromer et al.,, (2014): De novo mutations in schizophrenia implicate synaptic networks. Nature 506(7487):179-84.
FAM102B	family with sequence similarity 102 member B	methylation	Montano et al.,, (2016): Association of DNA Methylation Differences With Schizophrenia in an Epigenome-Wide Association Study. JAMA Psychiatry 73(5):506-14.
FAM109B	family with sequence similarity 109, member B	GWAS	Schizophrenia Working Group of the Psychiatric Genomics Consortium, (2014): Biological insights from 108 schizophrenia-associated genetic loci. Nature 511(7510):421-7.
FAM115A	TRPM8 channel associated factor 1	WES	Purcell et al., (2014): A polygenic burden of rare disruptive mutations in schizophrenia. Nature 506:185-190.
FAM120A	family with sequence similarity 120A	WES	Purcell et al., (2014): A polygenic burden of rare disruptive mutations in schizophrenia. Nature 506:185-190.
FAM134A	family with sequence similarity 134, member A	linkage/association studies	Ng et al.,, (2009): Meta-analysis of 32 genome-wide linkage studies of schizophrenia. Mol Psychiatry 14(8):774-85.
FAM13C	family with sequence similarity 13 member C	WES	Purcell et al., (2014): A polygenic burden of rare disruptive mutations in schizophrenia. Nature 506:185-190.
FAM160A2	family with sequence similarity 160 member A2	WES	Purcell et al., (2014): A polygenic burden of rare disruptive mutations in schizophrenia. Nature 506:185-190.
FAM160B1	family with sequence similarity 160 member B1	WES	Fromer et al.,, (2014): De novo mutations in schizophrenia implicate synaptic networks. Nature 506(7487):179-84.
FAM160B2	family with sequence similarity 160 member B2	WES	Fromer et al.,, (2014): De novo mutations in schizophrenia implicate synaptic networks. Nature 506(7487):179-84.
FAM171B	family with sequence similarity 171 member B	WES	Purcell et al., (2014): A polygenic burden of rare disruptive mutations in schizophrenia. Nature 506:185-190.
FAM179B	family with sequence similarity 179 member B	WES	Purcell et al., (2014): A polygenic burden of rare disruptive mutations in schizophrenia. Nature 506:185-190.
FAM186B	family with sequence similarity 186 member B	WES	Fromer et al.,, (2014): De novo mutations in schizophrenia implicate synaptic networks. Nature 506(7487):179-84.
FAM189B	family with sequence similarity 189, member B	linkage/association studies	Ng et al.,, (2009): Meta-analysis of 32 genome-wide linkage studies of schizophrenia. Mol Psychiatry 14(8):774-85.
FAM20A	family with sequence similarity 20 member A	WES	Fromer et al.,, (2014): De novo mutations in schizophrenia implicate synaptic networks. Nature 506(7487):179-84.
FAM3D	family with sequence similarity 3 member D	WES	Purcell et al., (2014): A polygenic burden of rare disruptive mutations in schizophrenia. Nature 506:185-190.
FAM46C	family with sequence similarity 46 member C	methylation	Montano et al.,, (2016): Association of DNA Methylation Differences With Schizophrenia in an Epigenome-Wide Association Study. JAMA Psychiatry 73(5):506-14.
FAM49A	family with sequence similarity 49 member A	WES	Purcell et al., (2014): A polygenic burden of rare disruptive mutations in schizophrenia. Nature 506:185-190.
FAM53C	family with sequence similarity 53, member C	GWAS	Schizophrenia Working Group of the Psychiatric Genomics Consortium, (2014): Biological insights from 108 schizophrenia-associated genetic loci. Nature 511(7510):421-7.
FAM57B	family with sequence similarity 57, member B	GWAS	Schizophrenia Working Group of the Psychiatric Genomics Consortium, (2014): Biological insights from 108 schizophrenia-associated genetic loci. Nature 511(7510):421-7.
FAM5B	bone morphogenetic protein/retinoic acid inducible neural-specific 2	GWAS	Schizophrenia Working Group of the Psychiatric Genomics Consortium, (2014): Biological insights from 108 schizophrenia-associated genetic loci. Nature 511(7510):421-7.
FAM60A	family with sequence similarity 60 member A	methylation	Aberg KA et al., (2014): Methylome-wide association study of schizophrenia: identifying blood biomarker signatures of environmental insults. JAMA Psychiatry 71(3):255-264.
FAM63B	family with sequence similarity 63 member B	methylation	Montano et al.,, (2016): Association of DNA Methylation Differences With Schizophrenia in an Epigenome-Wide Association Study. JAMA Psychiatry 73(5):506-14.
FAM65A	family with sequence similarity 65 member A	WES	Purcell et al., (2014): A polygenic burden of rare disruptive mutations in schizophrenia. Nature 506:185-190.
FAM81A	family with sequence similarity 81 member A	WES	Purcell et al., (2014): A polygenic burden of rare disruptive mutations in schizophrenia. Nature 506:185-190.
FAM83A	family with sequence similarity 83 member A	methylation	Montano et al.,, (2016): Association of DNA Methylation Differences With Schizophrenia in an Epigenome-Wide Association Study. JAMA Psychiatry 73(5):506-14.
FAM83C	family with sequence similarity 83 member C	WES	Fromer et al.,, (2014): De novo mutations in schizophrenia implicate synaptic networks. Nature 506(7487):179-84.
FAM83H	family with sequence similarity 83 member H	WES	Fromer et al.,, (2014): De novo mutations in schizophrenia implicate synaptic networks. Nature 506(7487):179-84.
FANCL	Fanconi anemia, complementation group L	GWAS	Schizophrenia Working Group of the Psychiatric Genomics Consortium, (2014): Biological insights from 108 schizophrenia-associated genetic loci. Nature 511(7510):421-7.
FARP1	FERM, ARH/RhoGEF and pleckstrin domain protein 1	WES	Purcell et al., (2014): A polygenic burden of rare disruptive mutations in schizophrenia. Nature 506:185-190.
FARSA	phenylalanyl-tRNA synthetase alpha subunit	WES	Fromer et al.,, (2014): De novo mutations in schizophrenia implicate synaptic networks. Nature 506(7487):179-84.
FARSB	phenylalanyl-tRNA synthetase beta subunit	WES	Purcell et al., (2014): A polygenic burden of rare disruptive mutations in schizophrenia. Nature 506:185-190.
FAS	Fas cell surface death receptor	linkage/association studies	Lewis et al.,, (2003): Genome scan meta-analysis of schizophrenia and bipolar disorder, part II: Schizophrenia. Am J Hum Genet 73(1):34-48.
FASN	fatty acid synthase	WES	Purcell et al., (2014): A polygenic burden of rare disruptive mutations in schizophrenia. Nature 506:185-190.
FASTKD5	FAST kinase domains 5	WES	Purcell et al., (2014): A polygenic burden of rare disruptive mutations in schizophrenia. Nature 506:185-190.
FAT1	FAT atypical cadherin 1	WES	Purcell et al., (2014): A polygenic burden of rare disruptive mutations in schizophrenia. Nature 506:185-190.
FAT2	FAT atypical cadherin 2	WES	Purcell et al., (2014): A polygenic burden of rare disruptive mutations in schizophrenia. Nature 506:185-190.
FAT3	FAT atypical cadherin 3	WES	Purcell et al., (2014): A polygenic burden of rare disruptive mutations in schizophrenia. Nature 506:185-190.
FAT4	FAT atypical cadherin 4	WES	Fromer et al.,, (2014): De novo mutations in schizophrenia implicate synaptic networks. Nature 506(7487):179-84.
FAUP2	FBR-MuSV-associated ubiquitously expressed (fox derived) pseudogene 2	GWAS	Schizophrenia Working Group of the Psychiatric Genomics Consortium, (2014): Biological insights from 108 schizophrenia-associated genetic loci. Nature 511(7510):421-7.
FBXL16	F-box and leucine rich repeat protein 16	WES	Purcell et al., (2014): A polygenic burden of rare disruptive mutations in schizophrenia. Nature 506:185-190.
FBXL18	F-box and leucine rich repeat protein 18	WES	Fromer et al.,, (2014): De novo mutations in schizophrenia implicate synaptic networks. Nature 506(7487):179-84.
FBXL19	F-box and leucine rich repeat protein 19	WES	Fromer et al.,, (2014): De novo mutations in schizophrenia implicate synaptic networks. Nature 506(7487):179-84.
FBXO31	F-box protein 31	WES	Fromer et al.,, (2014): De novo mutations in schizophrenia implicate synaptic networks. Nature 506(7487):179-84.
FBXO39	F-box protein 39	WES	Fromer et al.,, (2014): De novo mutations in schizophrenia implicate synaptic networks. Nature 506(7487):179-84.
FBXO41	F-box protein 41	WES	Purcell et al., (2014): A polygenic burden of rare disruptive mutations in schizophrenia. Nature 506:185-190.
FBXO46	F-box protein 46	methylation	Aberg KA et al., (2014): Methylome-wide association study of schizophrenia: identifying blood biomarker signatures of environmental insults. JAMA Psychiatry 71(3):255-264.
FBXO7	F-box protein 7	WES	Purcell et al., (2014): A polygenic burden of rare disruptive mutations in schizophrenia. Nature 506:185-190.
FCAR	Fc fragment of IgA receptor	methylation	Aberg KA et al., (2014): Methylome-wide association study of schizophrenia: identifying blood biomarker signatures of environmental insults. JAMA Psychiatry 71(3):255-264.
FCGBP	Fc fragment of IgG binding protein	WES	Purcell et al., (2014): A polygenic burden of rare disruptive mutations in schizophrenia. Nature 506:185-190.
FCGR2B	Fc fragment of IgG receptor IIb	methylation	Aberg KA et al., (2014): Methylome-wide association study of schizophrenia: identifying blood biomarker signatures of environmental insults. JAMA Psychiatry 71(3):255-264.
FCGR2C	Fc fragment of IgG receptor IIc	methylation	Montano et al.,, (2016): Association of DNA Methylation Differences With Schizophrenia in an Epigenome-Wide Association Study. JAMA Psychiatry 73(5):506-14.
FCGR3B	Fc fragment of IgG receptor IIIb	WES	Fromer et al.,, (2014): De novo mutations in schizophrenia implicate synaptic networks. Nature 506(7487):179-84.
FCHO1	FCH domain only 1	WES	Purcell et al., (2014): A polygenic burden of rare disruptive mutations in schizophrenia. Nature 506:185-190.
FCRL1	Fc receptor like 1	methylation	Montano et al.,, (2016): Association of DNA Methylation Differences With Schizophrenia in an Epigenome-Wide Association Study. JAMA Psychiatry 73(5):506-14.
FDX1L	ferredoxin 1 like	methylation	Montano et al.,, (2016): Association of DNA Methylation Differences With Schizophrenia in an Epigenome-Wide Association Study. JAMA Psychiatry 73(5):506-14.
FES	FES proto-oncogene, tyrosine kinase	GWAS	Schizophrenia Working Group of the Psychiatric Genomics Consortium, (2014): Biological insights from 108 schizophrenia-associated genetic loci. Nature 511(7510):421-7.
FGF1	fibroblast growth factor 1 (acidic)	linkage/association studies	Lewis et al.,, (2003): Genome scan meta-analysis of schizophrenia and bipolar disorder, part II: Schizophrenia. Am J Hum Genet 73(1):34-48.
FGFR1	fibroblast growth factor receptor 1	functional study	Gaughran et al.,, (2006): Hippocampal FGF-2 and FGFR1 mRNA expression in major depression, schizophrenia and bipolar disorder. Brain Res Bull 70(3):221-7. Narla et al.,, (2017): Common developmental genome deprogramming in schizophrenia - Role of Integrative Nuclear FGFR1 Signaling (INFS). Schizophr Res pii: S0920-9964(16)30568-0.
FGFR2	fibroblast growth factor receptor 2	functional study	O'DOnovan et al.,, (2009): Analysis of 10 independent samples provides evidence for association between schizophrenia and a SNP flanking fibroblast growth factor receptor 2. Mol Psychiatry 14(1):30-6.
FKBP8	FK506 binding protein 8	WES	Purcell et al., (2014): A polygenic burden of rare disruptive mutations in schizophrenia. Nature 506:185-190.
FKBPL	FK506 binding protein like	WES	Fromer et al.,, (2014): De novo mutations in schizophrenia implicate synaptic networks. Nature 506(7487):179-84.
FLNA	filamin A	WES	Purcell et al., (2014): A polygenic burden of rare disruptive mutations in schizophrenia. Nature 506:185-190.
FLOT1	flotillin 1	WES	Purcell et al., (2014): A polygenic burden of rare disruptive mutations in schizophrenia. Nature 506:185-190.
FLOT2	flotillin 2	WES	Purcell et al., (2014): A polygenic burden of rare disruptive mutations in schizophrenia. Nature 506:185-190.
FLYWCH1P1	FLYWCH-type zinc finger 1 pseudogene 1	GWAS	Schizophrenia Working Group of the Psychiatric Genomics Consortium, (2014): Biological insights from 108 schizophrenia-associated genetic loci. Nature 511(7510):421-7.
FMN2	formin 2	WES	Purcell et al., (2014): A polygenic burden of rare disruptive mutations in schizophrenia. Nature 506:185-190.
FMNL2	formin like 2	WES	Purcell et al., (2014): A polygenic burden of rare disruptive mutations in schizophrenia. Nature 506:185-190.
FMNL3	formin like 3	WES	Purcell et al., (2014): A polygenic burden of rare disruptive mutations in schizophrenia. Nature 506:185-190.
FMO5	flavin containing monooxygenase	CNV-bearing	Luo et al.,, (2014): Systematic prioritization and integrative analysis of copy number variations in schizophrenia reveal key schizophrenia susceptibility genes. Schizophr Bull 40(6):1285-99.
FN1	fibronectin 1	linkage/association studies	Ng et al.,, (2009): Meta-analysis of 32 genome-wide linkage studies of schizophrenia. Mol Psychiatry 14(8):774-85.
FN3KRP	fructosamine 3 kinase related protein	WES	Fromer et al.,, (2014): De novo mutations in schizophrenia implicate synaptic networks. Nature 506(7487):179-84.
FNDC3B	fibronectin type III domain containing 3B	methylation	Aberg KA et al., (2014): Methylome-wide association study of schizophrenia: identifying blood biomarker signatures of environmental insults. JAMA Psychiatry 71(3):255-264.
FONG	formiminotransferase cyclodeaminase N-terminal like	GWAS	Schizophrenia Working Group of the Psychiatric Genomics Consortium, (2014): Biological insights from 108 schizophrenia-associated genetic loci. Nature 511(7510):421-7.
FOXD3	forkhead box D3	functional study	Drerup et al.,, (2009): Disc1 regulates foxd3 and sox10 expression, affecting neural crest migration and differentiation. Development 136(15):2623-32.
FOXK2	forkhead box K2	WES	Purcell et al., (2014): A polygenic burden of rare disruptive mutations in schizophrenia. Nature 506:185-190.
FOXN3	forkhead box N3	methylation	Montano et al.,, (2016): Association of DNA Methylation Differences With Schizophrenia in an Epigenome-Wide Association Study. JAMA Psychiatry 73(5):506-14.
FOXO1	forkhead box O1	methylation	Aberg KA et al., (2014): Methylome-wide association study of schizophrenia: identifying blood biomarker signatures of environmental insults. JAMA Psychiatry 71(3):255-264.
FOXO3	forkhead box O3	WES	Purcell et al., (2014): A polygenic burden of rare disruptive mutations in schizophrenia. Nature 506:185-190.
FOXP1	forkhead box P1	methylation	Aberg KA et al., (2014): Methylome-wide association study of schizophrenia: identifying blood biomarker signatures of environmental insults. JAMA Psychiatry 71(3):255-264.
FOXP2	forkhead box P2	linkage/association studies	Lewis et al.,, (2003): Genome scan meta-analysis of schizophrenia and bipolar disorder, part II: Schizophrenia. Am J Hum Genet 73(1):34-48.
FOXRED1	FAD-dependent oxidoreductase domain containing 1	WES	Fromer et al.,, (2014): De novo mutations in schizophrenia implicate synaptic networks. Nature 506(7487):179-84.
FPR2	formyl peptide receptor 2	WES	Fromer et al.,, (2014): De novo mutations in schizophrenia implicate synaptic networks. Nature 506(7487):179-84.
FRMPD4	FERM and PDZ domain containing 4	WES	Purcell et al., (2014): A polygenic burden of rare disruptive mutations in schizophrenia. Nature 506:185-190.
FRY	FRY microtubule binding protein	WES	Purcell et al., (2014): A polygenic burden of rare disruptive mutations in schizophrenia. Nature 506:185-190.
FRZB	frizzled-related protein	methylation	Montano et al.,, (2016): Association of DNA Methylation Differences With Schizophrenia in an Epigenome-Wide Association Study. JAMA Psychiatry 73(5):506-14.
FSCN1	fascin actin-bundling protein 1	methylation	Montano et al.,, (2016): Association of DNA Methylation Differences With Schizophrenia in an Epigenome-Wide Association Study. JAMA Psychiatry 73(5):506-14.
FSD1	fibronectin type III and SPRY domain containing 1	WES	Purcell et al., (2014): A polygenic burden of rare disruptive mutations in schizophrenia. Nature 506:185-190.
FSD1L	fibronectin type III and SPRY domain containing 1 like	WES	Fromer et al.,, (2014): De novo mutations in schizophrenia implicate synaptic networks. Nature 506(7487):179-84.
FTH1	ferritin heavy chain 1	WES	Purcell et al., (2014): A polygenic burden of rare disruptive mutations in schizophrenia. Nature 506:185-190.
FUBP1	far upstream element binding protein 1	WES	Fromer et al.,, (2014): De novo mutations in schizophrenia implicate synaptic networks. Nature 506(7487):179-84.
FURIN	furin (paired basic amino acid cleaving enzyme)	GWAS	Schizophrenia Working Group of the Psychiatric Genomics Consortium, (2014): Biological insights from 108 schizophrenia-associated genetic loci. Nature 511(7510):421-7.
FUT9	fucosyltransferase 9 (alpha (1,3) fucosyltransferase)	GWAS	Schizophrenia Working Group of the Psychiatric Genomics Consortium, (2014): Biological insights from 108 schizophrenia-associated genetic loci. Nature 511(7510):421-7.
FXR1	fragile X mental retardation, autosomal homolog 1	GWAS	Schizophrenia Working Group of the Psychiatric Genomics Consortium, (2014): Biological insights from 108 schizophrenia-associated genetic loci. Nature 511(7510):421-7.
FXYD2	FXYD domain containing ion transport regulator 2	linkage/association studies	Lewis et al.,, (2003): Genome scan meta-analysis of schizophrenia and bipolar disorder, part II: Schizophrenia. Am J Hum Genet 73(1):34-48.
FXYD6	FXYD domain containing ion transport regulator 6	linkage/association studies	Lewis et al.,, (2003): Genome scan meta-analysis of schizophrenia and bipolar disorder, part II: Schizophrenia. Am J Hum Genet 73(1):34-48.
FYN	FYN proto-oncogene, Src family tyrosine kinase	WES	Purcell et al., (2014): A polygenic burden of rare disruptive mutations in schizophrenia. Nature 506:185-190.
FZD3	frizzled class receptor 3	linkage/association studies	Lewis et al.,, (2003): Genome scan meta-analysis of schizophrenia and bipolar disorder, part II: Schizophrenia. Am J Hum Genet 73(1):34-48.
GABBR1	gamma-aminobutyric acid (GABA) B receptor, 1	linkage/association studies	Lewis et al.,, (2003): Genome scan meta-analysis of schizophrenia and bipolar disorder, part II: Schizophrenia. Am J Hum Genet 73(1):34-48.
GABBR2	gamma-aminobutyric acid type B receptor subunit 2	WES	Purcell et al., (2014): A polygenic burden of rare disruptive mutations in schizophrenia. Nature 506:185-190.
GABRA1	gamma-aminobutyric acid (GABA) A receptor, alpha 1	linkage/association studies	Lewis et al.,, (2003): Genome scan meta-analysis of schizophrenia and bipolar disorder, part II: Schizophrenia. Am J Hum Genet 73(1):34-48.
GABRA6	gamma-aminobutyric acid (GABA) A receptor, alpha 6	linkage/association studies	Lewis et al.,, (2003): Genome scan meta-analysis of schizophrenia and bipolar disorder, part II: Schizophrenia. Am J Hum Genet 73(1):34-48.
GABRB2	gamma-aminobutyric acid (GABA) A receptor, beta 2	linkage/association studies	Allen et al., (2008): Systematic meta-analyses and field synopsis of genetic association studies in schizophrenia: the SzGene database. Nat Genet 40(7):827-34.
GABRB3	gamma-aminobutyric acid (GABA) A receptor, beta 3	functional genomics	Ayalew M et al., (2012): Convergent functional genomics of schizophrenia: from comprehensive understanding to genetic risk prediction. Mol Psychiatry 17(9):887-905.
GABRG2	gamma-aminobutyric acid (GABA) A receptor, gamma 2	linkage/association studies	Lewis et al.,, (2003): Genome scan meta-analysis of schizophrenia and bipolar disorder, part II: Schizophrenia. Am J Hum Genet 73(1):34-48.
GABRP	gamma-aminobutyric acid (GABA) A receptor, pi	linkage/association studies	Lewis et al.,, (2003): Genome scan meta-analysis of schizophrenia and bipolar disorder, part II: Schizophrenia. Am J Hum Genet 73(1):34-48.
GAD1	glutamate decarboxylase 1	functional genomics	Ayalew M et al., (2012): Convergent functional genomics of schizophrenia: from comprehensive understanding to genetic risk prediction. Mol Psychiatry 17(9):887-905.
GALK1	galactokinase 1	methylation	Montano et al.,, (2016): Association of DNA Methylation Differences With Schizophrenia in an Epigenome-Wide Association Study. JAMA Psychiatry 73(5):506-14.
GALNT10	polypeptide N-acetylgalactosaminyltransferase 10	GWAS	Schizophrenia Working Group of the Psychiatric Genomics Consortium, (2014): Biological insights from 108 schizophrenia-associated genetic loci. Nature 511(7510):421-7.
GAP43	growth associated protein 43	WES	Purcell et al., (2014): A polygenic burden of rare disruptive mutations in schizophrenia. Nature 506:185-190.
GAPDH	glyceraldehyde-3-phosphate dehydrogenase	WES	Purcell et al., (2014): A polygenic burden of rare disruptive mutations in schizophrenia. Nature 506:185-190.
GARNL3	GTPase activating Rap/RanGAP domain like 3	WES	Purcell et al., (2014): A polygenic burden of rare disruptive mutations in schizophrenia. Nature 506:185-190.
GAS7	growth arrest specific 7	methylation	Aberg KA et al., (2014): Methylome-wide association study of schizophrenia: identifying blood biomarker signatures of environmental insults. JAMA Psychiatry 71(3):255-264.
GATAD2A	GATA zinc finger domain containing 2A	GWAS	Schizophrenia Working Group of the Psychiatric Genomics Consortium, (2014): Biological insights from 108 schizophrenia-associated genetic loci. Nature 511(7510):421-7.
GBA	glucosylceramidase beta	WES	Fromer et al.,, (2014): De novo mutations in schizophrenia implicate synaptic networks. Nature 506(7487):179-84.
GBAS	glioblastoma amplified sequence	WES	Purcell et al., (2014): A polygenic burden of rare disruptive mutations in schizophrenia. Nature 506:185-190.
GBF1	golgi brefeldin A resistant guanine nucleotide exchange factor 1	WES	Purcell et al., (2014): A polygenic burden of rare disruptive mutations in schizophrenia. Nature 506:185-190.
GC	group-specific component (vitamin D binding protein)	linkage/association studies	Lewis et al.,, (2003): Genome scan meta-analysis of schizophrenia and bipolar disorder, part II: Schizophrenia. Am J Hum Genet 73(1):34-48.
GCLM	glutamate-cysteine ligase, modifier subunit	linkage/association studies	Lewis et al.,, (2003): Genome scan meta-analysis of schizophrenia and bipolar disorder, part II: Schizophrenia. Am J Hum Genet 73(1):34-48.
GCN1L1	GCN1, eIF2 alpha kinase activator homolog	WES	Purcell et al., (2014): A polygenic burden of rare disruptive mutations in schizophrenia. Nature 506:185-190.
GDAP2	ganglioside induced differentiation associated protein 2	WES	Fromer et al.,, (2014): De novo mutations in schizophrenia implicate synaptic networks. Nature 506(7487):179-84.
GDI1	GDP dissociation inhibitor 1	WES	Purcell et al., (2014): A polygenic burden of rare disruptive mutations in schizophrenia. Nature 506:185-190.
GDI2	GDP dissociation inhibitor 2	methylation	Montano et al.,, (2016): Association of DNA Methylation Differences With Schizophrenia in an Epigenome-Wide Association Study. JAMA Psychiatry 73(5):506-14.
GDNF	glial cell derived neurotrophic factor	functional study	Tunca et al.,, (2015): Diverse glial cell line-derived neurotrophic factor (GDNF) support between mania and schizophrenia: a comparative study in four major psychiatric disorders. Eur Psychiatry 30(2):198-204. Williams et al.,, (2007): Association analysis of the glial cell line-derived neurotrophic factor (GDNF) gene in schizophrenia. Schizophr Res 97(1-3):271-6. Michelato et al.,, (2004): 3' UT…
GDPD3	glycerophosphodiester phosphodiesterase domain containing 3	GWAS	Schizophrenia Working Group of the Psychiatric Genomics Consortium, (2014): Biological insights from 108 schizophrenia-associated genetic loci. Nature 511(7510):421-7.
GDPD5	glycerophosphodiester phosphodiesterase domain containing 5	WES	Fromer et al.,, (2014): De novo mutations in schizophrenia implicate synaptic networks. Nature 506(7487):179-84.
GEMIN5	gem nuclear organelle associated protein 5	WES	Fromer et al.,, (2014): De novo mutations in schizophrenia implicate synaptic networks. Nature 506(7487):179-84.
GET4	golgi to ER traffic protein 4	methylation	Montano et al.,, (2016): Association of DNA Methylation Differences With Schizophrenia in an Epigenome-Wide Association Study. JAMA Psychiatry 73(5):506-14.
GFAP	glial fibrillary acidic protein	WES	Purcell et al., (2014): A polygenic burden of rare disruptive mutations in schizophrenia. Nature 506:185-190.
GFI1	growth factor independent 1 transcriptional repressor	methylation	Montano et al.,, (2016): Association of DNA Methylation Differences With Schizophrenia in an Epigenome-Wide Association Study. JAMA Psychiatry 73(5):506-14.
GFOD1	glucose-fructose oxidoreductase domain containing 1	WES	Fromer et al.,, (2014): De novo mutations in schizophrenia implicate synaptic networks. Nature 506(7487):179-84.
GFOD2	glucose-fructose oxidoreductase domain containing 2	GWAS	Schizophrenia Working Group of the Psychiatric Genomics Consortium, (2014): Biological insights from 108 schizophrenia-associated genetic loci. Nature 511(7510):421-7.
GFRA3	GDNF family receptor alpha 3	GWAS	Schizophrenia Working Group of the Psychiatric Genomics Consortium, (2014): Biological insights from 108 schizophrenia-associated genetic loci. Nature 511(7510):421-7.
GID4	GID complex subunit 4	GWAS	Schizophrenia Working Group of the Psychiatric Genomics Consortium, (2014): Biological insights from 108 schizophrenia-associated genetic loci. Nature 511(7510):421-7.
GIF	gastric intrinsic factor	WES	Purcell et al., (2014): A polygenic burden of rare disruptive mutations in schizophrenia. Nature 506:185-190.
GIGYF2	GRB10 interacting GYF protein 2	GWAS	Schizophrenia Working Group of the Psychiatric Genomics Consortium, (2014): Biological insights from 108 schizophrenia-associated genetic loci. Nature 511(7510):421-7.
GIMAP8	GTPase, IMAP family member 8	WES	Fromer et al.,, (2014): De novo mutations in schizophrenia implicate synaptic networks. Nature 506(7487):179-84.
GIT1	GIT ArfGAP 1	WES	Fromer et al.,, (2014): De novo mutations in schizophrenia implicate synaptic networks. Nature 506(7487):179-84.
GJA1	gap junction protein alpha 1	WES	Purcell et al., (2014): A polygenic burden of rare disruptive mutations in schizophrenia. Nature 506:185-190.
GJA5	gap junction protein alpha 5	CNV-bearing	Luo et al.,, (2014): Systematic prioritization and integrative analysis of copy number variations in schizophrenia reveal key schizophrenia susceptibility genes. Schizophr Bull 40(6):1285-99.
GJA8	gap junction protein, alpha 8, 50kDa	linkage/association studies	Lewis et al.,, (2003): Genome scan meta-analysis of schizophrenia and bipolar disorder, part II: Schizophrenia. Am J Hum Genet 73(1):34-48.
GJA8	gap junction protein alpha 8	CNV-bearing	Luo et al.,, (2014): Systematic prioritization and integrative analysis of copy number variations in schizophrenia reveal key schizophrenia susceptibility genes. Schizophr Bull 40(6):1285-99.
GLB1	galactosidase beta 1	WES	Fromer et al.,, (2014): De novo mutations in schizophrenia implicate synaptic networks. Nature 506(7487):179-84.
GLI2	GLI family zinc finger 2	WES	Fromer et al.,, (2014): De novo mutations in schizophrenia implicate synaptic networks. Nature 506(7487):179-84.
GLI3	GLI family zinc finger 3	WES	Fromer et al.,, (2014): De novo mutations in schizophrenia implicate synaptic networks. Nature 506(7487):179-84.
GLT8D1	glycosyltransferase 8 domain containing 1	GWAS	Schizophrenia Working Group of the Psychiatric Genomics Consortium, (2014): Biological insights from 108 schizophrenia-associated genetic loci. Nature 511(7510):421-7.
GLUD1	glutamate dehydrogenase 1	WES	Purcell et al., (2014): A polygenic burden of rare disruptive mutations in schizophrenia. Nature 506:185-190.
GLUL	glutamate-ammonia ligase	WES	Purcell et al., (2014): A polygenic burden of rare disruptive mutations in schizophrenia. Nature 506:185-190.
GMDS	GDP-mannose 4,6-dehydratase	methylation	Aberg KA et al., (2014): Methylome-wide association study of schizophrenia: identifying blood biomarker signatures of environmental insults. JAMA Psychiatry 71(3):255-264.
GNA13	G protein subunit alpha 13	WES	Purcell et al., (2014): A polygenic burden of rare disruptive mutations in schizophrenia. Nature 506:185-190.
GNAI2	G protein subunit alpha i2	WES	Purcell et al., (2014): A polygenic burden of rare disruptive mutations in schizophrenia. Nature 506:185-190.
GNAL	G protein subunit alpha L	WES	Purcell et al., (2014): A polygenic burden of rare disruptive mutations in schizophrenia. Nature 506:185-190.
GNAO1	G protein subunit alpha o1	WES	Purcell et al., (2014): A polygenic burden of rare disruptive mutations in schizophrenia. Nature 506:185-190.
GNAS	GNAS complex locus	WES	Fromer et al.,, (2014): De novo mutations in schizophrenia implicate synaptic networks. Nature 506(7487):179-84.
GNAZ	G protein subunit alpha z	WES	Purcell et al., (2014): A polygenic burden of rare disruptive mutations in schizophrenia. Nature 506:185-190.
GNB1	G protein subunit beta 1	WES	Purcell et al., (2014): A polygenic burden of rare disruptive mutations in schizophrenia. Nature 506:185-190.
GNB1L	guanine nucleotide binding protein (G protein), beta polypeptide 1-like	functional genomics	Ayalew M et al., (2012): Convergent functional genomics of schizophrenia: from comprehensive understanding to genetic risk prediction. Mol Psychiatry 17(9):887-905.
GNB2	G protein subunit beta 2	WES	Fromer et al.,, (2014): De novo mutations in schizophrenia implicate synaptic networks. Nature 506(7487):179-84.
GNB4	G protein subunit beta 4	methylation	Montano et al.,, (2016): Association of DNA Methylation Differences With Schizophrenia in an Epigenome-Wide Association Study. JAMA Psychiatry 73(5):506-14.
GNB5	G protein subunit beta 5	WES	Fromer et al.,, (2014): De novo mutations in schizophrenia implicate synaptic networks. Nature 506(7487):179-84.
GNL1	G protein nucleolar 1 (putative)	WES	Purcell et al., (2014): A polygenic burden of rare disruptive mutations in schizophrenia. Nature 506:185-190.
GNL3	guanine nucleotide binding protein-like 3 (nucleolar)	GWAS	Schizophrenia Working Group of the Psychiatric Genomics Consortium, (2014): Biological insights from 108 schizophrenia-associated genetic loci. Nature 511(7510):421-7.
GNPAT	glyceronephosphate O-acyltransferase	WES	Purcell et al., (2014): A polygenic burden of rare disruptive mutations in schizophrenia. Nature 506:185-190.
GNPTG	N-acetylglucosamine-1-phosphate transferase gamma subunit	WES	Fromer et al.,, (2014): De novo mutations in schizophrenia implicate synaptic networks. Nature 506(7487):179-84.
GOLGA6L4	golgin A6 family-like 4	GWAS	Schizophrenia Working Group of the Psychiatric Genomics Consortium, (2014): Biological insights from 108 schizophrenia-associated genetic loci. Nature 511(7510):421-7.
GOLGA6L5P	golgin A6 family-like 5, pseudogene	GWAS	Schizophrenia Working Group of the Psychiatric Genomics Consortium, (2014): Biological insights from 108 schizophrenia-associated genetic loci. Nature 511(7510):421-7.
GOLGA7	golgin A7	methylation	Montano et al.,, (2016): Association of DNA Methylation Differences With Schizophrenia in an Epigenome-Wide Association Study. JAMA Psychiatry 73(5):506-14.
GOT1	glutamic-oxaloacetic transaminase 1	WES	Purcell et al., (2014): A polygenic burden of rare disruptive mutations in schizophrenia. Nature 506:185-190.
GPAM	glycerol-3-phosphate acyltransferase, mitochondrial	WES	Purcell et al., (2014): A polygenic burden of rare disruptive mutations in schizophrenia. Nature 506:185-190.
GPHN	gephyrin	WES	Purcell et al., (2014): A polygenic burden of rare disruptive mutations in schizophrenia. Nature 506:185-190.
GPI	glucose-6-phosphate isomerase	WES	Purcell et al., (2014): A polygenic burden of rare disruptive mutations in schizophrenia. Nature 506:185-190.
GPM6A	glycoprotein M6A	GWAS	Schizophrenia Working Group of the Psychiatric Genomics Consortium, (2014): Biological insights from 108 schizophrenia-associated genetic loci. Nature 511(7510):421-7.
GPR115	adhesion G protein-coupled receptor F4	WES	Purcell et al., (2014): A polygenic burden of rare disruptive mutations in schizophrenia. Nature 506:185-190.
GPR153	G protein-coupled receptor 153	WES	Purcell et al., (2014): A polygenic burden of rare disruptive mutations in schizophrenia. Nature 506:185-190.
GPR158	G protein-coupled receptor 158	WES	Purcell et al., (2014): A polygenic burden of rare disruptive mutations in schizophrenia. Nature 506:185-190.
GPR162	G protein-coupled receptor 162	WES	Purcell et al., (2014): A polygenic burden of rare disruptive mutations in schizophrenia. Nature 506:185-190.
GPRC5B	G protein-coupled receptor class C group 5 member B	WES	Purcell et al., (2014): A polygenic burden of rare disruptive mutations in schizophrenia. Nature 506:185-190.
GPRIN1	G protein regulated inducer of neurite outgrowth 1	WES	Purcell et al., (2014): A polygenic burden of rare disruptive mutations in schizophrenia. Nature 506:185-190.
GPRIN3	GPRIN family member 3	WES	Purcell et al., (2014): A polygenic burden of rare disruptive mutations in schizophrenia. Nature 506:185-190.
GPX5	glutathione peroxidase 5	GWAS	Schizophrenia Working Group of the Psychiatric Genomics Consortium, (2014): Biological insights from 108 schizophrenia-associated genetic loci. Nature 511(7510):421-7.
GPX6	glutathione peroxidase 6	GWAS	Schizophrenia Working Group of the Psychiatric Genomics Consortium, (2014): Biological insights from 108 schizophrenia-associated genetic loci. Nature 511(7510):421-7.
GRAMD1B	GRAM domain containing 1B	GWAS	Schizophrenia Working Group of the Psychiatric Genomics Consortium, (2014): Biological insights from 108 schizophrenia-associated genetic loci. Nature 511(7510):421-7.
GRIA1	glutamate receptor, ionotropic, AMPA 1	GWAS	Schizophrenia Working Group of the Psychiatric Genomics Consortium, (2014): Biological insights from 108 schizophrenia-associated genetic loci. Nature 511(7510):421-7.
GRIA3	glutamate ionotropic receptor AMPA type subunit 3	WES	Purcell et al., (2014): A polygenic burden of rare disruptive mutations in schizophrenia. Nature 506:185-190.
GRIA4	glutamate receptor, ionotropic, AMPA 4	functional genomics	Ayalew M et al., (2012): Convergent functional genomics of schizophrenia: from comprehensive understanding to genetic risk prediction. Mol Psychiatry 17(9):887-905.
GRID1	glutamate receptor, ionotropic, delta 1	linkage/association studies	Lewis et al.,, (2003): Genome scan meta-analysis of schizophrenia and bipolar disorder, part II: Schizophrenia. Am J Hum Genet 73(1):34-48.
GRID2	glutamate ionotropic receptor delta type subunit 2	WES	Fromer et al.,, (2014): De novo mutations in schizophrenia implicate synaptic networks. Nature 506(7487):179-84.
GRIK3	glutamate receptor, ionotropic, kainate 3	linkage/association studies	Allen et al., (2008): Systematic meta-analyses and field synopsis of genetic association studies in schizophrenia: the SzGene database. Nat Genet 40(7):827-34.
GRIK4	glutamate receptor, ionotropic, kainate 4	linkage/association studies	Lewis et al.,, (2003): Genome scan meta-analysis of schizophrenia and bipolar disorder, part II: Schizophrenia. Am J Hum Genet 73(1):34-48.
GRIK5	glutamate ionotropic receptor kainate type subunit 5	WES	Purcell et al., (2014): A polygenic burden of rare disruptive mutations in schizophrenia. Nature 506:185-190.
GRIN1	glutamate receptor, ionotropic, N-methyl D-aspartate 1	linkage/association studies	Lewis et al.,, (2003): Genome scan meta-analysis of schizophrenia and bipolar disorder, part II: Schizophrenia. Am J Hum Genet 73(1):34-48.
GRIN2A	glutamate receptor, ionotropic, N-methyl D-aspartate 2A	GWAS	Schizophrenia Working Group of the Psychiatric Genomics Consortium, (2014): Biological insights from 108 schizophrenia-associated genetic loci. Nature 511(7510):421-7.
GRIN2B	glutamate receptor, ionotropic, N-methyl D-aspartate 2B	functional genomics	Ayalew M et al., (2012): Convergent functional genomics of schizophrenia: from comprehensive understanding to genetic risk prediction. Mol Psychiatry 17(9):887-905.
GRIN2D	glutamate ionotropic receptor NMDA type subunit 2D	WES	Purcell et al., (2014): A polygenic burden of rare disruptive mutations in schizophrenia. Nature 506:185-190.
GRM3	glutamate receptor, metabotropic 3	GWAS	Schizophrenia Working Group of the Psychiatric Genomics Consortium, (2014): Biological insights from 108 schizophrenia-associated genetic loci. Nature 511(7510):421-7.
GRM4	glutamate metabotropic receptor 4	WES	Purcell et al., (2014): A polygenic burden of rare disruptive mutations in schizophrenia. Nature 506:185-190.
GRM5	glutamate receptor, metabotropic 5	functional genomics	Ayalew M et al., (2012): Convergent functional genomics of schizophrenia: from comprehensive understanding to genetic risk prediction. Mol Psychiatry 17(9):887-905.
GRM7	glutamate receptor, metabotropic 7	linkage/association studies	Lewis et al.,, (2003): Genome scan meta-analysis of schizophrenia and bipolar disorder, part II: Schizophrenia. Am J Hum Genet 73(1):34-48.
GSK3B	glycogen synthase kinase 3 beta	linkage/association studies	Lewis et al.,, (2003): Genome scan meta-analysis of schizophrenia and bipolar disorder, part II: Schizophrenia. Am J Hum Genet 73(1):34-48.
GSN	gelsolin	functional genomics	Ayalew M et al., (2012): Convergent functional genomics of schizophrenia: from comprehensive understanding to genetic risk prediction. Mol Psychiatry 17(9):887-905.
GSR	glutathione reductase	linkage/association studies	Ng et al.,, (2009): Meta-analysis of 32 genome-wide linkage studies of schizophrenia. Mol Psychiatry 14(8):774-85.
GSS	glutathione synthetase	linkage/association studies	Lewis et al.,, (2003): Genome scan meta-analysis of schizophrenia and bipolar disorder, part II: Schizophrenia. Am J Hum Genet 73(1):34-48.
GSTM1	glutathione S-transferase mu 1	linkage/association studies	Allen et al., (2008): Systematic meta-analyses and field synopsis of genetic association studies in schizophrenia: the SzGene database. Nat Genet 40(7):827-34.
GSTM3	glutathione S-transferase mu 3 (brain)	WES	Purcell et al., (2014): A polygenic burden of rare disruptive mutations in schizophrenia. Nature 506:185-190.
GTF3C1	general transcription factor IIIC subunit 1	WES	Purcell et al., (2014): A polygenic burden of rare disruptive mutations in schizophrenia. Nature 506:185-190.
GTF3C2	general transcription factor IIIC subunit 2	WES	Fromer et al.,, (2014): De novo mutations in schizophrenia implicate synaptic networks. Nature 506(7487):179-84.
GTPBP3	GTP binding protein 3 (mitochondrial)	WES	Fromer et al.,, (2014): De novo mutations in schizophrenia implicate synaptic networks. Nature 506(7487):179-84.
GTPBP5	mitochondrial ribosome associated GTPase 2	WES	Fromer et al.,, (2014): De novo mutations in schizophrenia implicate synaptic networks. Nature 506(7487):179-84.
GULOP	gulonolactone (L-) oxidase, pseudogene	GWAS	Schizophrenia Working Group of the Psychiatric Genomics Consortium, (2014): Biological insights from 108 schizophrenia-associated genetic loci. Nature 511(7510):421-7.
GXYLT1	glucoside xylosyltransferase 1	WES	Fromer et al.,, (2014): De novo mutations in schizophrenia implicate synaptic networks. Nature 506(7487):179-84.
GXYLT2	glucoside xylosyltransferase 2	methylation	Montano et al.,, (2016): Association of DNA Methylation Differences With Schizophrenia in an Epigenome-Wide Association Study. JAMA Psychiatry 73(5):506-14.
H2AFV	H2A histone family member V	WES	Purcell et al., (2014): A polygenic burden of rare disruptive mutations in schizophrenia. Nature 506:185-190.
HADHA	hydroxyacyl-CoA dehydrogenase/3-ketoacyl-CoA thiolase/enoyl-CoA hydratase (trifunctional protein), alpha subunit	WES	Purcell et al., (2014): A polygenic burden of rare disruptive mutations in schizophrenia. Nature 506:185-190.
HADHB	hydroxyacyl-CoA dehydrogenase/3-ketoacyl-CoA thiolase/enoyl-CoA hydratase (trifunctional protein), beta subunit	WES	Purcell et al., (2014): A polygenic burden of rare disruptive mutations in schizophrenia. Nature 506:185-190.
HAPLN2	hyaluronan and proteoglycan link protein 2	WES	Fromer et al.,, (2014): De novo mutations in schizophrenia implicate synaptic networks. Nature 506(7487):179-84.
HAPLN4	hyaluronan and proteoglycan link protein 4	GWAS	Schizophrenia Working Group of the Psychiatric Genomics Consortium, (2014): Biological insights from 108 schizophrenia-associated genetic loci. Nature 511(7510):421-7.
HARBI1	harbinger transposase derived 1	GWAS	Schizophrenia Working Group of the Psychiatric Genomics Consortium, (2014): Biological insights from 108 schizophrenia-associated genetic loci. Nature 511(7510):421-7.
HARS	histidyl-tRNA synthetase	GWAS	Schizophrenia Working Group of the Psychiatric Genomics Consortium, (2014): Biological insights from 108 schizophrenia-associated genetic loci. Nature 511(7510):421-7.
HARS2	histidyl-tRNA synthetase 2, mitochondrial	GWAS	Schizophrenia Working Group of the Psychiatric Genomics Consortium, (2014): Biological insights from 108 schizophrenia-associated genetic loci. Nature 511(7510):421-7.
HAUS6	HAUS augmin like complex subunit 6	WES	Fromer et al.,, (2014): De novo mutations in schizophrenia implicate synaptic networks. Nature 506(7487):179-84.
HAUS8	HAUS augmin like complex subunit 8	WES	Fromer et al.,, (2014): De novo mutations in schizophrenia implicate synaptic networks. Nature 506(7487):179-84.
HCFC1	host cell factor C1	WES	Purcell et al., (2014): A polygenic burden of rare disruptive mutations in schizophrenia. Nature 506:185-190.
HCK	HCK proto-oncogene, Src family tyrosine kinase	WES	Purcell et al., (2014): A polygenic burden of rare disruptive mutations in schizophrenia. Nature 506:185-190.
HCN1	hyperpolarization activated cyclic nucleotide gated potassium channel 1	GWAS	Schizophrenia Working Group of the Psychiatric Genomics Consortium, (2014): Biological insights from 108 schizophrenia-associated genetic loci. Nature 511(7510):421-7.
HCN2	hyperpolarization activated cyclic nucleotide gated potassium channel 2	WES	Purcell et al., (2014): A polygenic burden of rare disruptive mutations in schizophrenia. Nature 506:185-190.
HDAC4	histone deacetylase 4	WES	Purcell et al., (2014): A polygenic burden of rare disruptive mutations in schizophrenia. Nature 506:185-190.
HDAC5	histone deacetylase 5	WES	Purcell et al., (2014): A polygenic burden of rare disruptive mutations in schizophrenia. Nature 506:185-190.
HDLBP	high density lipoprotein binding protein	WES	Purcell et al., (2014): A polygenic burden of rare disruptive mutations in schizophrenia. Nature 506:185-190.
HEATR5B	HEAT repeat containing 5B	WES	Fromer et al.,, (2014): De novo mutations in schizophrenia implicate synaptic networks. Nature 506(7487):179-84.
HECTD1	HECT domain E3 ubiquitin protein ligase 1	WES	Purcell et al., (2014): A polygenic burden of rare disruptive mutations in schizophrenia. Nature 506:185-190.
HERC1	HECT and RLD domain containing E3 ubiquitin protein ligase family member 1	WES	Purcell et al., (2014): A polygenic burden of rare disruptive mutations in schizophrenia. Nature 506:185-190.
HERC2	HECT and RLD domain containing E3 ubiquitin protein ligase 2	WES	Purcell et al., (2014): A polygenic burden of rare disruptive mutations in schizophrenia. Nature 506:185-190.
HES1	hes family bHLH transcription factor 1	methylation	Montano et al.,, (2016): Association of DNA Methylation Differences With Schizophrenia in an Epigenome-Wide Association Study. JAMA Psychiatry 73(5):506-14.
HINT1	histidine triad nucleotide binding protein 1	functional genomics	Ayalew M et al., (2012): Convergent functional genomics of schizophrenia: from comprehensive understanding to genetic risk prediction. Mol Psychiatry 17(9):887-905.
HIPK1	homeodomain interacting protein kinase 1	WES	Purcell et al., (2014): A polygenic burden of rare disruptive mutations in schizophrenia. Nature 506:185-190.
HIPK2	homeodomain interacting protein kinase 2	WES	Purcell et al., (2014): A polygenic burden of rare disruptive mutations in schizophrenia. Nature 506:185-190.
HIPK3	homeodomain interacting protein kinase 3	WES	Purcell et al., (2014): A polygenic burden of rare disruptive mutations in schizophrenia. Nature 506:185-190.
HIRIP3	HIRA interacting protein 3	GWAS	Schizophrenia Working Group of the Psychiatric Genomics Consortium, (2014): Biological insights from 108 schizophrenia-associated genetic loci. Nature 511(7510):421-7.
HIST1H1E	histone cluster 1, H1e	WES	Purcell et al., (2014): A polygenic burden of rare disruptive mutations in schizophrenia. Nature 506:185-190.
HIST1H2AG	histone cluster 1, H2ag	WES	Purcell et al., (2014): A polygenic burden of rare disruptive mutations in schizophrenia. Nature 506:185-190.
HIST1H2BE	histone cluster 1, H2be	WES	Fromer et al.,, (2014): De novo mutations in schizophrenia implicate synaptic networks. Nature 506(7487):179-84.
HIST1H2BJ	histone cluster 1, H2bj	GWAS	Schizophrenia Working Group of the Psychiatric Genomics Consortium, (2014): Biological insights from 108 schizophrenia-associated genetic loci. Nature 511(7510):421-7.
HIST1H2BL	histone cluster 1, H2bl	GWAS	Schizophrenia Working Group of the Psychiatric Genomics Consortium, (2014): Biological insights from 108 schizophrenia-associated genetic loci. Nature 511(7510):421-7.
HIST1H3G	histone cluster 1, H3g	WES	Fromer et al.,, (2014): De novo mutations in schizophrenia implicate synaptic networks. Nature 506(7487):179-84.
HIST1H4I	histone cluster 1, H4i	WES	Fromer et al.,, (2014): De novo mutations in schizophrenia implicate synaptic networks. Nature 506(7487):179-84.
HIVEP1	human immunodeficiency virus type I enhancer binding protein 1	WES	Purcell et al., (2014): A polygenic burden of rare disruptive mutations in schizophrenia. Nature 506:185-190.
HIVEP2	human immunodeficiency virus type I enhancer binding protein 2	WES	Purcell et al., (2014): A polygenic burden of rare disruptive mutations in schizophrenia. Nature 506:185-190.
HIVEP3	human immunodeficiency virus type I enhancer binding protein 3	WES	Fromer et al.,, (2014): De novo mutations in schizophrenia implicate synaptic networks. Nature 506(7487):179-84.
HK1	hexokinase 1	WES	Purcell et al., (2014): A polygenic burden of rare disruptive mutations in schizophrenia. Nature 506:185-190.
HLA-C	major histocompatibility complex, class I, C	WES	Purcell et al., (2014): A polygenic burden of rare disruptive mutations in schizophrenia. Nature 506:185-190.
HLA-DRB9	major histocompatibility complex, class II, DR beta 9 (pseudogene)	GWAS	Ripke et al.,, (2013): Genome-wide association analysis identifies 13 new risk loci for schizophrenia. Nat Genet 45(10):1150-9.
HMGCR	3-hydroxy-3-methylglutaryl-CoA reductase	WES	Purcell et al., (2014): A polygenic burden of rare disruptive mutations in schizophrenia. Nature 506:185-190.
HMGN1P10	high mobility group nucleosome binding domain 1 pseudogene 10	GWAS	Schizophrenia Working Group of the Psychiatric Genomics Consortium, (2014): Biological insights from 108 schizophrenia-associated genetic loci. Nature 511(7510):421-7.
HMGXB3	HMG-box containing 3	WES	Purcell et al., (2014): A polygenic burden of rare disruptive mutations in schizophrenia. Nature 506:185-190.
HNRNPA1P16	heterogeneous nuclear ribonucleoprotein A1 pseudogene 16	GWAS	Schizophrenia Working Group of the Psychiatric Genomics Consortium, (2014): Biological insights from 108 schizophrenia-associated genetic loci. Nature 511(7510):421-7.
HNRNPUL1	heterogeneous nuclear ribonucleoprotein U like 1	WES	Purcell et al., (2014): A polygenic burden of rare disruptive mutations in schizophrenia. Nature 506:185-190.
HOMER1	homer scaffolding protein 1	WES	Purcell et al., (2014): A polygenic burden of rare disruptive mutations in schizophrenia. Nature 506:185-190.
HP	haptoglobin	linkage/association studies	Allen et al., (2008): Systematic meta-analyses and field synopsis of genetic association studies in schizophrenia: the SzGene database. Nat Genet 40(7):827-34.
HPS3	HPS3, biogenesis of lysosomal organelles complex 2 subunit 1	WES	Fromer et al.,, (2014): De novo mutations in schizophrenia implicate synaptic networks. Nature 506(7487):179-84.
HR	hair growth associated	linkage/association studies	Ng et al.,, (2009): Meta-analysis of 32 genome-wide linkage studies of schizophrenia. Mol Psychiatry 14(8):774-85.
HRH1	histamine receptor H1	linkage/association studies	Lewis et al.,, (2003): Genome scan meta-analysis of schizophrenia and bipolar disorder, part II: Schizophrenia. Am J Hum Genet 73(1):34-48.
HS6ST1	heparan sulfate 6-O-sulfotransferase 1	methylation	Montano et al.,, (2016): Association of DNA Methylation Differences With Schizophrenia in an Epigenome-Wide Association Study. JAMA Psychiatry 73(5):506-14.
HSD17B4	hydroxysteroid 17-beta dehydrogenase 4	WES	Purcell et al., (2014): A polygenic burden of rare disruptive mutations in schizophrenia. Nature 506:185-190.
HSP90AA1	heat shock protein 90kDa alpha family class A member 1	WES	Fromer et al.,, (2014): De novo mutations in schizophrenia implicate synaptic networks. Nature 506(7487):179-84.
HSP90AB1	heat shock protein 90kDa alpha family class B member 1	WES	Purcell et al., (2014): A polygenic burden of rare disruptive mutations in schizophrenia. Nature 506:185-190.
HSPA12A	heat shock protein family A (Hsp70) member 12A	WES	Purcell et al., (2014): A polygenic burden of rare disruptive mutations in schizophrenia. Nature 506:185-190.
HSPA1B	heat shock 70kDa protein 1B	functional genomics	Ayalew M et al., (2012): Convergent functional genomics of schizophrenia: from comprehensive understanding to genetic risk prediction. Mol Psychiatry 17(9):887-905.
HSPA2	heat shock protein family A (Hsp70) member 2	WES	Purcell et al., (2014): A polygenic burden of rare disruptive mutations in schizophrenia. Nature 506:185-190.
HSPA4	heat shock protein family A (Hsp70) member 4	WES	Purcell et al., (2014): A polygenic burden of rare disruptive mutations in schizophrenia. Nature 506:185-190.
HSPA4L	heat shock protein family A (Hsp70) member 4 like	WES	Purcell et al., (2014): A polygenic burden of rare disruptive mutations in schizophrenia. Nature 506:185-190.
HSPA5	heat shock protein family A (Hsp70) member 5	WES	Purcell et al., (2014): A polygenic burden of rare disruptive mutations in schizophrenia. Nature 506:185-190.
HSPA6	heat shock protein family A (Hsp70) member 6	WES	Purcell et al., (2014): A polygenic burden of rare disruptive mutations in schizophrenia. Nature 506:185-190.
HSPA8	heat shock protein family A (Hsp70) member 8	WES	Fromer et al.,, (2014): De novo mutations in schizophrenia implicate synaptic networks. Nature 506(7487):179-84.
HSPA9	heat shock 70kDa protein 9 (mortalin)	GWAS	Schizophrenia Working Group of the Psychiatric Genomics Consortium, (2014): Biological insights from 108 schizophrenia-associated genetic loci. Nature 511(7510):421-7.
HSPB1	heat shock protein family B (small) member 1	WES	Purcell et al., (2014): A polygenic burden of rare disruptive mutations in schizophrenia. Nature 506:185-190.
HSPD1	heat shock 60kDa protein 1 (chaperonin)	GWAS	Schizophrenia Working Group of the Psychiatric Genomics Consortium, (2014): Biological insights from 108 schizophrenia-associated genetic loci. Nature 511(7510):421-7.
HSPE1	heat shock 10kDa protein 1	GWAS	Schizophrenia Working Group of the Psychiatric Genomics Consortium, (2014): Biological insights from 108 schizophrenia-associated genetic loci. Nature 511(7510):421-7.
HSPE1-MOB4	HSPE1-MOB4 readthrough	GWAS	Schizophrenia Working Group of the Psychiatric Genomics Consortium, (2014): Biological insights from 108 schizophrenia-associated genetic loci. Nature 511(7510):421-7.
HSPH1	heat shock protein family H (Hsp110) member 1	WES	Purcell et al., (2014): A polygenic burden of rare disruptive mutations in schizophrenia. Nature 506:185-190.
HTATSF1	HIV-1 Tat specific factor 1	WES	Fromer et al.,, (2014): De novo mutations in schizophrenia implicate synaptic networks. Nature 506(7487):179-84.
HTR1A	5-hydroxytryptamine (serotonin) receptor 1A, G protein-coupled	linkage/association studies	Lewis et al.,, (2003): Genome scan meta-analysis of schizophrenia and bipolar disorder, part II: Schizophrenia. Am J Hum Genet 73(1):34-48.
HTR2A	5-hydroxytryptamine (serotonin) receptor 2A, G protein-coupled	functional genomics	Ayalew M et al., (2012): Convergent functional genomics of schizophrenia: from comprehensive understanding to genetic risk prediction. Mol Psychiatry 17(9):887-905.
HTR3A	5-hydroxytryptamine (serotonin) receptor 3A, ionotropic	linkage/association studies	Lewis et al.,, (2003): Genome scan meta-analysis of schizophrenia and bipolar disorder, part II: Schizophrenia. Am J Hum Genet 73(1):34-48.
HTR4	5-hydroxytryptamine (serotonin) receptor 4, G protein-coupled	linkage/association studies	Lewis et al.,, (2003): Genome scan meta-analysis of schizophrenia and bipolar disorder, part II: Schizophrenia. Am J Hum Genet 73(1):34-48.
HTR5A	5-hydroxytryptamine (serotonin) receptor 5A, G protein-coupled	linkage/association studies	Lewis et al.,, (2003): Genome scan meta-analysis of schizophrenia and bipolar disorder, part II: Schizophrenia. Am J Hum Genet 73(1):34-48.
HTR7	5-hydroxytryptamine receptor 7	WES	Purcell et al., (2014): A polygenic burden of rare disruptive mutations in schizophrenia. Nature 506:185-190.
HTT	huntingtin	WES	Fromer et al.,, (2014): De novo mutations in schizophrenia implicate synaptic networks. Nature 506(7487):179-84.
HUWE1	HECT, UBA and WWE domain containing 1, E3 ubiquitin protein ligase	WES	Fromer et al.,, (2014): De novo mutations in schizophrenia implicate synaptic networks. Nature 506(7487):179-84.
ICAM3	intercellular adhesion molecule 3	methylation	Montano et al.,, (2016): Association of DNA Methylation Differences With Schizophrenia in an Epigenome-Wide Association Study. JAMA Psychiatry 73(5):506-14.
IDH2	isocitrate dehydrogenase (NADP(+)) 2, mitochondrial	WES	Purcell et al., (2014): A polygenic burden of rare disruptive mutations in schizophrenia. Nature 506:185-190.
IDS	iduronate 2-sulfatase	WES	Purcell et al., (2014): A polygenic burden of rare disruptive mutations in schizophrenia. Nature 506:185-190.
IER2	immediate early response 2	WES	Fromer et al.,, (2014): De novo mutations in schizophrenia implicate synaptic networks. Nature 506(7487):179-84.
IFITM1	interferon induced transmembrane protein 1	methylation	Montano et al.,, (2016): Association of DNA Methylation Differences With Schizophrenia in an Epigenome-Wide Association Study. JAMA Psychiatry 73(5):506-14.
IFNAR2	interferon alpha and beta receptor subunit 2	WES	Fromer et al.,, (2014): De novo mutations in schizophrenia implicate synaptic networks. Nature 506(7487):179-84.
IFT122	intraflagellar transport 122	methylation	Montano et al.,, (2016): Association of DNA Methylation Differences With Schizophrenia in an Epigenome-Wide Association Study. JAMA Psychiatry 73(5):506-14.
IFT140	intraflagellar transport 140	WES	Purcell et al., (2014): A polygenic burden of rare disruptive mutations in schizophrenia. Nature 506:185-190.
IFT74	intraflagellar transport 74	GWAS	Schizophrenia Working Group of the Psychiatric Genomics Consortium, (2014): Biological insights from 108 schizophrenia-associated genetic loci. Nature 511(7510):421-7.
IFT81	intraflagellar transport 81	WES	Purcell et al., (2014): A polygenic burden of rare disruptive mutations in schizophrenia. Nature 506:185-190.
IGF2R	insulin like growth factor 2 receptor	methylation	Montano et al.,, (2016): Association of DNA Methylation Differences With Schizophrenia in an Epigenome-Wide Association Study. JAMA Psychiatry 73(5):506-14.
IGFL2	IGF like family member 2	WES	Purcell et al., (2014): A polygenic burden of rare disruptive mutations in schizophrenia. Nature 506:185-190.
IGSF10	immunoglobulin superfamily member 10	WES	Fromer et al.,, (2014): De novo mutations in schizophrenia implicate synaptic networks. Nature 506(7487):179-84.
IGSF22	immunoglobulin superfamily member 22	WES	Fromer et al.,, (2014): De novo mutations in schizophrenia implicate synaptic networks. Nature 506(7487):179-84.
IGSF8	immunoglobulin superfamily member 8	WES	Purcell et al., (2014): A polygenic burden of rare disruptive mutations in schizophrenia. Nature 506:185-190.
IGSF9B	immunoglobulin superfamily, member 9B	GWAS	Schizophrenia Working Group of the Psychiatric Genomics Consortium, (2014): Biological insights from 108 schizophrenia-associated genetic loci. Nature 511(7510):421-7.
IK	IK cytokine, down-regulator of HLA II	GWAS	Schizophrenia Working Group of the Psychiatric Genomics Consortium, (2014): Biological insights from 108 schizophrenia-associated genetic loci. Nature 511(7510):421-7.
IKBIP	IKBKB interacting protein	WES	Fromer et al.,, (2014): De novo mutations in schizophrenia implicate synaptic networks. Nature 506(7487):179-84.
IKZF4	IKAROS family zinc finger 4	methylation	Aberg KA et al., (2014): Methylome-wide association study of schizophrenia: identifying blood biomarker signatures of environmental insults. JAMA Psychiatry 71(3):255-264.
IL10	interleukin 10	linkage/association studies	Allen et al., (2008): Systematic meta-analyses and field synopsis of genetic association studies in schizophrenia: the SzGene database. Nat Genet 40(7):827-34.
IL12B	interleukin 12B	linkage/association studies	Lewis et al.,, (2003): Genome scan meta-analysis of schizophrenia and bipolar disorder, part II: Schizophrenia. Am J Hum Genet 73(1):34-48.
IL18	interleukin 18	linkage/association studies	Lewis et al.,, (2003): Genome scan meta-analysis of schizophrenia and bipolar disorder, part II: Schizophrenia. Am J Hum Genet 73(1):34-48.
IL18R1	interleukin 18 receptor 1	linkage/association studies	Lewis et al.,, (2003): Genome scan meta-analysis of schizophrenia and bipolar disorder, part II: Schizophrenia. Am J Hum Genet 73(1):34-48.
IL18RAP	interleukin 18 receptor accessory protein	linkage/association studies	Lewis et al.,, (2003): Genome scan meta-analysis of schizophrenia and bipolar disorder, part II: Schizophrenia. Am J Hum Genet 73(1):34-48.
IL1A	interleukin 1, alpha	linkage/association studies	Lewis et al.,, (2003): Genome scan meta-analysis of schizophrenia and bipolar disorder, part II: Schizophrenia. Am J Hum Genet 73(1):34-48.
IL1B	interleukin 1, beta	linkage/association studies	Allen et al., (2008): Systematic meta-analyses and field synopsis of genetic association studies in schizophrenia: the SzGene database. Nat Genet 40(7):827-34.
IL1RN	interleukin 1 receptor antagonist	linkage/association studies	Lewis et al.,, (2003): Genome scan meta-analysis of schizophrenia and bipolar disorder, part II: Schizophrenia. Am J Hum Genet 73(1):34-48.
IL3	interleukin 3	linkage/association studies	Lewis et al.,, (2003): Genome scan meta-analysis of schizophrenia and bipolar disorder, part II: Schizophrenia. Am J Hum Genet 73(1):34-48.
IL36B	interleukin 36, beta	WES	Fromer et al.,, (2014): De novo mutations in schizophrenia implicate synaptic networks. Nature 506(7487):179-84.
IL4	interleukin 4	linkage/association studies	Lewis et al.,, (2003): Genome scan meta-analysis of schizophrenia and bipolar disorder, part II: Schizophrenia. Am J Hum Genet 73(1):34-48.
ILVBL	ilvB (bacterial acetolactate synthase)-like	WES	Fromer et al.,, (2014): De novo mutations in schizophrenia implicate synaptic networks. Nature 506(7487):179-84.
IMMP2L	IMP2 inner mitochondrial membrane peptidase-like (S. cerevisiae)	GWAS	Schizophrenia Working Group of the Psychiatric Genomics Consortium, (2014): Biological insights from 108 schizophrenia-associated genetic loci. Nature 511(7510):421-7.
IMMT	inner membrane mitochondrial protein	WES	Purcell et al., (2014): A polygenic burden of rare disruptive mutations in schizophrenia. Nature 506:185-190.
INA	internexin neuronal intermediate filament protein, alpha	GWAS	Schizophrenia Working Group of the Psychiatric Genomics Consortium, (2014): Biological insights from 108 schizophrenia-associated genetic loci. Nature 511(7510):421-7.
INCENP	inner centromere protein	WES	Fromer et al.,, (2014): De novo mutations in schizophrenia implicate synaptic networks. Nature 506(7487):179-84.
INHA	inhibin, alpha	linkage/association studies	Ng et al.,, (2009): Meta-analysis of 32 genome-wide linkage studies of schizophrenia. Mol Psychiatry 14(8):774-85.
INO80	INO80 complex subunit	WES	Fromer et al.,, (2014): De novo mutations in schizophrenia implicate synaptic networks. Nature 506(7487):179-84.
INO80E	INO80 complex subunit E	GWAS	Schizophrenia Working Group of the Psychiatric Genomics Consortium, (2014): Biological insights from 108 schizophrenia-associated genetic loci. Nature 511(7510):421-7.
INPP4A	inositol polyphosphate-4-phosphatase type I A	WES	Fromer et al.,, (2014): De novo mutations in schizophrenia implicate synaptic networks. Nature 506(7487):179-84.
INPP5A	inositol polyphosphate-5-phosphatase A	WES	Purcell et al., (2014): A polygenic burden of rare disruptive mutations in schizophrenia. Nature 506:185-190.
INPP5D	inositol polyphosphate-5-phosphatase D	methylation	Aberg KA et al., (2014): Methylome-wide association study of schizophrenia: identifying blood biomarker signatures of environmental insults. JAMA Psychiatry 71(3):255-264.
INPP5E	inositol polyphosphate-5-phosphatase E	WES	Fromer et al.,, (2014): De novo mutations in schizophrenia implicate synaptic networks. Nature 506(7487):179-84.
INSIG2	insulin induced gene 2	linkage/association studies	Ng et al.,, (2009): Meta-analysis of 32 genome-wide linkage studies of schizophrenia. Mol Psychiatry 14(8):774-85.
INSRR	insulin receptor related receptor	WES	Fromer et al.,, (2014): De novo mutations in schizophrenia implicate synaptic networks. Nature 506(7487):179-84.
INTS1	integrator complex subunit 1	WES	Purcell et al., (2014): A polygenic burden of rare disruptive mutations in schizophrenia. Nature 506:185-190.
INTS10	integrator complex subunit 10	WES	Purcell et al., (2014): A polygenic burden of rare disruptive mutations in schizophrenia. Nature 506:185-190.
INTS6	integrator complex subunit 6	WES	Fromer et al.,, (2014): De novo mutations in schizophrenia implicate synaptic networks. Nature 506(7487):179-84.
IPO11	importin 11	methylation	Montano et al.,, (2016): Association of DNA Methylation Differences With Schizophrenia in an Epigenome-Wide Association Study. JAMA Psychiatry 73(5):506-14.
IPO13	importin 13	WES	Purcell et al., (2014): A polygenic burden of rare disruptive mutations in schizophrenia. Nature 506:185-190.
IPO4	importin 4	WES	Purcell et al., (2014): A polygenic burden of rare disruptive mutations in schizophrenia. Nature 506:185-190.
IPO5	importin 5	linkage/association studies	Lewis et al.,, (2003): Genome scan meta-analysis of schizophrenia and bipolar disorder, part II: Schizophrenia. Am J Hum Genet 73(1):34-48.
IQSEC1	IQ motif and Sec7 domain 1	WES	Purcell et al., (2014): A polygenic burden of rare disruptive mutations in schizophrenia. Nature 506:185-190.
IQSEC2	IQ motif and Sec7 domain 2	WES	Purcell et al., (2014): A polygenic burden of rare disruptive mutations in schizophrenia. Nature 506:185-190.
IQSEC3	IQ motif and Sec7 domain 3	WES	Fromer et al.,, (2014): De novo mutations in schizophrenia implicate synaptic networks. Nature 506(7487):179-84.
IREB2	iron-responsive element binding protein 2	GWAS	Schizophrenia Working Group of the Psychiatric Genomics Consortium, (2014): Biological insights from 108 schizophrenia-associated genetic loci. Nature 511(7510):421-7.
IRGQ	immunity-related GTPase Q	WES	Purcell et al., (2014): A polygenic burden of rare disruptive mutations in schizophrenia. Nature 506:185-190.
IRS1	insulin receptor substrate 1	methylation	Montano et al.,, (2016): Association of DNA Methylation Differences With Schizophrenia in an Epigenome-Wide Association Study. JAMA Psychiatry 73(5):506-14.
IRS2	insulin receptor substrate 2	WES	Purcell et al., (2014): A polygenic burden of rare disruptive mutations in schizophrenia. Nature 506:185-190.
ITGA2	integrin subunit alpha 2	methylation	Aberg KA et al., (2014): Methylome-wide association study of schizophrenia: identifying blood biomarker signatures of environmental insults. JAMA Psychiatry 71(3):255-264.
ITGA6	integrin subunit alpha 6	WES	Purcell et al., (2014): A polygenic burden of rare disruptive mutations in schizophrenia. Nature 506:185-190.
ITIH1	inter-alpha-trypsin inhibitor heavy chain 1	GWAS	Schizophrenia Working Group of the Psychiatric Genomics Consortium, (2014): Biological insights from 108 schizophrenia-associated genetic loci. Nature 511(7510):421-7.
ITIH3	inter-alpha-trypsin inhibitor heavy chain 3	GWAS	Hamshere et al.,, (2013): Genome-wide significant associations in schizophrenia to ITIH3/4, CACNA1C and SDCCAG8, and extensive replication of associations reported by the Schizophrenia PGC. Mol Psychiatry 18(6):708-12.
ITIH4	inter-alpha-trypsin inhibitor heavy chain family, member 4	GWAS	Hamshere et al.,, (2013): Genome-wide significant associations in schizophrenia to ITIH3/4, CACNA1C and SDCCAG8, and extensive replication of associations reported by the Schizophrenia PGC. Mol Psychiatry 18(6):708-12.
ITIH4-AS1	ITIH4 antisense RNA 1	GWAS	Schizophrenia Working Group of the Psychiatric Genomics Consortium, (2014): Biological insights from 108 schizophrenia-associated genetic loci. Nature 511(7510):421-7.
ITK	IL2-inducible T-cell kinase	linkage/association studies	Ng et al.,, (2009): Meta-analysis of 32 genome-wide linkage studies of schizophrenia. Mol Psychiatry 14(8):774-85.
ITM2B	integral membrane protein 2B	WES	Fromer et al.,, (2014): De novo mutations in schizophrenia implicate synaptic networks. Nature 506(7487):179-84.
ITM2C	integral membrane protein 2C	WES	Fromer et al.,, (2014): De novo mutations in schizophrenia implicate synaptic networks. Nature 506(7487):179-84.
ITPR1	inositol 1,4,5-trisphosphate receptor type 1	WES	Fromer et al.,, (2014): De novo mutations in schizophrenia implicate synaptic networks. Nature 506(7487):179-84.
ITSN1	intersectin 1	WES	Fromer et al.,, (2014): De novo mutations in schizophrenia implicate synaptic networks. Nature 506(7487):179-84.
JAK1	Janus kinase 1	WES	Purcell et al., (2014): A polygenic burden of rare disruptive mutations in schizophrenia. Nature 506:185-190.
JARID2	jumonji, AT rich interactive domain 2	linkage/association studies	Lewis et al.,, (2003): Genome scan meta-analysis of schizophrenia and bipolar disorder, part II: Schizophrenia. Am J Hum Genet 73(1):34-48.
JPH3	junctophilin 3	WES	Fromer et al.,, (2014): De novo mutations in schizophrenia implicate synaptic networks. Nature 506(7487):179-84.
JPH4	junctophilin 4	WES	Purcell et al., (2014): A polygenic burden of rare disruptive mutations in schizophrenia. Nature 506:185-190.
KALRN	kalirin, RhoGEF kinase	functional genomics	Ayalew M et al., (2012): Convergent functional genomics of schizophrenia: from comprehensive understanding to genetic risk prediction. Mol Psychiatry 17(9):887-905.
KARSP3	lysyl-tRNA synthetase pseudogene 3	GWAS	Schizophrenia Working Group of the Psychiatric Genomics Consortium, (2014): Biological insights from 108 schizophrenia-associated genetic loci. Nature 511(7510):421-7.
KBTBD11	kelch repeat and BTB domain containing 11	WES	Purcell et al., (2014): A polygenic burden of rare disruptive mutations in schizophrenia. Nature 506:185-190.
KCNA2	potassium voltage-gated channel subfamily A member 2	WES	Purcell et al., (2014): A polygenic burden of rare disruptive mutations in schizophrenia. Nature 506:185-190.
KCNB1	potassium channel, voltage gated Shab related subfamily B, member 1	GWAS	Schizophrenia Working Group of the Psychiatric Genomics Consortium, (2014): Biological insights from 108 schizophrenia-associated genetic loci. Nature 511(7510):421-7.
KCNC3	potassium voltage-gated channel subfamily C member 3	WES	Purcell et al., (2014): A polygenic burden of rare disruptive mutations in schizophrenia. Nature 506:185-190.
KCND2	potassium voltage-gated channel subfamily D member 2	WES	Purcell et al., (2014): A polygenic burden of rare disruptive mutations in schizophrenia. Nature 506:185-190.
KCNH1	potassium voltage-gated channel subfamily H member 1	WES	Purcell et al., (2014): A polygenic burden of rare disruptive mutations in schizophrenia. Nature 506:185-190.
KCNH3	potassium voltage-gated channel subfamily H member 3	WES	Purcell et al., (2014): A polygenic burden of rare disruptive mutations in schizophrenia. Nature 506:185-190.
KCNH5	potassium voltage-gated channel subfamily H member 5	WES	Fromer et al.,, (2014): De novo mutations in schizophrenia implicate synaptic networks. Nature 506(7487):179-84.
KCNH6	potassium voltage-gated channel subfamily H member 6	WES	Fromer et al.,, (2014): De novo mutations in schizophrenia implicate synaptic networks. Nature 506(7487):179-84.
KCNH7	potassium voltage-gated channel subfamily H member 7	WES	Purcell et al., (2014): A polygenic burden of rare disruptive mutations in schizophrenia. Nature 506:185-190.
KCNJ13	potassium channel, inwardly rectifying subfamily J, member 13	GWAS	Schizophrenia Working Group of the Psychiatric Genomics Consortium, (2014): Biological insights from 108 schizophrenia-associated genetic loci. Nature 511(7510):421-7.
KCNMA1	potassium calcium-activated channel subfamily M alpha 1	WES	Purcell et al., (2014): A polygenic burden of rare disruptive mutations in schizophrenia. Nature 506:185-190.
KCNN3	potassium channel, calcium activated intermediate/small conductance subfamily N alpha, member 3	linkage/association studies	Lewis et al.,, (2003): Genome scan meta-analysis of schizophrenia and bipolar disorder, part II: Schizophrenia. Am J Hum Genet 73(1):34-48.
KCNQ2	potassium voltage-gated channel subfamily Q member 2	WES	Purcell et al., (2014): A polygenic burden of rare disruptive mutations in schizophrenia. Nature 506:185-190.
KCNQ3	potassium voltage-gated channel subfamily Q member 3	WES	Purcell et al., (2014): A polygenic burden of rare disruptive mutations in schizophrenia. Nature 506:185-190.
KCNQ5	potassium voltage-gated channel subfamily Q member 5	WES	Fromer et al.,, (2014): De novo mutations in schizophrenia implicate synaptic networks. Nature 506(7487):179-84.
KCNT1	potassium sodium-activated channel subfamily T member 1	WES	Purcell et al., (2014): A polygenic burden of rare disruptive mutations in schizophrenia. Nature 506:185-190.
KCNV1	potassium channel, voltage gated modifier subfamily V, member 1	GWAS	Schizophrenia Working Group of the Psychiatric Genomics Consortium, (2014): Biological insights from 108 schizophrenia-associated genetic loci. Nature 511(7510):421-7.
KCTD12	potassium channel tetramerization domain containing 12	WES	Purcell et al., (2014): A polygenic burden of rare disruptive mutations in schizophrenia. Nature 506:185-190.
KCTD13	potassium channel tetramerization domain containing 13	GWAS	Schizophrenia Working Group of the Psychiatric Genomics Consortium, (2014): Biological insights from 108 schizophrenia-associated genetic loci. Nature 511(7510):421-7.
KCTD6	potassium channel tetramerization domain containing 6	WES	Fromer et al.,, (2014): De novo mutations in schizophrenia implicate synaptic networks. Nature 506(7487):179-84.
KCTD8	potassium channel tetramerization domain containing 8	WES	Purcell et al., (2014): A polygenic burden of rare disruptive mutations in schizophrenia. Nature 506:185-190.
KDM2B	lysine demethylase 2B	WES	Purcell et al., (2014): A polygenic burden of rare disruptive mutations in schizophrenia. Nature 506:185-190.
KDM3A	lysine demethylase 3A	methylation	Montano et al.,, (2016): Association of DNA Methylation Differences With Schizophrenia in an Epigenome-Wide Association Study. JAMA Psychiatry 73(5):506-14.
KDM3B	lysine (K)-specific demethylase 3B	GWAS	Schizophrenia Working Group of the Psychiatric Genomics Consortium, (2014): Biological insights from 108 schizophrenia-associated genetic loci. Nature 511(7510):421-7.
KDM4A	lysine (K)-specific demethylase 4A	GWAS	Schizophrenia Working Group of the Psychiatric Genomics Consortium, (2014): Biological insights from 108 schizophrenia-associated genetic loci. Nature 511(7510):421-7.
KDM4B	lysine demethylase 4B	WES	Purcell et al., (2014): A polygenic burden of rare disruptive mutations in schizophrenia. Nature 506:185-190.
KDM5C	lysine demethylase 5C	WES	Purcell et al., (2014): A polygenic burden of rare disruptive mutations in schizophrenia. Nature 506:185-190.
KDM6B	lysine demethylase 6B	WES	Purcell et al., (2014): A polygenic burden of rare disruptive mutations in schizophrenia. Nature 506:185-190.
KDSR	3-ketodihydrosphingosine reductase	WES	Fromer et al.,, (2014): De novo mutations in schizophrenia implicate synaptic networks. Nature 506(7487):179-84.
KIAA0125- FAM30A	family with sequence similarity 30, member A	methylation	Montano et al.,, (2016): Association of DNA Methylation Differences With Schizophrenia in an Epigenome-Wide Association Study. JAMA Psychiatry 73(5):506-14.
KIAA0284	centrosomal protein 170B	WES	Purcell et al., (2014): A polygenic burden of rare disruptive mutations in schizophrenia. Nature 506:185-190.
KIAA0319L	KIAA0319 like	WES	Fromer et al.,, (2014): De novo mutations in schizophrenia implicate synaptic networks. Nature 506(7487):179-84.
KIAA0355	KIAA0355	methylation	Montano et al.,, (2016): Association of DNA Methylation Differences With Schizophrenia in an Epigenome-Wide Association Study. JAMA Psychiatry 73(5):506-14.
KIAA0528	C2 calcium-dependent domain containing 5	WES	Purcell et al., (2014): A polygenic burden of rare disruptive mutations in schizophrenia. Nature 506:185-190.
KIAA1045	PHD finger protein 24	WES	Purcell et al., (2014): A polygenic burden of rare disruptive mutations in schizophrenia. Nature 506:185-190.
KIAA1109	KIAA1109	WES	Purcell et al., (2014): A polygenic burden of rare disruptive mutations in schizophrenia. Nature 506:185-190.
KIAA1217	KIAA1217	WES	Purcell et al., (2014): A polygenic burden of rare disruptive mutations in schizophrenia. Nature 506:185-190.
KIAA1244	ARFGEF family member 3	WES	Fromer et al.,, (2014): De novo mutations in schizophrenia implicate synaptic networks. Nature 506(7487):179-84.
KIAA1429	KIAA1429	WES	Fromer et al.,, (2014): De novo mutations in schizophrenia implicate synaptic networks. Nature 506(7487):179-84.
KIAA1462	KIAA1462	WES	Fromer et al.,, (2014): De novo mutations in schizophrenia implicate synaptic networks. Nature 506(7487):179-84.
KIAA1755	KIAA1755	WES	Fromer et al.,, (2014): De novo mutations in schizophrenia implicate synaptic networks. Nature 506(7487):179-84.
KIAA2018	upstream transcription factor family member 3	WES	Fromer et al.,, (2014): De novo mutations in schizophrenia implicate synaptic networks. Nature 506(7487):179-84.
KIF13B	kinesin family member 13B	WES	Fromer et al.,, (2014): De novo mutations in schizophrenia implicate synaptic networks. Nature 506(7487):179-84.
KIF14	kinesin family member 14	WES	Fromer et al.,, (2014): De novo mutations in schizophrenia implicate synaptic networks. Nature 506(7487):179-84.
KIF18A	kinesin family member 18A	WES	Fromer et al.,, (2014): De novo mutations in schizophrenia implicate synaptic networks. Nature 506(7487):179-84.
KIF1A	kinesin family member 1A	WES	Fromer et al.,, (2014): De novo mutations in schizophrenia implicate synaptic networks. Nature 506(7487):179-84.
KIF1B	kinesin family member 1B	WES	Purcell et al., (2014): A polygenic burden of rare disruptive mutations in schizophrenia. Nature 506:185-190.
KIF20B	kinesin family member 20B	WES	Fromer et al.,, (2014): De novo mutations in schizophrenia implicate synaptic networks. Nature 506(7487):179-84.
KIF21A	kinesin family member 21A	WES	Purcell et al., (2014): A polygenic burden of rare disruptive mutations in schizophrenia. Nature 506:185-190.
KIF21B	kinesin family member 21B	WES	Purcell et al., (2014): A polygenic burden of rare disruptive mutations in schizophrenia. Nature 506:185-190.
KIF26B	kinesin family member 26B	WES	Fromer et al.,, (2014): De novo mutations in schizophrenia implicate synaptic networks. Nature 506(7487):179-84.
KIF2A	kinesin heavy chain member 2A	functional genomics	Ayalew M et al., (2012): Convergent functional genomics of schizophrenia: from comprehensive understanding to genetic risk prediction. Mol Psychiatry 17(9):887-905.
KIF3A	kinesin family member 3A	WES	Fromer et al.,, (2014): De novo mutations in schizophrenia implicate synaptic networks. Nature 506(7487):179-84.
KIF3C	kinesin family member 3C	WES	Purcell et al., (2014): A polygenic burden of rare disruptive mutations in schizophrenia. Nature 506:185-190.
KIF5A	kinesin family member 5A	WES	Purcell et al., (2014): A polygenic burden of rare disruptive mutations in schizophrenia. Nature 506:185-190.
KIF5B	kinesin family member 5B	WES	Purcell et al., (2014): A polygenic burden of rare disruptive mutations in schizophrenia. Nature 506:185-190.
KIF5C	kinesin family member 5C	WES	Purcell et al., (2014): A polygenic burden of rare disruptive mutations in schizophrenia. Nature 506:185-190.
KIF6	kinesin family member 6	WES	Fromer et al.,, (2014): De novo mutations in schizophrenia implicate synaptic networks. Nature 506(7487):179-84.
KIFC2	kinesin family member C2	WES	Purcell et al., (2014): A polygenic burden of rare disruptive mutations in schizophrenia. Nature 506:185-190.
KIFC3	kinesin family member C3	methylation	Montano et al.,, (2016): Association of DNA Methylation Differences With Schizophrenia in an Epigenome-Wide Association Study. JAMA Psychiatry 73(5):506-14.
KLC1	kinesin light chain 1	GWAS	Schizophrenia Working Group of the Psychiatric Genomics Consortium, (2014): Biological insights from 108 schizophrenia-associated genetic loci. Nature 511(7510):421-7.
KLC2	kinesin light chain 2	WES	Purcell et al., (2014): A polygenic burden of rare disruptive mutations in schizophrenia. Nature 506:185-190.
KLF12	Kruppel like factor 12	WES	Purcell et al., (2014): A polygenic burden of rare disruptive mutations in schizophrenia. Nature 506:185-190.
KLF13	Kruppel like factor 13	methylation	Montano et al.,, (2016): Association of DNA Methylation Differences With Schizophrenia in an Epigenome-Wide Association Study. JAMA Psychiatry 73(5):506-14.
KLHDC1	kelch domain containing 1	WES	Fromer et al.,, (2014): De novo mutations in schizophrenia implicate synaptic networks. Nature 506(7487):179-84.
KLHL17	kelch like family member 17	WES	Fromer et al.,, (2014): De novo mutations in schizophrenia implicate synaptic networks. Nature 506(7487):179-84.
KLHL20	kelch like family member 20	WES	Fromer et al.,, (2014): De novo mutations in schizophrenia implicate synaptic networks. Nature 506(7487):179-84.
KLHL22	kelch like family member 22	WES	Purcell et al., (2014): A polygenic burden of rare disruptive mutations in schizophrenia. Nature 506:185-190.
KLHL22	kelch like family member 22	CNV-bearing	Luo et al.,, (2014): Systematic prioritization and integrative analysis of copy number variations in schizophrenia reveal key schizophrenia susceptibility genes. Schizophr Bull 40(6):1285-99.
KMO	kynurenine 3-monooxygenase (kynurenine 3-hydroxylase)	linkage/association studies	Ng et al.,, (2009): Meta-analysis of 32 genome-wide linkage studies of schizophrenia. Mol Psychiatry 14(8):774-85.
KMT2E-AS1	KMT2E antisense RNA 1 (head to head)	GWAS	Schizophrenia Working Group of the Psychiatric Genomics Consortium, (2014): Biological insights from 108 schizophrenia-associated genetic loci. Nature 511(7510):421-7.
KNDC1	kinase non-catalytic C-lobe domain (KIND) containing 1	WES	Purcell et al., (2014): A polygenic burden of rare disruptive mutations in schizophrenia. Nature 506:185-190.
KPNA1	karyopherin subunit alpha 1	WES	Purcell et al., (2014): A polygenic burden of rare disruptive mutations in schizophrenia. Nature 506:185-190.
KPNB1	karyopherin subunit beta 1	WES	Purcell et al., (2014): A polygenic burden of rare disruptive mutations in schizophrenia. Nature 506:185-190.
KRAS	KRAS proto-oncogene, GTPase	WES	Purcell et al., (2014): A polygenic burden of rare disruptive mutations in schizophrenia. Nature 506:185-190.
KRT15	keratin 15	WES	Fromer et al.,, (2014): De novo mutations in schizophrenia implicate synaptic networks. Nature 506(7487):179-84.
KRT20	keratin 20	WES	Fromer et al.,, (2014): De novo mutations in schizophrenia implicate synaptic networks. Nature 506(7487):179-84.
KRT25	keratin 25	WES	Fromer et al.,, (2014): De novo mutations in schizophrenia implicate synaptic networks. Nature 506(7487):179-84.
KRT82	keratin 82	WES	Fromer et al.,, (2014): De novo mutations in schizophrenia implicate synaptic networks. Nature 506(7487):179-84.
KRTAP10-3	keratin associated protein 10-3	WES	Fromer et al.,, (2014): De novo mutations in schizophrenia implicate synaptic networks. Nature 506(7487):179-84.
KXD1	KxDL motif containing 1	WES	Fromer et al.,, (2014): De novo mutations in schizophrenia implicate synaptic networks. Nature 506(7487):179-84.
KY	kyphoscoliosis peptidase	linkage/association studies	Ng et al.,, (2009): Meta-analysis of 32 genome-wide linkage studies of schizophrenia. Mol Psychiatry 14(8):774-85.
L1CAM	L1 cell adhesion molecule	WES	Purcell et al., (2014): A polygenic burden of rare disruptive mutations in schizophrenia. Nature 506:185-190.
L3MBTL2	l(3)mbt-like 2 (Drosophila)	GWAS	Schizophrenia Working Group of the Psychiatric Genomics Consortium, (2014): Biological insights from 108 schizophrenia-associated genetic loci. Nature 511(7510):421-7.
LAMA1	laminin subunit alpha 1	WES	Purcell et al., (2014): A polygenic burden of rare disruptive mutations in schizophrenia. Nature 506:185-190.
LAMA2	laminin subunit alpha 2	WES	Purcell et al., (2014): A polygenic burden of rare disruptive mutations in schizophrenia. Nature 506:185-190.
LAMA4	laminin subunit alpha 4	WES	Fromer et al.,, (2014): De novo mutations in schizophrenia implicate synaptic networks. Nature 506(7487):179-84.
LANCL2	LanC like 2	WES	Purcell et al., (2014): A polygenic burden of rare disruptive mutations in schizophrenia. Nature 506:185-190.
LARGE	LARGE xylosyl- and glucuronyltransferase 1	WES	Purcell et al., (2014): A polygenic burden of rare disruptive mutations in schizophrenia. Nature 506:185-190.
LARP7	La ribonucleoprotein domain family member 7	WES	Purcell et al., (2014): A polygenic burden of rare disruptive mutations in schizophrenia. Nature 506:185-190.
LARS	leucyl-tRNA synthetase	linkage/association studies	Ng et al.,, (2009): Meta-analysis of 32 genome-wide linkage studies of schizophrenia. Mol Psychiatry 14(8):774-85.
LARS2	leucyl-tRNA synthetase 2, mitochondrial	WES	Purcell et al., (2014): A polygenic burden of rare disruptive mutations in schizophrenia. Nature 506:185-190.
LCAT	lecithin-cholesterol acyltransferase	GWAS	Schizophrenia Working Group of the Psychiatric Genomics Consortium, (2014): Biological insights from 108 schizophrenia-associated genetic loci. Nature 511(7510):421-7.
LCT	lactase	WES	Purcell et al., (2014): A polygenic burden of rare disruptive mutations in schizophrenia. Nature 506:185-190.
LDHA	lactate dehydrogenase A	WES	Purcell et al., (2014): A polygenic burden of rare disruptive mutations in schizophrenia. Nature 506:185-190.
LDHB	lactate dehydrogenase B	WES	Purcell et al., (2014): A polygenic burden of rare disruptive mutations in schizophrenia. Nature 506:185-190.
LDLRAD4	low density lipoprotein receptor class A domain containing 4	linkage/association studies	Lewis et al.,, (2003): Genome scan meta-analysis of schizophrenia and bipolar disorder, part II: Schizophrenia. Am J Hum Genet 73(1):34-48.
LENG1	leukocyte receptor cluster member 1	WES	Fromer et al.,, (2014): De novo mutations in schizophrenia implicate synaptic networks. Nature 506(7487):179-84.
LENG9	leukocyte receptor cluster member 9	methylation	Montano et al.,, (2016): Association of DNA Methylation Differences With Schizophrenia in an Epigenome-Wide Association Study. JAMA Psychiatry 73(5):506-14.
LGALS3BP	galectin 3 binding protein	WES	Fromer et al.,, (2014): De novo mutations in schizophrenia implicate synaptic networks. Nature 506(7487):179-84.
LHFPL4	lipoma HMGIC fusion partner-like 4	WES	Purcell et al., (2014): A polygenic burden of rare disruptive mutations in schizophrenia. Nature 506:185-190.
LHX6	LIM homeobox 6	WES	Fromer et al.,, (2014): De novo mutations in schizophrenia implicate synaptic networks. Nature 506(7487):179-84.
LIMD1	LIM domains containing 1	WES	Fromer et al.,, (2014): De novo mutations in schizophrenia implicate synaptic networks. Nature 506(7487):179-84.
LIN7B	lin-7 homolog B, crumbs cell polarity complex component	WES	Purcell et al., (2014): A polygenic burden of rare disruptive mutations in schizophrenia. Nature 506:185-190.
LIN7C	lin-7 homolog C, crumbs cell polarity complex component	WES	Purcell et al., (2014): A polygenic burden of rare disruptive mutations in schizophrenia. Nature 506:185-190.
LINC00271	long intergenic non-protein coding RNA 271	linkage/association studies	Allen et al., (2008): Systematic meta-analyses and field synopsis of genetic association studies in schizophrenia: the SzGene database. Nat Genet 40(7):827-34.
LINC00533	long intergenic non-protein coding RNA 533	GWAS	Schizophrenia Working Group of the Psychiatric Genomics Consortium, (2014): Biological insights from 108 schizophrenia-associated genetic loci. Nature 511(7510):421-7.
LINC00623	long intergenic non-protein coding RNA 623	methylation	Montano et al.,, (2016): Association of DNA Methylation Differences With Schizophrenia in an Epigenome-Wide Association Study. JAMA Psychiatry 73(5):506-14.
LINC00634	long intergenic non-protein coding RNA 634	GWAS	Schizophrenia Working Group of the Psychiatric Genomics Consortium, (2014): Biological insights from 108 schizophrenia-associated genetic loci. Nature 511(7510):421-7.
LINC00933	long intergenic non-protein coding RNA 933	GWAS	Schizophrenia Working Group of the Psychiatric Genomics Consortium, (2014): Biological insights from 108 schizophrenia-associated genetic loci. Nature 511(7510):421-7.
LINC01004	long intergenic non-protein coding RNA 1004	GWAS	Schizophrenia Working Group of the Psychiatric Genomics Consortium, (2014): Biological insights from 108 schizophrenia-associated genetic loci. Nature 511(7510):421-7.
LINGO1	leucine rich repeat and Ig domain containing 1	WES	Purcell et al., (2014): A polygenic burden of rare disruptive mutations in schizophrenia. Nature 506:185-190.
LINGO2	leucine rich repeat and Ig domain containing 2	WES	Fromer et al.,, (2014): De novo mutations in schizophrenia implicate synaptic networks. Nature 506(7487):179-84.
LIPK	lipase family member K	WES	Fromer et al.,, (2014): De novo mutations in schizophrenia implicate synaptic networks. Nature 506(7487):179-84.
LLGL1	LLGL1, scribble cell polarity complex component	WES	Purcell et al., (2014): A polygenic burden of rare disruptive mutations in schizophrenia. Nature 506:185-190.
LLGL2	LLGL2, scribble cell polarity complex component	WES	Fromer et al.,, (2014): De novo mutations in schizophrenia implicate synaptic networks. Nature 506(7487):179-84.
LMO7	LIM domain 7	WES	Purcell et al., (2014): A polygenic burden of rare disruptive mutations in schizophrenia. Nature 506:185-190.
LMTK2	lemur tyrosine kinase 2	WES	Purcell et al., (2014): A polygenic burden of rare disruptive mutations in schizophrenia. Nature 506:185-190.
LMTK3	lemur tyrosine kinase 3	WES	Purcell et al., (2014): A polygenic burden of rare disruptive mutations in schizophrenia. Nature 506:185-190.
LOC284454	uncharacterized LOC284454	methylation	Montano et al.,, (2016): Association of DNA Methylation Differences With Schizophrenia in an Epigenome-Wide Association Study. JAMA Psychiatry 73(5):506-14.
LOC378135	similar to KIAA0559 protein [WITHDRAWN GENBANK ENTRY]	sherlock integrative analysis (http://sherlock.ucsf.edu/)
LONP1	lon peptidase 1, mitochondrial	WES	Fromer et al.,, (2014): De novo mutations in schizophrenia implicate synaptic networks. Nature 506(7487):179-84.
LPAR3	lysophosphatidic acid receptor 3	WES	Fromer et al.,, (2014): De novo mutations in schizophrenia implicate synaptic networks. Nature 506(7487):179-84.
LPCAT1	lysophosphatidylcholine acyltransferase 1	WES	Fromer et al.,, (2014): De novo mutations in schizophrenia implicate synaptic networks. Nature 506(7487):179-84.
LPHN1	adhesion G protein-coupled receptor L1	WES	Purcell et al., (2014): A polygenic burden of rare disruptive mutations in schizophrenia. Nature 506:185-190.
LPHN2	adhesion G protein-coupled receptor L2	WES	Fromer et al.,, (2014): De novo mutations in schizophrenia implicate synaptic networks. Nature 506(7487):179-84.
LPHN3	adhesion G protein-coupled receptor L3	WES	Purcell et al., (2014): A polygenic burden of rare disruptive mutations in schizophrenia. Nature 506:185-190.
LPIN2	lipin 2	WES	Purcell et al., (2014): A polygenic burden of rare disruptive mutations in schizophrenia. Nature 506:185-190.
LPL	lipoprotein lipase	linkage/association studies	Ng et al.,, (2009): Meta-analysis of 32 genome-wide linkage studies of schizophrenia. Mol Psychiatry 14(8):774-85.
LPO	lactoperoxidase	methylation	Montano et al.,, (2016): Association of DNA Methylation Differences With Schizophrenia in an Epigenome-Wide Association Study. JAMA Psychiatry 73(5):506-14.
LRFN3	leucine rich repeat and fibronectin type III domain containing 3	methylation	Montano et al.,, (2016): Association of DNA Methylation Differences With Schizophrenia in an Epigenome-Wide Association Study. JAMA Psychiatry 73(5):506-14.
LRP1	low density lipoprotein receptor-related protein 1	GWAS	Schizophrenia Working Group of the Psychiatric Genomics Consortium, (2014): Biological insights from 108 schizophrenia-associated genetic loci. Nature 511(7510):421-7.
LRP3	LDL receptor related protein 3	WES	Purcell et al., (2014): A polygenic burden of rare disruptive mutations in schizophrenia. Nature 506:185-190.
LRP4	LDL receptor related protein 4	WES	Fromer et al.,, (2014): De novo mutations in schizophrenia implicate synaptic networks. Nature 506(7487):179-84.
LRP8	LDL receptor related protein 8	WES	Purcell et al., (2014): A polygenic burden of rare disruptive mutations in schizophrenia. Nature 506:185-190.
LRPPRC	leucine rich pentatricopeptide repeat containing	WES	Purcell et al., (2014): A polygenic burden of rare disruptive mutations in schizophrenia. Nature 506:185-190.
LRRC41	leucine rich repeat containing 41	WES	Purcell et al., (2014): A polygenic burden of rare disruptive mutations in schizophrenia. Nature 506:185-190.
LRRC47	leucine rich repeat containing 47	WES	Purcell et al., (2014): A polygenic burden of rare disruptive mutations in schizophrenia. Nature 506:185-190.
LRRC48	leucine rich repeat containing 48	GWAS	Schizophrenia Working Group of the Psychiatric Genomics Consortium, (2014): Biological insights from 108 schizophrenia-associated genetic loci. Nature 511(7510):421-7.
LRRC4B	leucine rich repeat containing 4B	WES	Purcell et al., (2014): A polygenic burden of rare disruptive mutations in schizophrenia. Nature 506:185-190.
LRRC7	leucine rich repeat containing 7	WES	Purcell et al., (2014): A polygenic burden of rare disruptive mutations in schizophrenia. Nature 506:185-190.
LRRC8B	leucine rich repeat containing 8 family member B	WES	Purcell et al., (2014): A polygenic burden of rare disruptive mutations in schizophrenia. Nature 506:185-190.
LRRIQ3	leucine-rich repeats and IQ motif containing 3	GWAS	Schizophrenia Working Group of the Psychiatric Genomics Consortium, (2014): Biological insights from 108 schizophrenia-associated genetic loci. Nature 511(7510):421-7.
LRRN2	leucine rich repeat neuronal 2	WES	Purcell et al., (2014): A polygenic burden of rare disruptive mutations in schizophrenia. Nature 506:185-190.
LSAMP	limbic system-associated membrane protein	sherlock integrative analysis (http://sherlock.ucsf.edu/)
LSM1	LSM1, U6 small nuclear RNA associated	GWAS	Schizophrenia Working Group of the Psychiatric Genomics Consortium, (2014): Biological insights from 108 schizophrenia-associated genetic loci. Nature 511(7510):421-7.
LSM3	LSM3 homolog, U6 small nuclear RNA and mRNA degradation associated	WES	Fromer et al.,, (2014): De novo mutations in schizophrenia implicate synaptic networks. Nature 506(7487):179-84.
LTA	lymphotoxin alpha	linkage/association studies	Lewis et al.,, (2003): Genome scan meta-analysis of schizophrenia and bipolar disorder, part II: Schizophrenia. Am J Hum Genet 73(1):34-48.
LUZP1	leucine zipper protein 1	WES	Fromer et al.,, (2014): De novo mutations in schizophrenia implicate synaptic networks. Nature 506(7487):179-84.
LUZP2	leucine zipper protein 2	GWAS	Schizophrenia Working Group of the Psychiatric Genomics Consortium, (2014): Biological insights from 108 schizophrenia-associated genetic loci. Nature 511(7510):421-7.
LYN	LYN proto-oncogene, Src family tyrosine kinase	WES	Purcell et al., (2014): A polygenic burden of rare disruptive mutations in schizophrenia. Nature 506:185-190.
LYNX1	Ly6/neurotoxin 1	WES	Purcell et al., (2014): A polygenic burden of rare disruptive mutations in schizophrenia. Nature 506:185-190.
LZTR1	leucine-zipper-like transcription regulator 1	WES	Fromer et al.,, (2014): De novo mutations in schizophrenia implicate synaptic networks. Nature 506(7487):179-84.
LZTS1	leucine zipper, putative tumor suppressor 1	linkage/association studies	Ng et al.,, (2009): Meta-analysis of 32 genome-wide linkage studies of schizophrenia. Mol Psychiatry 14(8):774-85.
MACF1	microtubule-actin crosslinking factor 1	WES	Purcell et al., (2014): A polygenic burden of rare disruptive mutations in schizophrenia. Nature 506:185-190.
MAD1L1	MAD1 mitotic arrest deficient-like 1 (yeast)	GWAS	Ripke et al.,, (2013): Genome-wide association analysis identifies 13 new risk loci for schizophrenia. Nat Genet 45(10):1150-9.
MADD	MAP kinase activating death domain	WES	Purcell et al., (2014): A polygenic burden of rare disruptive mutations in schizophrenia. Nature 506:185-190.
MAFB	MAF bZIP transcription factor B	WES	Fromer et al.,, (2014): De novo mutations in schizophrenia implicate synaptic networks. Nature 506(7487):179-84.
MAGEC1	MAGE family member C1	WES	Purcell et al., (2014): A polygenic burden of rare disruptive mutations in schizophrenia. Nature 506:185-190.
MAGED1	MAGE family member D1	WES	Purcell et al., (2014): A polygenic burden of rare disruptive mutations in schizophrenia. Nature 506:185-190.
MAGI1	membrane associated guanylate kinase, WW and PDZ domain containing 1	linkage/association studies	Lewis et al.,, (2003): Genome scan meta-analysis of schizophrenia and bipolar disorder, part II: Schizophrenia. Am J Hum Genet 73(1):34-48.
MAGI2	membrane associated guanylate kinase, WW and PDZ domain containing 2	linkage/association studies	Lewis et al.,, (2003): Genome scan meta-analysis of schizophrenia and bipolar disorder, part II: Schizophrenia. Am J Hum Genet 73(1):34-48.
MAGI3	membrane associated guanylate kinase, WW and PDZ domain containing 3	linkage/association studies	Lewis et al.,, (2003): Genome scan meta-analysis of schizophrenia and bipolar disorder, part II: Schizophrenia. Am J Hum Genet 73(1):34-48.
MAGT1	magnesium transporter 1	WES	Fromer et al.,, (2014): De novo mutations in schizophrenia implicate synaptic networks. Nature 506(7487):179-84.
MALL	mal, T-cell differentiation protein-like	linkage/association studies	Ng et al.,, (2009): Meta-analysis of 32 genome-wide linkage studies of schizophrenia. Mol Psychiatry 14(8):774-85.
MAMDC4	MAM domain containing 4	WES	Fromer et al.,, (2014): De novo mutations in schizophrenia implicate synaptic networks. Nature 506(7487):179-84.
MAML2	mastermind like transcriptional coactivator 2	WES	Fromer et al.,, (2014): De novo mutations in schizophrenia implicate synaptic networks. Nature 506(7487):179-84.
MAN1A1	mannosidase alpha class 1A member 1	methylation	Montano et al.,, (2016): Association of DNA Methylation Differences With Schizophrenia in an Epigenome-Wide Association Study. JAMA Psychiatry 73(5):506-14.
MAN2A1	mannosidase, alpha, class 2A, member 1	GWAS	Schizophrenia Working Group of the Psychiatric Genomics Consortium, (2014): Biological insights from 108 schizophrenia-associated genetic loci. Nature 511(7510):421-7.
MAN2A2	mannosidase, alpha, class 2A, member 2	GWAS	Schizophrenia Working Group of the Psychiatric Genomics Consortium, (2014): Biological insights from 108 schizophrenia-associated genetic loci. Nature 511(7510):421-7.
MAN2B1	mannosidase alpha class 2B member 1	methylation	Montano et al.,, (2016): Association of DNA Methylation Differences With Schizophrenia in an Epigenome-Wide Association Study. JAMA Psychiatry 73(5):506-14.
MAOA	monoamine oxidase A	linkage/association studies	Ng et al.,, (2009): Meta-analysis of 32 genome-wide linkage studies of schizophrenia. Mol Psychiatry 14(8):774-85.
MAOB	monoamine oxidase B	WES	Purcell et al., (2014): A polygenic burden of rare disruptive mutations in schizophrenia. Nature 506:185-190.
MAP1A	microtubule associated protein 1A	WES	Purcell et al., (2014): A polygenic burden of rare disruptive mutations in schizophrenia. Nature 506:185-190.
MAP1B	microtubule associated protein 1B	WES	Purcell et al., (2014): A polygenic burden of rare disruptive mutations in schizophrenia. Nature 506:185-190.
MAP1LC3A	microtubule associated protein 1 light chain 3 alpha	WES	Purcell et al., (2014): A polygenic burden of rare disruptive mutations in schizophrenia. Nature 506:185-190.
MAP2	microtubule-associated protein 2	linkage/association studies	Ng et al.,, (2009): Meta-analysis of 32 genome-wide linkage studies of schizophrenia. Mol Psychiatry 14(8):774-85.
MAP2K1	mitogen-activated protein kinase kinase 1	WES	Purcell et al., (2014): A polygenic burden of rare disruptive mutations in schizophrenia. Nature 506:185-190.
MAP3K1	mitogen-activated protein kinase kinase kinase 1	methylation	Aberg KA et al., (2014): Methylome-wide association study of schizophrenia: identifying blood biomarker signatures of environmental insults. JAMA Psychiatry 71(3):255-264.
MAP3K12	mitogen-activated protein kinase kinase kinase 12	WES	Purcell et al., (2014): A polygenic burden of rare disruptive mutations in schizophrenia. Nature 506:185-190.
MAP4	microtubule associated protein 4	WES	Purcell et al., (2014): A polygenic burden of rare disruptive mutations in schizophrenia. Nature 506:185-190.
MAP4K4	mitogen-activated protein kinase kinase kinase kinase 4	WES	Purcell et al., (2014): A polygenic burden of rare disruptive mutations in schizophrenia. Nature 506:185-190.
MAP6	microtubule associated protein 6	WES	Purcell et al., (2014): A polygenic burden of rare disruptive mutations in schizophrenia. Nature 506:185-190.
MAP6D1	MAP6 domain containing 1	WES	Purcell et al., (2014): A polygenic burden of rare disruptive mutations in schizophrenia. Nature 506:185-190.
MAP7D1	MAP7 domain containing 1	WES	Purcell et al., (2014): A polygenic burden of rare disruptive mutations in schizophrenia. Nature 506:185-190.
MAPK1	mitogen-activated protein kinase 1	WES	Purcell et al., (2014): A polygenic burden of rare disruptive mutations in schizophrenia. Nature 506:185-190.
MAPK3	mitogen-activated protein kinase 3	GWAS	Schizophrenia Working Group of the Psychiatric Genomics Consortium, (2014): Biological insights from 108 schizophrenia-associated genetic loci. Nature 511(7510):421-7.
MAPK4	mitogen-activated protein kinase 4	WES	Purcell et al., (2014): A polygenic burden of rare disruptive mutations in schizophrenia. Nature 506:185-190.
MAPK8	mitogen-activated protein kinase 8	WES	Fromer et al.,, (2014): De novo mutations in schizophrenia implicate synaptic networks. Nature 506(7487):179-84.
MAPK8IP1	mitogen-activated protein kinase 8 interacting protein 1	WES	Purcell et al., (2014): A polygenic burden of rare disruptive mutations in schizophrenia. Nature 506:185-190.
MAPK8IP3	mitogen-activated protein kinase 8 interacting protein 3	WES	Purcell et al., (2014): A polygenic burden of rare disruptive mutations in schizophrenia. Nature 506:185-190.
MAPKAP1	mitogen-activated protein kinase associated protein 1	methylation	Montano et al.,, (2016): Association of DNA Methylation Differences With Schizophrenia in an Epigenome-Wide Association Study. JAMA Psychiatry 73(5):506-14.
MAPKBP1	mitogen-activated protein kinase binding protein 1	WES	Purcell et al., (2014): A polygenic burden of rare disruptive mutations in schizophrenia. Nature 506:185-190.
MAPRE2	microtubule associated protein RP/EB family member 2	WES	Purcell et al., (2014): A polygenic burden of rare disruptive mutations in schizophrenia. Nature 506:185-190.
MAPRE3	microtubule associated protein RP/EB family member 3	WES	Purcell et al., (2014): A polygenic burden of rare disruptive mutations in schizophrenia. Nature 506:185-190.
MAPT	microtubule associated protein tau	WES	Purcell et al., (2014): A polygenic burden of rare disruptive mutations in schizophrenia. Nature 506:185-190.
MARCH11	membrane associated ring-CH-type finger 11	methylation	Montano et al.,, (2016): Association of DNA Methylation Differences With Schizophrenia in an Epigenome-Wide Association Study. JAMA Psychiatry 73(5):506-14.
MARCO	macrophage receptor with collagenous structure	linkage/association studies	Lewis et al.,, (2003): Genome scan meta-analysis of schizophrenia and bipolar disorder, part II: Schizophrenia. Am J Hum Genet 73(1):34-48.
MARK2	microtubule affinity regulating kinase 2	WES	Purcell et al., (2014): A polygenic burden of rare disruptive mutations in schizophrenia. Nature 506:185-190.
MARK4	microtubule affinity regulating kinase 4	methylation	Aberg KA et al., (2014): Methylome-wide association study of schizophrenia: identifying blood biomarker signatures of environmental insults. JAMA Psychiatry 71(3):255-264.
MARS2	methionyl-tRNA synthetase 2, mitochondrial	GWAS	Schizophrenia Working Group of the Psychiatric Genomics Consortium, (2014): Biological insights from 108 schizophrenia-associated genetic loci. Nature 511(7510):421-7.
MASP2	mannan binding lectin serine peptidase 2	WES	Fromer et al.,, (2014): De novo mutations in schizophrenia implicate synaptic networks. Nature 506(7487):179-84.
MAST1	microtubule associated serine/threonine kinase 1	WES	Fromer et al.,, (2014): De novo mutations in schizophrenia implicate synaptic networks. Nature 506(7487):179-84.
MAST2	microtubule associated serine/threonine kinase 2	WES	Purcell et al., (2014): A polygenic burden of rare disruptive mutations in schizophrenia. Nature 506:185-190.
MAST4	microtubule associated serine/threonine kinase family member 4	WES	Fromer et al.,, (2014): De novo mutations in schizophrenia implicate synaptic networks. Nature 506(7487):179-84.
MAU2	MAU2 sister chromatid cohesion factor	GWAS	Ripke et al.,, (2013): Genome-wide association analysis identifies 13 new risk loci for schizophrenia. Nat Genet 45(10):1150-9.
MAZ	MYC associated zinc finger protein	WES	Purcell et al., (2014): A polygenic burden of rare disruptive mutations in schizophrenia. Nature 506:185-190.
MBD5	methyl-CpG binding domain protein 5	WES	Purcell et al., (2014): A polygenic burden of rare disruptive mutations in schizophrenia. Nature 506:185-190.
MBD6	methyl-CpG binding domain protein 6	methylation	Montano et al.,, (2016): Association of DNA Methylation Differences With Schizophrenia in an Epigenome-Wide Association Study. JAMA Psychiatry 73(5):506-14.
MBP	myelin basic protein	functional genomics	Ayalew M et al., (2012): Convergent functional genomics of schizophrenia: from comprehensive understanding to genetic risk prediction. Mol Psychiatry 17(9):887-905.
MBTPS1	membrane bound transcription factor peptidase, site 1	WES	Purcell et al., (2014): A polygenic burden of rare disruptive mutations in schizophrenia. Nature 506:185-190.
MCHR1	melanin-concentrating hormone receptor 1	linkage/association studies	Lewis et al.,, (2003): Genome scan meta-analysis of schizophrenia and bipolar disorder, part II: Schizophrenia. Am J Hum Genet 73(1):34-48.
MCM3	minichromosome maintenance complex component 3	methylation	Montano et al.,, (2016): Association of DNA Methylation Differences With Schizophrenia in an Epigenome-Wide Association Study. JAMA Psychiatry 73(5):506-14.
MDGA1	MAM domain containing glycosylphosphatidylinositol anchor 1	linkage/association studies	Allen et al., (2008): Systematic meta-analyses and field synopsis of genetic association studies in schizophrenia: the SzGene database. Nat Genet 40(7):827-34.
MDH1	malate dehydrogenase 1	WES	Purcell et al., (2014): A polygenic burden of rare disruptive mutations in schizophrenia. Nature 506:185-190.
MDH2	malate dehydrogenase 2	WES	Purcell et al., (2014): A polygenic burden of rare disruptive mutations in schizophrenia. Nature 506:185-190.
MDK	midkine (neurite growth-promoting factor 2)	GWAS	Schizophrenia Working Group of the Psychiatric Genomics Consortium, (2014): Biological insights from 108 schizophrenia-associated genetic loci. Nature 511(7510):421-7.
MDM1	Mdm1 nuclear protein	WES	Fromer et al.,, (2014): De novo mutations in schizophrenia implicate synaptic networks. Nature 506(7487):179-84.
MED12	mediator complex subunit 12	linkage/association studies	Lewis et al.,, (2003): Genome scan meta-analysis of schizophrenia and bipolar disorder, part II: Schizophrenia. Am J Hum Genet 73(1):34-48.
MED13	mediator complex subunit 13	WES	Purcell et al., (2014): A polygenic burden of rare disruptive mutations in schizophrenia. Nature 506:185-190.
MED13L	mediator complex subunit 13 like	WES	Purcell et al., (2014): A polygenic burden of rare disruptive mutations in schizophrenia. Nature 506:185-190.
MED14	mediator complex subunit 14	WES	Purcell et al., (2014): A polygenic burden of rare disruptive mutations in schizophrenia. Nature 506:185-190.
MED16	mediator complex subunit 16	WES	Purcell et al., (2014): A polygenic burden of rare disruptive mutations in schizophrenia. Nature 506:185-190.
MED19	mediator complex subunit 19	GWAS	Schizophrenia Working Group of the Psychiatric Genomics Consortium, (2014): Biological insights from 108 schizophrenia-associated genetic loci. Nature 511(7510):421-7.
MED29	mediator complex subunit 29	WES	Fromer et al.,, (2014): De novo mutations in schizophrenia implicate synaptic networks. Nature 506(7487):179-84.
MED7	mediator complex subunit 7	linkage/association studies	Ng et al.,, (2009): Meta-analysis of 32 genome-wide linkage studies of schizophrenia. Mol Psychiatry 14(8):774-85.
MEF2C	myocyte enhancer factor 2C	GWAS	Schizophrenia Working Group of the Psychiatric Genomics Consortium, (2014): Biological insights from 108 schizophrenia-associated genetic loci. Nature 511(7510):421-7.
MEF2C-AS1	MEF2C antisense RNA 1	GWAS	Schizophrenia Working Group of the Psychiatric Genomics Consortium, (2014): Biological insights from 108 schizophrenia-associated genetic loci. Nature 511(7510):421-7.
MEF2D	myocyte enhancer factor 2D	WES	Purcell et al., (2014): A polygenic burden of rare disruptive mutations in schizophrenia. Nature 506:185-190.
MEGF10	multiple EGF-like-domains 10	linkage/association studies	Lewis et al.,, (2003): Genome scan meta-analysis of schizophrenia and bipolar disorder, part II: Schizophrenia. Am J Hum Genet 73(1):34-48.
METTL14	methyltransferase like 14	WES	Fromer et al.,, (2014): De novo mutations in schizophrenia implicate synaptic networks. Nature 506(7487):179-84.
MFHAS1	malignant fibrous histiocytoma amplified sequence 1	WES	Purcell et al., (2014): A polygenic burden of rare disruptive mutations in schizophrenia. Nature 506:185-190.
MGAT5B	mannosyl (alpha-1,6-)-glycoprotein beta-1,6-N-acetyl-glucosaminyltransferase, isozyme B	WES	Purcell et al., (2014): A polygenic burden of rare disruptive mutations in schizophrenia. Nature 506:185-190.
MGME1	mitochondrial genome maintenance exonuclease 1	WES	Fromer et al.,, (2014): De novo mutations in schizophrenia implicate synaptic networks. Nature 506(7487):179-84.
MGRN1	mahogunin ring finger 1	methylation	Montano et al.,, (2016): Association of DNA Methylation Differences With Schizophrenia in an Epigenome-Wide Association Study. JAMA Psychiatry 73(5):506-14.
MHC region	-	GWAS	International Schizophrenia Consortium et al.,, (2009): Common polygenic variation contributes to risk of schizophrenia and bipolar disorder. Nature 460(7256):748-52.
MIB1	mindbomb E3 ubiquitin protein ligase 1	WES	Purcell et al., (2014): A polygenic burden of rare disruptive mutations in schizophrenia. Nature 506:185-190.
MICAL2	microtubule associated monooxygenase, calponin and LIM domain containing 2	WES	Purcell et al., (2014): A polygenic burden of rare disruptive mutations in schizophrenia. Nature 506:185-190.
MICB	MHC class I polypeptide-related sequence B	linkage/association studies	Lewis et al.,, (2003): Genome scan meta-analysis of schizophrenia and bipolar disorder, part II: Schizophrenia. Am J Hum Genet 73(1):34-48.
MIF	macrophage migration inhibitory factor (glycosylation-inhibiting factor)	WES	Fromer et al.,, (2014): De novo mutations in schizophrenia implicate synaptic networks. Nature 506(7487):179-84.
MINK1	misshapen like kinase 1	WES	Purcell et al., (2014): A polygenic burden of rare disruptive mutations in schizophrenia. Nature 506:185-190.
MIR101-1	microRNA 101-1	methylation	Montano et al.,, (2016): Association of DNA Methylation Differences With Schizophrenia in an Epigenome-Wide Association Study. JAMA Psychiatry 73(5):506-14.
MIR1228	microRNA 1228	GWAS	Schizophrenia Working Group of the Psychiatric Genomics Consortium, (2014): Biological insights from 108 schizophrenia-associated genetic loci. Nature 511(7510):421-7.
MIR1281	microRNA 1281	GWAS	Schizophrenia Working Group of the Psychiatric Genomics Consortium, (2014): Biological insights from 108 schizophrenia-associated genetic loci. Nature 511(7510):421-7.
MIR130A	microRNA 130a	GWAS	Schizophrenia Working Group of the Psychiatric Genomics Consortium, (2014): Biological insights from 108 schizophrenia-associated genetic loci. Nature 511(7510):421-7.
MIR137	microRNA 137	GWAS	Schizophrenia Psychiatric Genome-Wide Association Study (GWAS) Consortium, (2011): Genome-wide association study identifies five new schizophrenia loci. Nat Genet 43(10):969-76.
MIR137HG	MIR137 host gene	GWAS	Schizophrenia Working Group of the Psychiatric Genomics Consortium, (2014): Biological insights from 108 schizophrenia-associated genetic loci. Nature 511(7510):421-7.
MIR143HG- CARMN	cardiac mesoderm enhancer-associated non-coding RNA	methylation	Montano et al.,, (2016): Association of DNA Methylation Differences With Schizophrenia in an Epigenome-Wide Association Study. JAMA Psychiatry 73(5):506-14.
MIR1538	microRNA 1538	methylation	Aberg KA et al., (2014): Methylome-wide association study of schizophrenia: identifying blood biomarker signatures of environmental insults. JAMA Psychiatry 71(3):255-264.
MIR33A	microRNA 33a	GWAS	Schizophrenia Working Group of the Psychiatric Genomics Consortium, (2014): Biological insights from 108 schizophrenia-associated genetic loci. Nature 511(7510):421-7.
MIR378I	microRNA 378i	GWAS	Schizophrenia Working Group of the Psychiatric Genomics Consortium, (2014): Biological insights from 108 schizophrenia-associated genetic loci. Nature 511(7510):421-7.
MIR4304	microRNA 4304	GWAS	Schizophrenia Working Group of the Psychiatric Genomics Consortium, (2014): Biological insights from 108 schizophrenia-associated genetic loci. Nature 511(7510):421-7.
MIR4529	microRNA 4529	GWAS	Schizophrenia Working Group of the Psychiatric Genomics Consortium, (2014): Biological insights from 108 schizophrenia-associated genetic loci. Nature 511(7510):421-7.
MIR4677	microRNA 4677	GWAS	Schizophrenia Working Group of the Psychiatric Genomics Consortium, (2014): Biological insights from 108 schizophrenia-associated genetic loci. Nature 511(7510):421-7.
MIR548AJ2	microRNA 548aj-2	GWAS	Schizophrenia Working Group of the Psychiatric Genomics Consortium, (2014): Biological insights from 108 schizophrenia-associated genetic loci. Nature 511(7510):421-7.
MIR640	microRNA 640	GWAS	Schizophrenia Working Group of the Psychiatric Genomics Consortium, (2014): Biological insights from 108 schizophrenia-associated genetic loci. Nature 511(7510):421-7.
MKI67	marker of proliferation Ki-67	WES	Fromer et al.,, (2014): De novo mutations in schizophrenia implicate synaptic networks. Nature 506(7487):179-84.
MKL1	megakaryoblastic leukemia (translocation) 1	GWAS	Luo et al.,, (2014): Systematic prioritization and integrative analysis of copy number variations in schizophrenia reveal key schizophrenia susceptibility genes. Schizophr Bull 40(6):1285-99.
MKL2	MKL1/myocardin like 2	WES	Purcell et al., (2014): A polygenic burden of rare disruptive mutations in schizophrenia. Nature 506:185-190.
MLC1	megalencephalic leukoencephalopathy with subcortical cysts 1	linkage/association studies	Lewis et al.,, (2003): Genome scan meta-analysis of schizophrenia and bipolar disorder, part II: Schizophrenia. Am J Hum Genet 73(1):34-48.
MLL2	lysine methyltransferase 2D	WES	Purcell et al., (2014): A polygenic burden of rare disruptive mutations in schizophrenia. Nature 506:185-190.
MLL3	lysine methyltransferase 2C	WES	Fromer et al.,, (2014): De novo mutations in schizophrenia implicate synaptic networks. Nature 506(7487):179-84.
MLL3- KMT2C	lysine methyltransferase 2C	methylation	Montano et al.,, (2016): Association of DNA Methylation Differences With Schizophrenia in an Epigenome-Wide Association Study. JAMA Psychiatry 73(5):506-14.
MLL5	lysine (K)-specific methyltransferase 2E	GWAS	Schizophrenia Working Group of the Psychiatric Genomics Consortium, (2014): Biological insights from 108 schizophrenia-associated genetic loci. Nature 511(7510):421-7.
MLLT4	myeloid/lymphoid or mixed-lineage leukemia; translocated to, 4	WES	Purcell et al., (2014): A polygenic burden of rare disruptive mutations in schizophrenia. Nature 506:185-190.
MLST8	MTOR associated protein, LST8 homolog	methylation	Montano et al.,, (2016): Association of DNA Methylation Differences With Schizophrenia in an Epigenome-Wide Association Study. JAMA Psychiatry 73(5):506-14.
MLXIP	MLX interacting protein	methylation	Montano et al.,, (2016): Association of DNA Methylation Differences With Schizophrenia in an Epigenome-Wide Association Study. JAMA Psychiatry 73(5):506-14.
MMP16	matrix metallopeptidase 16 (membrane-inserted)	GWAS	Schizophrenia Psychiatric Genome-Wide Association Study (GWAS) Consortium, (2011): Genome-wide association study identifies five new schizophrenia loci. Nat Genet 43(10):969-76.
MMP24	matrix metallopeptidase 24	WES	Purcell et al., (2014): A polygenic burden of rare disruptive mutations in schizophrenia. Nature 506:185-190.
MNDA	myeloid cell nuclear differentiation antigen	linkage/association studies	Ng et al.,, (2009): Meta-analysis of 32 genome-wide linkage studies of schizophrenia. Mol Psychiatry 14(8):774-85.
MOBP	myelin-associated oligodendrocyte basic protein	functional genomics	Ayalew M et al., (2012): Convergent functional genomics of schizophrenia: from comprehensive understanding to genetic risk prediction. Mol Psychiatry 17(9):887-905.
MOG	myelin oligodendrocyte glycoprotein	WES	Purcell et al., (2014): A polygenic burden of rare disruptive mutations in schizophrenia. Nature 506:185-190.
MON2	MON2 homolog, regulator of endosome-to-Golgi trafficking	WES	Purcell et al., (2014): A polygenic burden of rare disruptive mutations in schizophrenia. Nature 506:185-190.
MOV10	Mov10 RISC complex RNA helicase	WES	Fromer et al.,, (2014): De novo mutations in schizophrenia implicate synaptic networks. Nature 506(7487):179-84.
MPG	N-methylpurine DNA glycosylase	WES	Fromer et al.,, (2014): De novo mutations in schizophrenia implicate synaptic networks. Nature 506(7487):179-84.
MPHOSPH9	M-phase phosphoprotein 9	GWAS	Schizophrenia Working Group of the Psychiatric Genomics Consortium, (2014): Biological insights from 108 schizophrenia-associated genetic loci. Nature 511(7510):421-7.
MPP2	membrane palmitoylated protein 2	WES	Purcell et al., (2014): A polygenic burden of rare disruptive mutations in schizophrenia. Nature 506:185-190.
MPP6	membrane protein, palmitoylated 6 (MAGUK p55 subfamily member 6)	GWAS	Schizophrenia Working Group of the Psychiatric Genomics Consortium, (2014): Biological insights from 108 schizophrenia-associated genetic loci. Nature 511(7510):421-7.
MPRIP	myosin phosphatase Rho interacting protein	WES	Purcell et al., (2014): A polygenic burden of rare disruptive mutations in schizophrenia. Nature 506:185-190.
MPV17L2	MPV17 mitochondrial inner membrane protein like 2	sherlock integrative analysis (http://sherlock.ucsf.edu/)
MRC2	mannose receptor C type 2	WES	Fromer et al.,, (2014): De novo mutations in schizophrenia implicate synaptic networks. Nature 506(7487):179-84.
MRPL19	mitochondrial ribosomal protein L19	methylation	Aberg KA et al., (2014): Methylome-wide association study of schizophrenia: identifying blood biomarker signatures of environmental insults. JAMA Psychiatry 71(3):255-264.
MRPL27	mitochondrial ribosomal protein L27	WES	Fromer et al.,, (2014): De novo mutations in schizophrenia implicate synaptic networks. Nature 506(7487):179-84.
MSANTD2	Myb/SANT-like DNA-binding domain containing 2	GWAS	Schizophrenia Working Group of the Psychiatric Genomics Consortium, (2014): Biological insights from 108 schizophrenia-associated genetic loci. Nature 511(7510):421-7.
MSL2	male-specific lethal 2 homolog (Drosophila)	GWAS	Schizophrenia Working Group of the Psychiatric Genomics Consortium, (2014): Biological insights from 108 schizophrenia-associated genetic loci. Nature 511(7510):421-7.
MSN	moesin	WES	Purcell et al., (2014): A polygenic burden of rare disruptive mutations in schizophrenia. Nature 506:185-190.
MSX1	msh homeobox 1	functional study/methylation	Ruzicka, (2015): Circuit- and Diagnosis-Specific DNA Methylation Changes at ?-Aminobutyric Acid-Related Genes in Postmortem Human Hippocampus in Schizophrenia and Bipolar Disorder. JAMA Psychiatry 72(6):541-51.
MTCH2	mitochondrial carrier 2	WES	Purcell et al., (2014): A polygenic burden of rare disruptive mutations in schizophrenia. Nature 506:185-190.
MTHFD1L	methylenetetrahydrofolate dehydrogenase	methylation	Aberg KA et al., (2014): Methylome-wide association study of schizophrenia: identifying blood biomarker signatures of environmental insults. JAMA Psychiatry 71(3):255-264.
MTHFR	methylenetetrahydrofolate reductase (NAD(P)H)	linkage/association studies	Allen et al., (2008): Systematic meta-analyses and field synopsis of genetic association studies in schizophrenia: the SzGene database. Nat Genet 40(7):827-34.
MTMR4	myotubularin related protein 4	WES	Purcell et al., (2014): A polygenic burden of rare disruptive mutations in schizophrenia. Nature 506:185-190.
MTOR	mechanistic target of rapamycin	WES	Purcell et al., (2014): A polygenic burden of rare disruptive mutations in schizophrenia. Nature 506:185-190.
MTSS1L	metastasis suppressor 1-like	WES	Purcell et al., (2014): A polygenic burden of rare disruptive mutations in schizophrenia. Nature 506:185-190.
MUC17	mucin 17, cell surface associated	WES	Fromer et al.,, (2014): De novo mutations in schizophrenia implicate synaptic networks. Nature 506(7487):179-84.
MUC5B	mucin 5B, oligomeric mucus/gel-forming	WES	Fromer et al.,, (2014): De novo mutations in schizophrenia implicate synaptic networks. Nature 506(7487):179-84.
MUC6	mucin 6, oligomeric mucus/gel-forming	WES	Fromer et al.,, (2014): De novo mutations in schizophrenia implicate synaptic networks. Nature 506(7487):179-84.
MUM1L1	MUM1 like 1	WES	Fromer et al.,, (2014): De novo mutations in schizophrenia implicate synaptic networks. Nature 506(7487):179-84.
MUSTN1	musculoskeletal, embryonic nuclear protein 1	GWAS	Schizophrenia Working Group of the Psychiatric Genomics Consortium, (2014): Biological insights from 108 schizophrenia-associated genetic loci. Nature 511(7510):421-7.
MYADML2	myeloid-associated differentiation marker-like 2	WES	Fromer et al.,, (2014): De novo mutations in schizophrenia implicate synaptic networks. Nature 506(7487):179-84.
MYBPHL	myosin binding protein H-like	WES	Fromer et al.,, (2014): De novo mutations in schizophrenia implicate synaptic networks. Nature 506(7487):179-84.
MYCBP2	MYC binding protein 2, E3 ubiquitin protein ligase	WES	Purcell et al., (2014): A polygenic burden of rare disruptive mutations in schizophrenia. Nature 506:185-190.
MYH10	myosin, heavy chain 10, non-muscle	WES	Purcell et al., (2014): A polygenic burden of rare disruptive mutations in schizophrenia. Nature 506:185-190.
MYH11	myosin, heavy chain 11, smooth muscle	WES	Fromer et al.,, (2014): De novo mutations in schizophrenia implicate synaptic networks. Nature 506(7487):179-84.
MYH11	myosin heavy chain 11	CNV-bearing	Luo et al.,, (2014): Systematic prioritization and integrative analysis of copy number variations in schizophrenia reveal key schizophrenia susceptibility genes. Schizophr Bull 40(6):1285-99.
MYH14	myosin, heavy chain 14, non-muscle	WES	Purcell et al., (2014): A polygenic burden of rare disruptive mutations in schizophrenia. Nature 506:185-190.
MYH7B	myosin, heavy chain 7B, cardiac muscle, beta	WES	Fromer et al.,, (2014): De novo mutations in schizophrenia implicate synaptic networks. Nature 506(7487):179-84.
MYH9	myosin, heavy chain 9, non-muscle	WES	Fromer et al.,, (2014): De novo mutations in schizophrenia implicate synaptic networks. Nature 506(7487):179-84.
MYL6	myosin light chain 6	WES	Purcell et al., (2014): A polygenic burden of rare disruptive mutations in schizophrenia. Nature 506:185-190.
MYL6B	myosin light chain 6B	WES	Purcell et al., (2014): A polygenic burden of rare disruptive mutations in schizophrenia. Nature 506:185-190.
MYO10	myosin X	WES	Purcell et al., (2014): A polygenic burden of rare disruptive mutations in schizophrenia. Nature 506:185-190.
MYO15A	myosin XVA	GWAS	Schizophrenia Working Group of the Psychiatric Genomics Consortium, (2014): Biological insights from 108 schizophrenia-associated genetic loci. Nature 511(7510):421-7.
MYO16	myosin XVI	WES	Purcell et al., (2014): A polygenic burden of rare disruptive mutations in schizophrenia. Nature 506:185-190.
MYO18A	myosin XVIIIA	WES	Fromer et al.,, (2014): De novo mutations in schizophrenia implicate synaptic networks. Nature 506(7487):179-84.
MYO18B	myosin XVIIIB	GWAS	International Schizophrenia Consortium et al.,, (2009): Common polygenic variation contributes to risk of schizophrenia and bipolar disorder. Nature 460(7256):748-52.
MYO1A	myosin IA	GWAS	Schizophrenia Working Group of the Psychiatric Genomics Consortium, (2014): Biological insights from 108 schizophrenia-associated genetic loci. Nature 511(7510):421-7.
MYO1D	myosin ID	WES	Purcell et al., (2014): A polygenic burden of rare disruptive mutations in schizophrenia. Nature 506:185-190.
MYO5A	myosin VA	WES	Purcell et al., (2014): A polygenic burden of rare disruptive mutations in schizophrenia. Nature 506:185-190.
MYO6	myosin VI	WES	Purcell et al., (2014): A polygenic burden of rare disruptive mutations in schizophrenia. Nature 506:185-190.
MYOF	myoferlin	WES	Fromer et al.,, (2014): De novo mutations in schizophrenia implicate synaptic networks. Nature 506(7487):179-84.
MYOZ2	myozenin 2	WES	Fromer et al.,, (2014): De novo mutations in schizophrenia implicate synaptic networks. Nature 506(7487):179-84.
MYT1L	myelin transcription factor 1 like	methylation	Aberg KA et al., (2014): Methylome-wide association study of schizophrenia: identifying blood biomarker signatures of environmental insults. JAMA Psychiatry 71(3):255-264.
NAALADL2	N-acetylated alpha-linked acidic dipeptidase like 2	methylation	Montano et al.,, (2016): Association of DNA Methylation Differences With Schizophrenia in an Epigenome-Wide Association Study. JAMA Psychiatry 73(5):506-14.
NAB2	NGFI-A binding protein 2 (EGR1 binding protein 2)	GWAS	Schizophrenia Working Group of the Psychiatric Genomics Consortium, (2014): Biological insights from 108 schizophrenia-associated genetic loci. Nature 511(7510):421-7.
NACAD	NAC alpha domain containing	WES	Purcell et al., (2014): A polygenic burden of rare disruptive mutations in schizophrenia. Nature 506:185-190.
NAGA	N-acetylgalactosaminidase, alpha-	GWAS	Schizophrenia Working Group of the Psychiatric Genomics Consortium, (2014): Biological insights from 108 schizophrenia-associated genetic loci. Nature 511(7510):421-7.
NALCN	sodium leak channel, non-selective	WES	Fromer et al.,, (2014): De novo mutations in schizophrenia implicate synaptic networks. Nature 506(7487):179-84.
NAP1L2	nucleosome assembly protein 1 like 2	WES	Fromer et al.,, (2014): De novo mutations in schizophrenia implicate synaptic networks. Nature 506(7487):179-84.
NAPA	NSF attachment protein alpha	WES	Purcell et al., (2014): A polygenic burden of rare disruptive mutations in schizophrenia. Nature 506:185-190.
NAPB	NSF attachment protein beta	WES	Purcell et al., (2014): A polygenic burden of rare disruptive mutations in schizophrenia. Nature 506:185-190.
NAPG	NSF attachment protein gamma	WES	Purcell et al., (2014): A polygenic burden of rare disruptive mutations in schizophrenia. Nature 506:185-190.
NAPSA	napsin A aspartic peptidase	sherlock integrative analysis (http://sherlock.ucsf.edu/)
NAT8L	N-acetyltransferase 8 like	WES	Purcell et al., (2014): A polygenic burden of rare disruptive mutations in schizophrenia. Nature 506:185-190.
NAV1	neuron navigator 1	WES	Purcell et al., (2014): A polygenic burden of rare disruptive mutations in schizophrenia. Nature 506:185-190.
NAV2	neuron navigator 2	WES	Purcell et al., (2014): A polygenic burden of rare disruptive mutations in schizophrenia. Nature 506:185-190.
NAV3	neuron navigator 3	WES	Purcell et al., (2014): A polygenic burden of rare disruptive mutations in schizophrenia. Nature 506:185-190.
NBEA	neurobeachin	WES	Fromer et al.,, (2014): De novo mutations in schizophrenia implicate synaptic networks. Nature 506(7487):179-84.
NCAM1	neural cell adhesion molecule 1	functional genomics	Ayalew M et al., (2012): Convergent functional genomics of schizophrenia: from comprehensive understanding to genetic risk prediction. Mol Psychiatry 17(9):887-905.
NCAM2	neural cell adhesion molecule 2	WES	Purcell et al., (2014): A polygenic burden of rare disruptive mutations in schizophrenia. Nature 506:185-190.
NCAN	neurocan	GWAS	Schizophrenia Working Group of the Psychiatric Genomics Consortium, (2014): Biological insights from 108 schizophrenia-associated genetic loci. Nature 511(7510):421-7.
NCDN	neurochondrin	WES	Purcell et al., (2014): A polygenic burden of rare disruptive mutations in schizophrenia. Nature 506:185-190.
NCK1	NCK adaptor protein 1	GWAS	Schizophrenia Working Group of the Psychiatric Genomics Consortium, (2014): Biological insights from 108 schizophrenia-associated genetic loci. Nature 511(7510):421-7.
NCKAP1	NCK associated protein 1	WES	Purcell et al., (2014): A polygenic burden of rare disruptive mutations in schizophrenia. Nature 506:185-190.
NCKIPSD	NCK interacting protein with SH3 domain	WES	Fromer et al.,, (2014): De novo mutations in schizophrenia implicate synaptic networks. Nature 506(7487):179-84.
NCOA1	nuclear receptor coactivator 1	WES	Purcell et al., (2014): A polygenic burden of rare disruptive mutations in schizophrenia. Nature 506:185-190.
NCOA2	nuclear receptor coactivator 2	WES	Purcell et al., (2014): A polygenic burden of rare disruptive mutations in schizophrenia. Nature 506:185-190.
NCOA6	nuclear receptor coactivator 6	WES	Purcell et al., (2014): A polygenic burden of rare disruptive mutations in schizophrenia. Nature 506:185-190.
NCOA7	nuclear receptor coactivator 7	methylation	Montano et al.,, (2016): Association of DNA Methylation Differences With Schizophrenia in an Epigenome-Wide Association Study. JAMA Psychiatry 73(5):506-14.
NCOR1	nuclear receptor corepressor 1	WES	Purcell et al., (2014): A polygenic burden of rare disruptive mutations in schizophrenia. Nature 506:185-190.
NCOR2	nuclear receptor corepressor 2	methylation	Aberg KA et al., (2014): Methylome-wide association study of schizophrenia: identifying blood biomarker signatures of environmental insults. JAMA Psychiatry 71(3):255-264.
NCS1	neuronal calcium sensor 1	WES	Purcell et al., (2014): A polygenic burden of rare disruptive mutations in schizophrenia. Nature 506:185-190.
NDE1	nudE neurodevelopment protein 1	CNV-bearing	Luo et al.,, (2014): Systematic prioritization and integrative analysis of copy number variations in schizophrenia reveal key schizophrenia susceptibility genes. Schizophr Bull 40(6):1285-99.
NDFIP2	Nedd4 family interacting protein 2	methylation	Montano et al.,, (2016): Association of DNA Methylation Differences With Schizophrenia in an Epigenome-Wide Association Study. JAMA Psychiatry 73(5):506-14.
NDRG2	NDRG family member 2	WES	Purcell et al., (2014): A polygenic burden of rare disruptive mutations in schizophrenia. Nature 506:185-190.
NDRG4	NDRG family member 4	WES	Purcell et al., (2014): A polygenic burden of rare disruptive mutations in schizophrenia. Nature 506:185-190.
NDST1	N-deacetylase/N-sulfotransferase 1	WES	Purcell et al., (2014): A polygenic burden of rare disruptive mutations in schizophrenia. Nature 506:185-190.
NDST3	N-deacetylase/N-sulfotransferase (heparan glucosaminyl) 3	GWAS	Lencz et al.,, (2013): Genome-wide association study implicates NDST3 in schizophrenia and bipolar disorder. Nat Commun 4:2739.
NDUFA13	NADH dehydrogenase (ubiquinone) 1 alpha subcomplex, 13	GWAS	Schizophrenia Working Group of the Psychiatric Genomics Consortium, (2014): Biological insights from 108 schizophrenia-associated genetic loci. Nature 511(7510):421-7.
NDUFA2	NADH dehydrogenase (ubiquinone) 1 alpha subcomplex, 2, 8kDa	GWAS	Schizophrenia Working Group of the Psychiatric Genomics Consortium, (2014): Biological insights from 108 schizophrenia-associated genetic loci. Nature 511(7510):421-7.
NDUFA4	NDUFA4, mitochondrial complex associated	WES	Purcell et al., (2014): A polygenic burden of rare disruptive mutations in schizophrenia. Nature 506:185-190.
NDUFA4L2	NADH dehydrogenase (ubiquinone) 1 alpha subcomplex, 4-like 2	GWAS	Schizophrenia Working Group of the Psychiatric Genomics Consortium, (2014): Biological insights from 108 schizophrenia-associated genetic loci. Nature 511(7510):421-7.
NDUFA6	NADH dehydrogenase (ubiquinone) 1 alpha subcomplex, 6, 14kDa	GWAS	Schizophrenia Working Group of the Psychiatric Genomics Consortium, (2014): Biological insights from 108 schizophrenia-associated genetic loci. Nature 511(7510):421-7.
NDUFA7	NADH:ubiquinone oxidoreductase subunit A7	WES	Purcell et al., (2014): A polygenic burden of rare disruptive mutations in schizophrenia. Nature 506:185-190.
NDUFB10	NADH:ubiquinone oxidoreductase subunit B10	WES	Purcell et al., (2014): A polygenic burden of rare disruptive mutations in schizophrenia. Nature 506:185-190.
NDUFB6	NADH:ubiquinone oxidoreductase subunit B6	WES	Purcell et al., (2014): A polygenic burden of rare disruptive mutations in schizophrenia. Nature 506:185-190.
NDUFB7	NADH:ubiquinone oxidoreductase subunit B7	WES	Purcell et al., (2014): A polygenic burden of rare disruptive mutations in schizophrenia. Nature 506:185-190.
NDUFS1	NADH:ubiquinone oxidoreductase core subunit S1	WES	Purcell et al., (2014): A polygenic burden of rare disruptive mutations in schizophrenia. Nature 506:185-190.
NDUFS2	NADH:ubiquinone oxidoreductase core subunit S2	WES	Purcell et al., (2014): A polygenic burden of rare disruptive mutations in schizophrenia. Nature 506:185-190.
NDUFS3	NADH:ubiquinone oxidoreductase core subunit S3	WES	Purcell et al., (2014): A polygenic burden of rare disruptive mutations in schizophrenia. Nature 506:185-190.
NDUFV2	NADH dehydrogenase (ubiquinone) flavoprotein 2, 24kDa	functional genomics	Ayalew M et al., (2012): Convergent functional genomics of schizophrenia: from comprehensive understanding to genetic risk prediction. Mol Psychiatry 17(9):887-905.
NEB	nebulin	WES	Fromer et al.,, (2014): De novo mutations in schizophrenia implicate synaptic networks. Nature 506(7487):179-84.
NEDD4	neural precursor cell expressed, developmentally down-regulated 4, E3 ubiquitin protein ligase	WES	Purcell et al., (2014): A polygenic burden of rare disruptive mutations in schizophrenia. Nature 506:185-190.
NEFH	neurofilament, heavy polypeptide	WES	Purcell et al., (2014): A polygenic burden of rare disruptive mutations in schizophrenia. Nature 506:185-190.
NEFM	neurofilament, medium polypeptide	WES	Purcell et al., (2014): A polygenic burden of rare disruptive mutations in schizophrenia. Nature 506:185-190.
NEGR1	neuronal growth regulator 1	WES	Purcell et al., (2014): A polygenic burden of rare disruptive mutations in schizophrenia. Nature 506:185-190.
NEK1	NIMA-related kinase 1	GWAS	Schizophrenia Working Group of the Psychiatric Genomics Consortium, (2014): Biological insights from 108 schizophrenia-associated genetic loci. Nature 511(7510):421-7.
NEK4	NIMA-related kinase 4	GWAS	Schizophrenia Working Group of the Psychiatric Genomics Consortium, (2014): Biological insights from 108 schizophrenia-associated genetic loci. Nature 511(7510):421-7.
NELF	NMDA receptor synaptonuclear signaling and neuronal migration factor	WES	Purcell et al., (2014): A polygenic burden of rare disruptive mutations in schizophrenia. Nature 506:185-190.
NES	nestin	linkage/association studies	Ng et al.,, (2009): Meta-analysis of 32 genome-wide linkage studies of schizophrenia. Mol Psychiatry 14(8):774-85.
NEURL4	neuralized E3 ubiquitin protein ligase 4	WES	Purcell et al., (2014): A polygenic burden of rare disruptive mutations in schizophrenia. Nature 506:185-190.
NEUROG1	neurogenin 1	linkage/association studies	Lewis et al.,, (2003): Genome scan meta-analysis of schizophrenia and bipolar disorder, part II: Schizophrenia. Am J Hum Genet 73(1):34-48.
NF1	neurofibromin 1	WES	Purcell et al., (2014): A polygenic burden of rare disruptive mutations in schizophrenia. Nature 506:185-190.
NFASC	neurofascin	WES	Fromer et al.,, (2014): De novo mutations in schizophrenia implicate synaptic networks. Nature 506(7487):179-84.
NFATC1	nuclear factor of activated T-cells 1	methylation	Montano et al.,, (2016): Association of DNA Methylation Differences With Schizophrenia in an Epigenome-Wide Association Study. JAMA Psychiatry 73(5):506-14.
NFATC3	nuclear factor of activated T-cells, cytoplasmic, calcineurin-dependent 3	GWAS	Schizophrenia Working Group of the Psychiatric Genomics Consortium, (2014): Biological insights from 108 schizophrenia-associated genetic loci. Nature 511(7510):421-7.
NFIC	nuclear factor I C	WES	Purcell et al., (2014): A polygenic burden of rare disruptive mutations in schizophrenia. Nature 506:185-190.
NFIX	nuclear factor I X	WES	Purcell et al., (2014): A polygenic burden of rare disruptive mutations in schizophrenia. Nature 506:185-190.
NFU1P2	NFU1 iron-sulfur cluster scaffold pseudogene 2	GWAS	Schizophrenia Working Group of the Psychiatric Genomics Consortium, (2014): Biological insights from 108 schizophrenia-associated genetic loci. Nature 511(7510):421-7.
NGEF	neuronal guanine nucleotide exchange factor	GWAS	Schizophrenia Working Group of the Psychiatric Genomics Consortium, (2014): Biological insights from 108 schizophrenia-associated genetic loci. Nature 511(7510):421-7.
NHSL1	NHS like 1	WES	Purcell et al., (2014): A polygenic burden of rare disruptive mutations in schizophrenia. Nature 506:185-190.
NID1	nidogen 1	WES	Fromer et al.,, (2014): De novo mutations in schizophrenia implicate synaptic networks. Nature 506(7487):179-84.
NIPA1	non imprinted in Prader-Willi/Angelman syndrome 1	CNV-bearing	Luo et al.,, (2014): Systematic prioritization and integrative analysis of copy number variations in schizophrenia reveal key schizophrenia susceptibility genes. Schizophr Bull 40(6):1285-99.
NIPAL3	NIPA like domain containing 3	WES	Fromer et al.,, (2014): De novo mutations in schizophrenia implicate synaptic networks. Nature 506(7487):179-84.
NIPBL	NIPBL, cohesin loading factor	WES	Fromer et al.,, (2014): De novo mutations in schizophrenia implicate synaptic networks. Nature 506(7487):179-84.
NISCH	nischarin	GWAS	Schizophrenia Working Group of the Psychiatric Genomics Consortium, (2014): Biological insights from 108 schizophrenia-associated genetic loci. Nature 511(7510):421-7.
NKAPL	NFKB activating protein-like	GWAS	Schizophrenia Working Group of the Psychiatric Genomics Consortium, (2014): Biological insights from 108 schizophrenia-associated genetic loci. Nature 511(7510):421-7.
NLGN2	neuroligin 2	WES	Purcell et al., (2014): A polygenic burden of rare disruptive mutations in schizophrenia. Nature 506:185-190.
NLGN3	neuroligin 3	WES	Purcell et al., (2014): A polygenic burden of rare disruptive mutations in schizophrenia. Nature 506:185-190.
NLGN4X	neuroligin 4, X-linked	GWAS	Schizophrenia Working Group of the Psychiatric Genomics Consortium, (2014): Biological insights from 108 schizophrenia-associated genetic loci. Nature 511(7510):421-7.
NLRC5	NLR family CARD domain containing 5	WES	Fromer et al.,, (2014): De novo mutations in schizophrenia implicate synaptic networks. Nature 506(7487):179-84.
NLRP1	NLR family pyrin domain containing 1	WES	Fromer et al.,, (2014): De novo mutations in schizophrenia implicate synaptic networks. Nature 506(7487):179-84.
NME1	NME/NM23 nucleoside diphosphate kinase 1	WES	Purcell et al., (2014): A polygenic burden of rare disruptive mutations in schizophrenia. Nature 506:185-190.
NME8	NME/NM23 family member 8	WES	Fromer et al.,, (2014): De novo mutations in schizophrenia implicate synaptic networks. Nature 506(7487):179-84.
NNT	nicotinamide nucleotide transhydrogenase	WES	Purcell et al., (2014): A polygenic burden of rare disruptive mutations in schizophrenia. Nature 506:185-190.
NOD2	nucleotide binding oligomerization domain containing 2	methylation	Montano et al.,, (2016): Association of DNA Methylation Differences With Schizophrenia in an Epigenome-Wide Association Study. JAMA Psychiatry 73(5):506-14.
NOMO1	NODAL modulator 1	WES	Purcell et al., (2014): A polygenic burden of rare disruptive mutations in schizophrenia. Nature 506:185-190.
NOS1	nitric oxide synthase 1 (neuronal)	linkage/association studies	Lewis et al.,, (2003): Genome scan meta-analysis of schizophrenia and bipolar disorder, part II: Schizophrenia. Am J Hum Genet 73(1):34-48.
NOS1AP	nitric oxide synthase 1 (neuronal) adaptor protein	linkage/association studies	Ng et al.,, (2009): Meta-analysis of 32 genome-wide linkage studies of schizophrenia. Mol Psychiatry 14(8):774-85.
NOS2	nitric oxide synthase 2	WES	Fromer et al.,, (2014): De novo mutations in schizophrenia implicate synaptic networks. Nature 506(7487):179-84.
NOS3	nitric oxide synthase 3	WES	Fromer et al.,, (2014): De novo mutations in schizophrenia implicate synaptic networks. Nature 506(7487):179-84.
NOSIP	nitric oxide synthase interacting protein	GWAS	Schizophrenia Working Group of the Psychiatric Genomics Consortium, (2014): Biological insights from 108 schizophrenia-associated genetic loci. Nature 511(7510):421-7.
NOTCH1	notch 1	WES	Fromer et al.,, (2014): De novo mutations in schizophrenia implicate synaptic networks. Nature 506(7487):179-84.
NOTCH2	notch 2	linkage/association studies	Ng et al.,, (2009): Meta-analysis of 32 genome-wide linkage studies of schizophrenia. Mol Psychiatry 14(8):774-85.
NOTCH4	notch 4	GWAS	Ikeda et al.,, (2013): Genetic evidence for association between NOTCH4 and schizophrenia supported by a GWAS follow-up study in a Japanese population. Mol Psychiatry 18(6):636-8.
NPAS2	neuronal PAS domain protein 2	WES	Purcell et al., (2014): A polygenic burden of rare disruptive mutations in schizophrenia. Nature 506:185-190.
NPAS3	neuronal PAS domain protein 3	linkage/association studies	Lewis et al.,, (2003): Genome scan meta-analysis of schizophrenia and bipolar disorder, part II: Schizophrenia. Am J Hum Genet 73(1):34-48.
NPDC1	neural proliferation, differentiation and control 1	methylation	Aberg KA et al., (2014): Methylome-wide association study of schizophrenia: identifying blood biomarker signatures of environmental insults. JAMA Psychiatry 71(3):255-264.
NPEPPS	aminopeptidase puromycin sensitive	WES	Purcell et al., (2014): A polygenic burden of rare disruptive mutations in schizophrenia. Nature 506:185-190.
NPHP1	nephronophthisis 1 (juvenile)	linkage/association studies	Lewis et al.,, (2003): Genome scan meta-analysis of schizophrenia and bipolar disorder, part II: Schizophrenia. Am J Hum Genet 73(1):34-48.
NPM1P46	nucleophosmin 1 (nucleolar phosphoprotein B23, numatrin) pseudogene 46	GWAS	Schizophrenia Working Group of the Psychiatric Genomics Consortium, (2014): Biological insights from 108 schizophrenia-associated genetic loci. Nature 511(7510):421-7.
NPRL2	NPR2-like, GATOR1 complex subunit	WES	Purcell et al., (2014): A polygenic burden of rare disruptive mutations in schizophrenia. Nature 506:185-190.
NPTN	neuroplastin	WES	Purcell et al., (2014): A polygenic burden of rare disruptive mutations in schizophrenia. Nature 506:185-190.
NPTXR	neuronal pentraxin receptor	WES	Purcell et al., (2014): A polygenic burden of rare disruptive mutations in schizophrenia. Nature 506:185-190.
NPY	neuropeptide Y	linkage/association studies	Lewis et al.,, (2003): Genome scan meta-analysis of schizophrenia and bipolar disorder, part II: Schizophrenia. Am J Hum Genet 73(1):34-48.
NQO2	NAD(P)H dehydrogenase, quinone 2	linkage/association studies	Lewis et al.,, (2003): Genome scan meta-analysis of schizophrenia and bipolar disorder, part II: Schizophrenia. Am J Hum Genet 73(1):34-48.
NR0B2	nuclear receptor subfamily 0 group B member 2	WES	Fromer et al.,, (2014): De novo mutations in schizophrenia implicate synaptic networks. Nature 506(7487):179-84.
NR2E3	nuclear receptor subfamily 2 group E member 3	WES	Fromer et al.,, (2014): De novo mutations in schizophrenia implicate synaptic networks. Nature 506(7487):179-84.
NR2F1	nuclear receptor subfamily 2 group F member 1	WES	Purcell et al., (2014): A polygenic burden of rare disruptive mutations in schizophrenia. Nature 506:185-190.
NR4A2	nuclear receptor subfamily 4, group A, member 2	functional genomics	Ayalew M et al., (2012): Convergent functional genomics of schizophrenia: from comprehensive understanding to genetic risk prediction. Mol Psychiatry 17(9):887-905.
NRCAM	neuronal cell adhesion molecule	functional genomics	Ayalew M et al., (2012): Convergent functional genomics of schizophrenia: from comprehensive understanding to genetic risk prediction. Mol Psychiatry 17(9):887-905.
NRG1	neuregulin 1	functional genomics	Ayalew M et al., (2012): Convergent functional genomics of schizophrenia: from comprehensive understanding to genetic risk prediction. Mol Psychiatry 17(9):887-905.
NRG2	neuregulin 2	linkage/association studies	Lewis et al.,, (2003): Genome scan meta-analysis of schizophrenia and bipolar disorder, part II: Schizophrenia. Am J Hum Genet 73(1):34-48.
NRGN	neurogranin (protein kinase C substrate, RC3)	GWAS	Schizophrenia Working Group of the Psychiatric Genomics Consortium, (2014): Biological insights from 108 schizophrenia-associated genetic loci. Nature 511(7510):421-7.
NRIP1	nuclear receptor interacting protein 1	WES	Purcell et al., (2014): A polygenic burden of rare disruptive mutations in schizophrenia. Nature 506:185-190.
NRN1L	neuritin 1-like	GWAS	Schizophrenia Working Group of the Psychiatric Genomics Consortium, (2014): Biological insights from 108 schizophrenia-associated genetic loci. Nature 511(7510):421-7.
NRXN1	neurexin 1	WES	Fromer et al.,, (2014): De novo mutations in schizophrenia implicate synaptic networks. Nature 506(7487):179-84.
NRXN1	neurexin 1	CNV-bearing	Luo et al.,, (2014): Systematic prioritization and integrative analysis of copy number variations in schizophrenia reveal key schizophrenia susceptibility genes. Schizophr Bull 40(6):1285-99.
NRXN2	neurexin 2	WES	Fromer et al.,, (2014): De novo mutations in schizophrenia implicate synaptic networks. Nature 506(7487):179-84.
NRXN3	neurexin 3	WES	Purcell et al., (2014): A polygenic burden of rare disruptive mutations in schizophrenia. Nature 506:185-190.
NSD1	nuclear receptor binding SET domain protein 1	WES	Fromer et al.,, (2014): De novo mutations in schizophrenia implicate synaptic networks. Nature 506(7487):179-84.
NSF	N-ethylmaleimide sensitive factor	WES	Purcell et al., (2014): A polygenic burden of rare disruptive mutations in schizophrenia. Nature 506:185-190.
NSFL1C	NSFL1 cofactor	WES	Purcell et al., (2014): A polygenic burden of rare disruptive mutations in schizophrenia. Nature 506:185-190.
NSUN7	NOP2/Sun RNA methyltransferase family member 7	methylation	Montano et al.,, (2016): Association of DNA Methylation Differences With Schizophrenia in an Epigenome-Wide Association Study. JAMA Psychiatry 73(5):506-14.
NT5C2	5'-nucleotidase, cytosolic II	GWAS	Schizophrenia Psychiatric Genome-Wide Association Study (GWAS) Consortium, (2011): Genome-wide association study identifies five new schizophrenia loci. Nat Genet 43(10):969-76.
NT5DC2	5'-nucleotidase domain containing 2	GWAS	Schizophrenia Working Group of the Psychiatric Genomics Consortium, (2014): Biological insights from 108 schizophrenia-associated genetic loci. Nature 511(7510):421-7.
NTAN1	N-terminal asparagine amidase	CNV-bearing	Luo et al.,, (2014): Systematic prioritization and integrative analysis of copy number variations in schizophrenia reveal key schizophrenia susceptibility genes. Schizophr Bull 40(6):1285-99.
NTF3	neurotrophin 3	linkage/association studies	Lewis et al.,, (2003): Genome scan meta-analysis of schizophrenia and bipolar disorder, part II: Schizophrenia. Am J Hum Genet 73(1):34-48.
NTM	neurotrimin	methylation	Aberg KA et al., (2014): Methylome-wide association study of schizophrenia: identifying blood biomarker signatures of environmental insults. JAMA Psychiatry 71(3):255-264.
NTNG1	netrin G1	linkage/association studies	Lewis et al.,, (2003): Genome scan meta-analysis of schizophrenia and bipolar disorder, part II: Schizophrenia. Am J Hum Genet 73(1):34-48.
NTRK2	neurotrophic receptor tyrosine kinase 2	WES	Purcell et al., (2014): A polygenic burden of rare disruptive mutations in schizophrenia. Nature 506:185-190.
NTRK3	neurotrophic receptor tyrosine kinase 3	WES	Purcell et al., (2014): A polygenic burden of rare disruptive mutations in schizophrenia. Nature 506:185-190.
NUMA1	nuclear mitotic apparatus protein 1	WES	Fromer et al.,, (2014): De novo mutations in schizophrenia implicate synaptic networks. Nature 506(7487):179-84.
NUMBL	numb homolog (Drosophila)-like	linkage/association studies	Lewis et al.,, (2003): Genome scan meta-analysis of schizophrenia and bipolar disorder, part II: Schizophrenia. Am J Hum Genet 73(1):34-48.
NUP188	nucleoporin 188	WES	Fromer et al.,, (2014): De novo mutations in schizophrenia implicate synaptic networks. Nature 506(7487):179-84.
NUP210	nucleoporin 210	WES	Fromer et al.,, (2014): De novo mutations in schizophrenia implicate synaptic networks. Nature 506(7487):179-84.
NUP37	nucleoporin 37	WES	Fromer et al.,, (2014): De novo mutations in schizophrenia implicate synaptic networks. Nature 506(7487):179-84.
NUP54	nucleoporin 54	WES	Purcell et al., (2014): A polygenic burden of rare disruptive mutations in schizophrenia. Nature 506:185-190.
NUP98	nucleoporin 98	WES	Purcell et al., (2014): A polygenic burden of rare disruptive mutations in schizophrenia. Nature 506:185-190.
NUPL2	nucleoporin like 2	WES	Fromer et al.,, (2014): De novo mutations in schizophrenia implicate synaptic networks. Nature 506(7487):179-84.
NUS1	NUS1 dehydrodolichyl diphosphate synthase subunit	methylation	Montano et al.,, (2016): Association of DNA Methylation Differences With Schizophrenia in an Epigenome-Wide Association Study. JAMA Psychiatry 73(5):506-14.
NUTF2	nuclear transport factor 2	GWAS	Schizophrenia Working Group of the Psychiatric Genomics Consortium, (2014): Biological insights from 108 schizophrenia-associated genetic loci. Nature 511(7510):421-7.
NVL	nuclear VCP-like	WES	Fromer et al.,, (2014): De novo mutations in schizophrenia implicate synaptic networks. Nature 506(7487):179-84.
NWD1	NACHT and WD repeat domain containing 1	WES	Purcell et al., (2014): A polygenic burden of rare disruptive mutations in schizophrenia. Nature 506:185-190.
NXF3	nuclear RNA export factor 3	WES	Fromer et al.,, (2014): De novo mutations in schizophrenia implicate synaptic networks. Nature 506(7487):179-84.
NXPH4	neurexophilin 4	GWAS	Schizophrenia Working Group of the Psychiatric Genomics Consortium, (2014): Biological insights from 108 schizophrenia-associated genetic loci. Nature 511(7510):421-7.
NYNRIN	NYN domain and retroviral integrase containing	WES	Fromer et al.,, (2014): De novo mutations in schizophrenia implicate synaptic networks. Nature 506(7487):179-84.
OBSCN	obscurin, cytoskeletal calmodulin and titin-interacting RhoGEF	WES	Fromer et al.,, (2014): De novo mutations in schizophrenia implicate synaptic networks. Nature 506(7487):179-84.
OGDH	oxoglutarate dehydrogenase	WES	Purcell et al., (2014): A polygenic burden of rare disruptive mutations in schizophrenia. Nature 506:185-190.
OGFOD2	2-oxoglutarate and iron-dependent oxygenase domain containing 2	GWAS	Schizophrenia Working Group of the Psychiatric Genomics Consortium, (2014): Biological insights from 108 schizophrenia-associated genetic loci. Nature 511(7510):421-7.
OGT	O-linked N-acetylglucosamine (GlcNAc) transferase	WES	Purcell et al., (2014): A polygenic burden of rare disruptive mutations in schizophrenia. Nature 506:185-190.
OIP5	Opa interacting protein 5	WES	Fromer et al.,, (2014): De novo mutations in schizophrenia implicate synaptic networks. Nature 506(7487):179-84.
OLA1P1	Obg-like ATPase 1 pseudogene 1	GWAS	Schizophrenia Working Group of the Psychiatric Genomics Consortium, (2014): Biological insights from 108 schizophrenia-associated genetic loci. Nature 511(7510):421-7.
OLFM1	olfactomedin 1	WES	Purcell et al., (2014): A polygenic burden of rare disruptive mutations in schizophrenia. Nature 506:185-190.
OLFM2	olfactomedin 2	WES	Fromer et al.,, (2014): De novo mutations in schizophrenia implicate synaptic networks. Nature 506(7487):179-84.
OLIG2	oligodendrocyte lineage transcription factor 2	linkage/association studies	Lewis et al.,, (2003): Genome scan meta-analysis of schizophrenia and bipolar disorder, part II: Schizophrenia. Am J Hum Genet 73(1):34-48.
OMG	oligodendrocyte myelin glycoprotein	WES	Purcell et al., (2014): A polygenic burden of rare disruptive mutations in schizophrenia. Nature 506:185-190.
OPA1	OPA1, mitochondrial dynamin like GTPase	WES	Purcell et al., (2014): A polygenic burden of rare disruptive mutations in schizophrenia. Nature 506:185-190.
OPCML	opioid binding protein/cell adhesion molecule-like	linkage/association studies	Allen et al., (2008): Systematic meta-analyses and field synopsis of genetic association studies in schizophrenia: the SzGene database. Nat Genet 40(7):827-34.
OR11A1	olfactory receptor family 11 subfamily A member 1	WES	Fromer et al.,, (2014): De novo mutations in schizophrenia implicate synaptic networks. Nature 506(7487):179-84.
OR2E1P	olfactory receptor, family 2, subfamily E, member 1 pseudogene	GWAS	Schizophrenia Working Group of the Psychiatric Genomics Consortium, (2014): Biological insights from 108 schizophrenia-associated genetic loci. Nature 511(7510):421-7.
OR4C46	olfactory receptor family 4 subfamily C member 46	WES	Purcell et al., (2014): A polygenic burden of rare disruptive mutations in schizophrenia. Nature 506:185-190.
OR5BA1P	olfactory receptor, family 5, subfamily BA, member 1 pseudogene	GWAS	Schizophrenia Working Group of the Psychiatric Genomics Consortium, (2014): Biological insights from 108 schizophrenia-associated genetic loci. Nature 511(7510):421-7.
OSBPL3	oxysterol binding protein-like 3	GWAS	Schizophrenia Working Group of the Psychiatric Genomics Consortium, (2014): Biological insights from 108 schizophrenia-associated genetic loci. Nature 511(7510):421-7.
OTUD7B	OTU deubiquitinase 7B	GWAS	Schizophrenia Working Group of the Psychiatric Genomics Consortium, (2014): Biological insights from 108 schizophrenia-associated genetic loci. Nature 511(7510):421-7.
OXCT1	3-oxoacid CoA-transferase 1	WES	Purcell et al., (2014): A polygenic burden of rare disruptive mutations in schizophrenia. Nature 506:185-190.
OXR1	oxidation resistance 1	WES	Purcell et al., (2014): A polygenic burden of rare disruptive mutations in schizophrenia. Nature 506:185-190.
P2RY2	purinergic receptor P2Y2	WES	Purcell et al., (2014): A polygenic burden of rare disruptive mutations in schizophrenia. Nature 506:185-190.
PABPC1	poly(A) binding protein cytoplasmic 1	WES	Purcell et al., (2014): A polygenic burden of rare disruptive mutations in schizophrenia. Nature 506:185-190.
PACS1	phosphofurin acidic cluster sorting protein 1	WES	Purcell et al., (2014): A polygenic burden of rare disruptive mutations in schizophrenia. Nature 506:185-190.
PACS2	phosphofurin acidic cluster sorting protein 2	methylation	Montano et al.,, (2016): Association of DNA Methylation Differences With Schizophrenia in an Epigenome-Wide Association Study. JAMA Psychiatry 73(5):506-14.
PACSIN1	protein kinase C and casein kinase substrate in neurons 1	WES	Purcell et al., (2014): A polygenic burden of rare disruptive mutations in schizophrenia. Nature 506:185-190.
PAG1	phosphoprotein membrane anchor with glycosphingolipid microdomains 1	WES	Purcell et al., (2014): A polygenic burden of rare disruptive mutations in schizophrenia. Nature 506:185-190.
PAICS	phosphoribosylaminoimidazole carboxylase; phosphoribosylaminoimidazolesuccinocarboxamide synthase	WES	Purcell et al., (2014): A polygenic burden of rare disruptive mutations in schizophrenia. Nature 506:185-190.
PAK1	p21 (RAC1) activated kinase 1	WES	Purcell et al., (2014): A polygenic burden of rare disruptive mutations in schizophrenia. Nature 506:185-190.
PAK6	p21 protein (Cdc42/Rac)-activated kinase 6	GWAS	Schizophrenia Working Group of the Psychiatric Genomics Consortium, (2014): Biological insights from 108 schizophrenia-associated genetic loci. Nature 511(7510):421-7.
PALM	paralemmin	WES	Purcell et al., (2014): A polygenic burden of rare disruptive mutations in schizophrenia. Nature 506:185-190.
PALM2	paralemmin 2	WES	Purcell et al., (2014): A polygenic burden of rare disruptive mutations in schizophrenia. Nature 506:185-190.
PAM	peptidylglycine alpha-amidating monooxygenase	linkage/association studies	Ng et al.,, (2009): Meta-analysis of 32 genome-wide linkage studies of schizophrenia. Mol Psychiatry 14(8):774-85.
PAPPA2	pappalysin 2	WES	Purcell et al., (2014): A polygenic burden of rare disruptive mutations in schizophrenia. Nature 506:185-190.
PAPSS2	3'-phosphoadenosine 5'-phosphosulfate synthase 2	WES	Fromer et al.,, (2014): De novo mutations in schizophrenia implicate synaptic networks. Nature 506(7487):179-84.
PAQR8	progestin and adipoQ receptor family member 8	WES	Fromer et al.,, (2014): De novo mutations in schizophrenia implicate synaptic networks. Nature 506(7487):179-84.
PAQR9	progestin and adipoQ receptor family member 9	WES	Fromer et al.,, (2014): De novo mutations in schizophrenia implicate synaptic networks. Nature 506(7487):179-84.
PARD6A	par-6 family cell polarity regulator alpha	GWAS	Schizophrenia Working Group of the Psychiatric Genomics Consortium, (2014): Biological insights from 108 schizophrenia-associated genetic loci. Nature 511(7510):421-7.
PARK2	parkin RBR E3 ubiquitin protein ligase	CNV-bearing	Luo et al.,, (2014): Systematic prioritization and integrative analysis of copy number variations in schizophrenia reveal key schizophrenia susceptibility genes. Schizophr Bull 40(6):1285-99.
PARM1	prostate androgen-regulated mucin-like protein 1	WES	Fromer et al.,, (2014): De novo mutations in schizophrenia implicate synaptic networks. Nature 506(7487):179-84.
PAX5	paired box 5	WES	Fromer et al.,, (2014): De novo mutations in schizophrenia implicate synaptic networks. Nature 506(7487):179-84.
PBRM1	polybromo 1	GWAS	Schizophrenia Working Group of the Psychiatric Genomics Consortium, (2014): Biological insights from 108 schizophrenia-associated genetic loci. Nature 511(7510):421-7.
PBX1	PBX homeobox 1	WES	Fromer et al.,, (2014): De novo mutations in schizophrenia implicate synaptic networks. Nature 506(7487):179-84.
PBX4	pre-B-cell leukemia homeobox 4	GWAS	Schizophrenia Working Group of the Psychiatric Genomics Consortium, (2014): Biological insights from 108 schizophrenia-associated genetic loci. Nature 511(7510):421-7.
PBXIP1	PBX homeobox interacting protein 1	WES	Purcell et al., (2014): A polygenic burden of rare disruptive mutations in schizophrenia. Nature 506:185-190.
PCBP2	poly(rC) binding protein 2	WES	Purcell et al., (2014): A polygenic burden of rare disruptive mutations in schizophrenia. Nature 506:185-190.
PCCB	propionyl CoA carboxylase, beta polypeptide	GWAS	Schizophrenia Working Group of the Psychiatric Genomics Consortium, (2014): Biological insights from 108 schizophrenia-associated genetic loci. Nature 511(7510):421-7.
PCDH1	protocadherin 1	WES	Purcell et al., (2014): A polygenic burden of rare disruptive mutations in schizophrenia. Nature 506:185-190.
PCDH10	protocadherin 10	WES	Fromer et al.,, (2014): De novo mutations in schizophrenia implicate synaptic networks. Nature 506(7487):179-84.
PCDH7	protocadherin 7	WES	Purcell et al., (2014): A polygenic burden of rare disruptive mutations in schizophrenia. Nature 506:185-190.
PCDH9	protocadherin 9	WES	Purcell et al., (2014): A polygenic burden of rare disruptive mutations in schizophrenia. Nature 506:185-190.
PCDHA1	protocadherin alpha 1	GWAS	Schizophrenia Working Group of the Psychiatric Genomics Consortium, (2014): Biological insights from 108 schizophrenia-associated genetic loci. Nature 511(7510):421-7.
PCDHA10	protocadherin alpha 10	GWAS	Schizophrenia Working Group of the Psychiatric Genomics Consortium, (2014): Biological insights from 108 schizophrenia-associated genetic loci. Nature 511(7510):421-7.
PCDHA2	protocadherin alpha 2	GWAS	Schizophrenia Working Group of the Psychiatric Genomics Consortium, (2014): Biological insights from 108 schizophrenia-associated genetic loci. Nature 511(7510):421-7.
PCDHA3	protocadherin alpha 3	GWAS	Schizophrenia Working Group of the Psychiatric Genomics Consortium, (2014): Biological insights from 108 schizophrenia-associated genetic loci. Nature 511(7510):421-7.
PCDHA4	protocadherin alpha 4	GWAS	Schizophrenia Working Group of the Psychiatric Genomics Consortium, (2014): Biological insights from 108 schizophrenia-associated genetic loci. Nature 511(7510):421-7.
PCDHA5	protocadherin alpha 5	GWAS	Schizophrenia Working Group of the Psychiatric Genomics Consortium, (2014): Biological insights from 108 schizophrenia-associated genetic loci. Nature 511(7510):421-7.
PCDHA6	protocadherin alpha 6	GWAS	Schizophrenia Working Group of the Psychiatric Genomics Consortium, (2014): Biological insights from 108 schizophrenia-associated genetic loci. Nature 511(7510):421-7.
PCDHA7	protocadherin alpha 7	GWAS	Schizophrenia Working Group of the Psychiatric Genomics Consortium, (2014): Biological insights from 108 schizophrenia-associated genetic loci. Nature 511(7510):421-7.
PCDHA8	protocadherin alpha 8	GWAS	Schizophrenia Working Group of the Psychiatric Genomics Consortium, (2014): Biological insights from 108 schizophrenia-associated genetic loci. Nature 511(7510):421-7.
PCDHA9	protocadherin alpha 9	GWAS	Schizophrenia Working Group of the Psychiatric Genomics Consortium, (2014): Biological insights from 108 schizophrenia-associated genetic loci. Nature 511(7510):421-7.
PCDHAC2	protocadherin alpha subfamily C, 2	WES	Fromer et al.,, (2014): De novo mutations in schizophrenia implicate synaptic networks. Nature 506(7487):179-84.
PCDHGA11	protocadherin gamma subfamily A, 11	WES	Fromer et al.,, (2014): De novo mutations in schizophrenia implicate synaptic networks. Nature 506(7487):179-84.
PCDHGA12	protocadherin gamma subfamily A, 12	WES	Purcell et al., (2014): A polygenic burden of rare disruptive mutations in schizophrenia. Nature 506:185-190.
PCDHGC3	protocadherin gamma subfamily C, 3	WES	Purcell et al., (2014): A polygenic burden of rare disruptive mutations in schizophrenia. Nature 506:185-190.
PCGEM1	PCGEM1, prostate-specific transcript (non-protein coding)	GWAS	Schizophrenia Psychiatric Genome-Wide Association Study (GWAS) Consortium, (2011): Genome-wide association study identifies five new schizophrenia loci. Nat Genet 43(10):969-76.
PCGF6	polycomb group ring finger 6	GWAS	Schizophrenia Working Group of the Psychiatric Genomics Consortium, (2014): Biological insights from 108 schizophrenia-associated genetic loci. Nature 511(7510):421-7.
PCLO	piccolo presynaptic cytomatrix protein	WES	Purcell et al., (2014): A polygenic burden of rare disruptive mutations in schizophrenia. Nature 506:185-190.
PCM1	pericentriolar material 1	linkage/association studies	Lewis et al.,, (2003): Genome scan meta-analysis of schizophrenia and bipolar disorder, part II: Schizophrenia. Am J Hum Genet 73(1):34-48.
PCMT1	protein-L-isoaspartate (D-aspartate) O-methyltransferase	WES	Purcell et al., (2014): A polygenic burden of rare disruptive mutations in schizophrenia. Nature 506:185-190.
PCNT	pericentrin	WES	Fromer et al.,, (2014): De novo mutations in schizophrenia implicate synaptic networks. Nature 506(7487):179-84.
PCNX	pecanex homolog 1 (Drosophila)	WES	Purcell et al., (2014): A polygenic burden of rare disruptive mutations in schizophrenia. Nature 506:185-190.
PCNXL2	pecanex homolog 2 (Drosophila)	WES	Purcell et al., (2014): A polygenic burden of rare disruptive mutations in schizophrenia. Nature 506:185-190.
PCNXL3	pecanex homolog 3 (Drosophila)	WES	Fromer et al.,, (2014): De novo mutations in schizophrenia implicate synaptic networks. Nature 506(7487):179-84.
PDCD11	programmed cell death 11	GWAS	Schizophrenia Working Group of the Psychiatric Genomics Consortium, (2014): Biological insights from 108 schizophrenia-associated genetic loci. Nature 511(7510):421-7.
PDCD6IP	programmed cell death 6 interacting protein	WES	Purcell et al., (2014): A polygenic burden of rare disruptive mutations in schizophrenia. Nature 506:185-190.
PDE2A	phosphodiesterase 2A	WES	Purcell et al., (2014): A polygenic burden of rare disruptive mutations in schizophrenia. Nature 506:185-190.
PDE3B	phosphodiesterase 3B	WES	Fromer et al.,, (2014): De novo mutations in schizophrenia implicate synaptic networks. Nature 506(7487):179-84.
PDE4B	phosphodiesterase 4B, cAMP-specific	functional genomics	Ayalew M et al., (2012): Convergent functional genomics of schizophrenia: from comprehensive understanding to genetic risk prediction. Mol Psychiatry 17(9):887-905.
PDE4DIP	phosphodiesterase 4D interacting protein	WES	Fromer et al.,, (2014): De novo mutations in schizophrenia implicate synaptic networks. Nature 506(7487):179-84.
PDE8B	phosphodiesterase 8B	WES	Purcell et al., (2014): A polygenic burden of rare disruptive mutations in schizophrenia. Nature 506:185-190.
PDHA1	pyruvate dehydrogenase (lipoamide) alpha 1	WES	Purcell et al., (2014): A polygenic burden of rare disruptive mutations in schizophrenia. Nature 506:185-190.
PDHB	pyruvate dehydrogenase (lipoamide) beta	WES	Purcell et al., (2014): A polygenic burden of rare disruptive mutations in schizophrenia. Nature 506:185-190.
PDLIM5	PDZ and LIM domain 5	linkage/association studies	Lewis et al.,, (2003): Genome scan meta-analysis of schizophrenia and bipolar disorder, part II: Schizophrenia. Am J Hum Genet 73(1):34-48.
PDS5B	PDS5 cohesin associated factor B	WES	Purcell et al., (2014): A polygenic burden of rare disruptive mutations in schizophrenia. Nature 506:185-190.
PDZD2	PDZ domain containing 2	WES	Fromer et al.,, (2014): De novo mutations in schizophrenia implicate synaptic networks. Nature 506(7487):179-84.
PDZD8	PDZ domain containing 8	WES	Purcell et al., (2014): A polygenic burden of rare disruptive mutations in schizophrenia. Nature 506:185-190.
PEA15	phosphoprotein enriched in astrocytes 15	WES	Purcell et al., (2014): A polygenic burden of rare disruptive mutations in schizophrenia. Nature 506:185-190.
PEAK1	pseudopodium enriched atypical kinase 1	methylation	Aberg KA et al., (2014): Methylome-wide association study of schizophrenia: identifying blood biomarker signatures of environmental insults. JAMA Psychiatry 71(3):255-264.
PEBP1	phosphatidylethanolamine binding protein 1	WES	Purcell et al., (2014): A polygenic burden of rare disruptive mutations in schizophrenia. Nature 506:185-190.
PEG3	paternally expressed 3	WES	Purcell et al., (2014): A polygenic burden of rare disruptive mutations in schizophrenia. Nature 506:185-190.
PEG3,ZIM2	-	WES	Fromer et al.,, (2014): De novo mutations in schizophrenia implicate synaptic networks. Nature 506(7487):179-84.
PELI2	pellino E3 ubiquitin protein ligase family member 2	methylation	Aberg KA et al., (2014): Methylome-wide association study of schizophrenia: identifying blood biomarker signatures of environmental insults. JAMA Psychiatry 71(3):255-264.
PER1	period circadian clock 1	WES	Purcell et al., (2014): A polygenic burden of rare disruptive mutations in schizophrenia. Nature 506:185-190.
PEX1	peroxisomal biogenesis factor 1	WES	Fromer et al.,, (2014): De novo mutations in schizophrenia implicate synaptic networks. Nature 506(7487):179-84.
PEX16	peroxisomal biogenesis factor 16	WES	Fromer et al.,, (2014): De novo mutations in schizophrenia implicate synaptic networks. Nature 506(7487):179-84.
PFKL	phosphofructokinase, liver type	WES	Purcell et al., (2014): A polygenic burden of rare disruptive mutations in schizophrenia. Nature 506:185-190.
PFKM	phosphofructokinase, muscle	WES	Purcell et al., (2014): A polygenic burden of rare disruptive mutations in schizophrenia. Nature 506:185-190.
PFKP	phosphofructokinase, platelet	WES	Purcell et al., (2014): A polygenic burden of rare disruptive mutations in schizophrenia. Nature 506:185-190.
PFN2	profilin 2	WES	Purcell et al., (2014): A polygenic burden of rare disruptive mutations in schizophrenia. Nature 506:185-190.
PGAM1	phosphoglycerate mutase 1	WES	Purcell et al., (2014): A polygenic burden of rare disruptive mutations in schizophrenia. Nature 506:185-190.
PGBD1	piggyBac transposable element derived 1	GWAS	Schizophrenia Working Group of the Psychiatric Genomics Consortium, (2014): Biological insights from 108 schizophrenia-associated genetic loci. Nature 511(7510):421-7.
PGD	phosphogluconate dehydrogenase	WES	Purcell et al., (2014): A polygenic burden of rare disruptive mutations in schizophrenia. Nature 506:185-190.
PGK1	phosphoglycerate kinase 1	WES	Purcell et al., (2014): A polygenic burden of rare disruptive mutations in schizophrenia. Nature 506:185-190.
PGM2L1	phosphoglucomutase 2-like 1	WES	Purcell et al., (2014): A polygenic burden of rare disruptive mutations in schizophrenia. Nature 506:185-190.
PHACTR1	phosphatase and actin regulator 1	WES	Purcell et al., (2014): A polygenic burden of rare disruptive mutations in schizophrenia. Nature 506:185-190.
PHB	prohibitin	WES	Purcell et al., (2014): A polygenic burden of rare disruptive mutations in schizophrenia. Nature 506:185-190.
PHC2	polyhomeotic homolog 2	WES	Fromer et al.,, (2014): De novo mutations in schizophrenia implicate synaptic networks. Nature 506(7487):179-84.
PHF12	PHD finger protein 12	WES	Purcell et al., (2014): A polygenic burden of rare disruptive mutations in schizophrenia. Nature 506:185-190.
PHF19	PHD finger protein 19	WES	Fromer et al.,, (2014): De novo mutations in schizophrenia implicate synaptic networks. Nature 506(7487):179-84.
PHF20	PHD finger protein 20	WES	Purcell et al., (2014): A polygenic burden of rare disruptive mutations in schizophrenia. Nature 506:185-190.
PHF23	PHD finger protein 23	WES	Purcell et al., (2014): A polygenic burden of rare disruptive mutations in schizophrenia. Nature 506:185-190.
PHF7	PHD finger protein 7	WES	Fromer et al.,, (2014): De novo mutations in schizophrenia implicate synaptic networks. Nature 506(7487):179-84.
PHGDH	phosphoglycerate dehydrogenase	WES	Purcell et al., (2014): A polygenic burden of rare disruptive mutations in schizophrenia. Nature 506:185-190.
PHLDB1	pleckstrin homology like domain family B member 1	WES	Fromer et al.,, (2014): De novo mutations in schizophrenia implicate synaptic networks. Nature 506(7487):179-84.
PHLPP1	PH domain and leucine rich repeat protein phosphatase 1	methylation	Montano et al.,, (2016): Association of DNA Methylation Differences With Schizophrenia in an Epigenome-Wide Association Study. JAMA Psychiatry 73(5):506-14.
PHYHIP	phytanoyl-CoA 2-hydroxylase interacting protein	WES	Purcell et al., (2014): A polygenic burden of rare disruptive mutations in schizophrenia. Nature 506:185-190.
PI15	peptidase inhibitor 15	WES	Fromer et al.,, (2014): De novo mutations in schizophrenia implicate synaptic networks. Nature 506(7487):179-84.
PI4KA	phosphatidylinositol 4-kinase alpha	WES	Purcell et al., (2014): A polygenic burden of rare disruptive mutations in schizophrenia. Nature 506:185-190.
PICK1	protein interacting with PRKCA 1	linkage/association studies	Lewis et al.,, (2003): Genome scan meta-analysis of schizophrenia and bipolar disorder, part II: Schizophrenia. Am J Hum Genet 73(1):34-48.
PIGQ	phosphatidylinositol glycan anchor biosynthesis class Q	WES	Purcell et al., (2014): A polygenic burden of rare disruptive mutations in schizophrenia. Nature 506:185-190.
PIK3C2B	phosphatidylinositol-4-phosphate 3-kinase catalytic subunit type 2 beta	WES	Fromer et al.,, (2014): De novo mutations in schizophrenia implicate synaptic networks. Nature 506(7487):179-84.
PIK3C3	phosphatidylinositol 3-kinase, catalytic subunit type 3	linkage/association studies	Lewis et al.,, (2003): Genome scan meta-analysis of schizophrenia and bipolar disorder, part II: Schizophrenia. Am J Hum Genet 73(1):34-48.
PIK3CB	phosphatidylinositol-4,5-bisphosphate 3-kinase catalytic subunit beta	WES	Purcell et al., (2014): A polygenic burden of rare disruptive mutations in schizophrenia. Nature 506:185-190.
PIK3R1	phosphoinositide-3-kinase regulatory subunit 1	methylation	Aberg KA et al., (2014): Methylome-wide association study of schizophrenia: identifying blood biomarker signatures of environmental insults. JAMA Psychiatry 71(3):255-264.
PIK3R3	phosphoinositide-3-kinase regulatory subunit 3	methylation	Montano et al.,, (2016): Association of DNA Methylation Differences With Schizophrenia in an Epigenome-Wide Association Study. JAMA Psychiatry 73(5):506-14.
PIKFYVE	phosphoinositide kinase, FYVE-type zinc finger containing	WES	Purcell et al., (2014): A polygenic burden of rare disruptive mutations in schizophrenia. Nature 506:185-190.
PIM1	Pim-1 proto-oncogene, serine/threonine kinase	WES	Fromer et al.,, (2014): De novo mutations in schizophrenia implicate synaptic networks. Nature 506(7487):179-84.
PIN1	peptidylprolyl cis/trans isomerase, NIMA-interacting 1	WES	Purcell et al., (2014): A polygenic burden of rare disruptive mutations in schizophrenia. Nature 506:185-190.
PINK1	PTEN induced putative kinase 1	WES	Purcell et al., (2014): A polygenic burden of rare disruptive mutations in schizophrenia. Nature 506:185-190.
PIP4K2A	phosphatidylinositol-5-phosphate 4-kinase, type II, alpha	linkage/association studies	Lewis et al.,, (2003): Genome scan meta-analysis of schizophrenia and bipolar disorder, part II: Schizophrenia. Am J Hum Genet 73(1):34-48.
PIP4K2B	phosphatidylinositol-5-phosphate 4-kinase type 2 beta	WES	Purcell et al., (2014): A polygenic burden of rare disruptive mutations in schizophrenia. Nature 506:185-190.
PIP4K2C	phosphatidylinositol-5-phosphate 4-kinase type 2 gamma	WES	Fromer et al.,, (2014): De novo mutations in schizophrenia implicate synaptic networks. Nature 506(7487):179-84.
PIP5K1C	phosphatidylinositol-4-phosphate 5-kinase type 1 gamma	WES	Purcell et al., (2014): A polygenic burden of rare disruptive mutations in schizophrenia. Nature 506:185-190.
PITPNM1	phosphatidylinositol transfer protein membrane associated 1	WES	Purcell et al., (2014): A polygenic burden of rare disruptive mutations in schizophrenia. Nature 506:185-190.
PITPNM2	phosphatidylinositol transfer protein, membrane-associated 2	GWAS	Schizophrenia Working Group of the Psychiatric Genomics Consortium, (2014): Biological insights from 108 schizophrenia-associated genetic loci. Nature 511(7510):421-7.
PJA1	praja ring finger 1, E3 ubiquitin protein ligase	GWAS	Schizophrenia Working Group of the Psychiatric Genomics Consortium, (2014): Biological insights from 108 schizophrenia-associated genetic loci. Nature 511(7510):421-7.
PJA2	praja ring finger ubiquitin ligase 2	WES	Purcell et al., (2014): A polygenic burden of rare disruptive mutations in schizophrenia. Nature 506:185-190.
PKD1	polycystin 1, transient receptor potential channel interacting	WES	Purcell et al., (2014): A polygenic burden of rare disruptive mutations in schizophrenia. Nature 506:185-190.
PKP4	plakophilin 4	WES	Purcell et al., (2014): A polygenic burden of rare disruptive mutations in schizophrenia. Nature 506:185-190.
PLA2G12B	phospholipase A2 group XIIB	WES	Purcell et al., (2014): A polygenic burden of rare disruptive mutations in schizophrenia. Nature 506:185-190.
PLA2G15	phospholipase A2, group XV	GWAS	Schizophrenia Working Group of the Psychiatric Genomics Consortium, (2014): Biological insights from 108 schizophrenia-associated genetic loci. Nature 511(7510):421-7.
PLA2G4A	phospholipase A2, group IVA (cytosolic, calcium-dependent)	linkage/association studies	Lewis et al.,, (2003): Genome scan meta-analysis of schizophrenia and bipolar disorder, part II: Schizophrenia. Am J Hum Genet 73(1):34-48.
PLA2G6	phospholipase A2, group VI (cytosolic, calcium-independent)	linkage/association studies	Lewis et al.,, (2003): Genome scan meta-analysis of schizophrenia and bipolar disorder, part II: Schizophrenia. Am J Hum Genet 73(1):34-48.
PLAA	phospholipase A2-activating protein	GWAS	Schizophrenia Working Group of the Psychiatric Genomics Consortium, (2014): Biological insights from 108 schizophrenia-associated genetic loci. Nature 511(7510):421-7.
PLCB1	phospholipase C beta 1	WES	Purcell et al., (2014): A polygenic burden of rare disruptive mutations in schizophrenia. Nature 506:185-190.
PLCB2	phospholipase C, beta 2	GWAS	Schizophrenia Working Group of the Psychiatric Genomics Consortium, (2014): Biological insights from 108 schizophrenia-associated genetic loci. Nature 511(7510):421-7.
PLCB2-AS1	PLCB2 antisense RNA 1	GWAS	Schizophrenia Working Group of the Psychiatric Genomics Consortium, (2014): Biological insights from 108 schizophrenia-associated genetic loci. Nature 511(7510):421-7.
PLCD4	phospholipase C delta 4	sherlock integrative analysis (http://sherlock.ucsf.edu/)
PLCH2	phospholipase C, eta 2	GWAS	Schizophrenia Working Group of the Psychiatric Genomics Consortium, (2014): Biological insights from 108 schizophrenia-associated genetic loci. Nature 511(7510):421-7.
PLCL1	phospholipase C-like 1	GWAS	Schizophrenia Working Group of the Psychiatric Genomics Consortium, (2014): Biological insights from 108 schizophrenia-associated genetic loci. Nature 511(7510):421-7.
PLCL2	phospholipase C like 2	WES	Purcell et al., (2014): A polygenic burden of rare disruptive mutations in schizophrenia. Nature 506:185-190.
PLD3	phospholipase D family member 3	WES	Purcell et al., (2014): A polygenic burden of rare disruptive mutations in schizophrenia. Nature 506:185-190.
PLD5	phospholipase D family member 5	methylation	Montano et al.,, (2016): Association of DNA Methylation Differences With Schizophrenia in an Epigenome-Wide Association Study. JAMA Psychiatry 73(5):506-14.
PLEC	plectin	WES	Purcell et al., (2014): A polygenic burden of rare disruptive mutations in schizophrenia. Nature 506:185-190.
PLEKHA6	pleckstrin homology domain containing A6	WES	Fromer et al.,, (2014): De novo mutations in schizophrenia implicate synaptic networks. Nature 506(7487):179-84.
PLEKHH1	pleckstrin homology, MyTH4 and FERM domain containing H1	WES	Fromer et al.,, (2014): De novo mutations in schizophrenia implicate synaptic networks. Nature 506(7487):179-84.
PLEKHO1	pleckstrin homology domain containing, family O member 1	GWAS	Schizophrenia Working Group of the Psychiatric Genomics Consortium, (2014): Biological insights from 108 schizophrenia-associated genetic loci. Nature 511(7510):421-7.
PLP1	proteolipid protein 1	WES	Purcell et al., (2014): A polygenic burden of rare disruptive mutations in schizophrenia. Nature 506:185-190.
PLXNA1	plexin A1	WES	Fromer et al.,, (2014): De novo mutations in schizophrenia implicate synaptic networks. Nature 506(7487):179-84.
PLXNA2	plexin A2	linkage/association studies	Allen et al., (2008): Systematic meta-analyses and field synopsis of genetic association studies in schizophrenia: the SzGene database. Nat Genet 40(7):827-34.
PLXNA4	plexin A4	WES	Purcell et al., (2014): A polygenic burden of rare disruptive mutations in schizophrenia. Nature 506:185-190.
PLXNB1	plexin B1	WES	Purcell et al., (2014): A polygenic burden of rare disruptive mutations in schizophrenia. Nature 506:185-190.
PLXND1	plexin D1	WES	Fromer et al.,, (2014): De novo mutations in schizophrenia implicate synaptic networks. Nature 506(7487):179-84.
PMFBP1	polyamine modulated factor 1 binding protein 1	WES	Fromer et al.,, (2014): De novo mutations in schizophrenia implicate synaptic networks. Nature 506(7487):179-84.
PML	promyelocytic leukemia	WES	Purcell et al., (2014): A polygenic burden of rare disruptive mutations in schizophrenia. Nature 506:185-190.
PNPO	pyridoxamine 5'-phosphate oxidase	methylation	Montano et al.,, (2016): Association of DNA Methylation Differences With Schizophrenia in an Epigenome-Wide Association Study. JAMA Psychiatry 73(5):506-14.
PODXL	podocalyxin-like	GWAS	Schizophrenia Working Group of the Psychiatric Genomics Consortium, (2014): Biological insights from 108 schizophrenia-associated genetic loci. Nature 511(7510):421-7.
POGZ	pogo transposable element with ZNF domain	WES	Fromer et al.,, (2014): De novo mutations in schizophrenia implicate synaptic networks. Nature 506(7487):179-84.
POLL	polymerase (DNA) lambda	WES	Fromer et al.,, (2014): De novo mutations in schizophrenia implicate synaptic networks. Nature 506(7487):179-84.
POLR2A	polymerase (RNA) II subunit A	WES	Purcell et al., (2014): A polygenic burden of rare disruptive mutations in schizophrenia. Nature 506:185-190.
POM121C	POM121 transmembrane nucleoporin C	WES	Fromer et al.,, (2014): De novo mutations in schizophrenia implicate synaptic networks. Nature 506(7487):179-84.
POMT1	protein O-mannosyltransferase 1	WES	Fromer et al.,, (2014): De novo mutations in schizophrenia implicate synaptic networks. Nature 506(7487):179-84.
POR	cytochrome p450 oxidoreductase	methylation	Aberg KA et al., (2014): Methylome-wide association study of schizophrenia: identifying blood biomarker signatures of environmental insults. JAMA Psychiatry 71(3):255-264.
POU3F2	POU class 3 homeobox 2	functional study	Lin et al.,, (2011): RNA-Seq of human neurons derived from iPS cells reveals candidate long non-coding RNAs involved in neurogenesis and neuropsychiatric disorders. PLoS One 6(9):e23356.
PPARA	peroxisome proliferator activated receptor alpha	methylation	Aberg KA et al., (2014): Methylome-wide association study of schizophrenia: identifying blood biomarker signatures of environmental insults. JAMA Psychiatry 71(3):255-264.
PPARGC1A	PPARG coactivator 1 alpha	WES	Purcell et al., (2014): A polygenic burden of rare disruptive mutations in schizophrenia. Nature 506:185-190.
PPFIA1	PTPRF interacting protein alpha 1	WES	Purcell et al., (2014): A polygenic burden of rare disruptive mutations in schizophrenia. Nature 506:185-190.
PPFIA2	PTPRF interacting protein alpha 2	WES	Purcell et al., (2014): A polygenic burden of rare disruptive mutations in schizophrenia. Nature 506:185-190.
PPFIA3	PTPRF interacting protein alpha 3	WES	Purcell et al., (2014): A polygenic burden of rare disruptive mutations in schizophrenia. Nature 506:185-190.
PPFIA4	PTPRF interacting protein alpha 4	WES	Purcell et al., (2014): A polygenic burden of rare disruptive mutations in schizophrenia. Nature 506:185-190.
PPIA	peptidylprolyl isomerase A	WES	Purcell et al., (2014): A polygenic burden of rare disruptive mutations in schizophrenia. Nature 506:185-190.
PPM1D	protein phosphatase, Mg2+/Mn2+ dependent 1D	methylation	Montano et al.,, (2016): Association of DNA Methylation Differences With Schizophrenia in an Epigenome-Wide Association Study. JAMA Psychiatry 73(5):506-14.
PPM1E	protein phosphatase, Mg2+/Mn2+ dependent 1E	WES	Purcell et al., (2014): A polygenic burden of rare disruptive mutations in schizophrenia. Nature 506:185-190.
PPP1CA	protein phosphatase 1 catalytic subunit alpha	methylation	Montano et al.,, (2016): Association of DNA Methylation Differences With Schizophrenia in an Epigenome-Wide Association Study. JAMA Psychiatry 73(5):506-14.
PPP1CB	protein phosphatase 1 catalytic subunit beta	WES	Purcell et al., (2014): A polygenic burden of rare disruptive mutations in schizophrenia. Nature 506:185-190.
PPP1R12A	protein phosphatase 1 regulatory subunit 12A	WES	Purcell et al., (2014): A polygenic burden of rare disruptive mutations in schizophrenia. Nature 506:185-190.
PPP1R13B	protein phosphatase 1, regulatory subunit 13B	GWAS	Schizophrenia Working Group of the Psychiatric Genomics Consortium, (2014): Biological insights from 108 schizophrenia-associated genetic loci. Nature 511(7510):421-7.
PPP1R13L	protein phosphatase 1 regulatory subunit 13 like	WES	Fromer et al.,, (2014): De novo mutations in schizophrenia implicate synaptic networks. Nature 506(7487):179-84.
PPP1R14D	protein phosphatase 1 regulatory inhibitor subunit 14D	WES	Purcell et al., (2014): A polygenic burden of rare disruptive mutations in schizophrenia. Nature 506:185-190.
PPP1R16B	protein phosphatase 1, regulatory subunit 16B	GWAS	Schizophrenia Working Group of the Psychiatric Genomics Consortium, (2014): Biological insights from 108 schizophrenia-associated genetic loci. Nature 511(7510):421-7.
PPP1R7	protein phosphatase 1 regulatory subunit 7	WES	Purcell et al., (2014): A polygenic burden of rare disruptive mutations in schizophrenia. Nature 506:185-190.
PPP2R1A	protein phosphatase 2 scaffold subunit Aalpha	WES	Purcell et al., (2014): A polygenic burden of rare disruptive mutations in schizophrenia. Nature 506:185-190.
PPP2R2B	protein phosphatase 2, regulatory subunit B, beta	linkage/association studies	Ng et al.,, (2009): Meta-analysis of 32 genome-wide linkage studies of schizophrenia. Mol Psychiatry 14(8):774-85.
PPP2R2C	protein phosphatase 2 regulatory subunit Bgamma	WES	Purcell et al., (2014): A polygenic burden of rare disruptive mutations in schizophrenia. Nature 506:185-190.
PPP2R3A	protein phosphatase 2, regulatory subunit B'', alpha	GWAS	Schizophrenia Working Group of the Psychiatric Genomics Consortium, (2014): Biological insights from 108 schizophrenia-associated genetic loci. Nature 511(7510):421-7.
PPP2R5B	protein phosphatase 2 regulatory subunit B'beta	WES	Purcell et al., (2014): A polygenic burden of rare disruptive mutations in schizophrenia. Nature 506:185-190.
PPP3CA	protein phosphatase 3 catalytic subunit alpha	WES	Purcell et al., (2014): A polygenic burden of rare disruptive mutations in schizophrenia. Nature 506:185-190.
PPP3CB	protein phosphatase 3 catalytic subunit beta	WES	Purcell et al., (2014): A polygenic burden of rare disruptive mutations in schizophrenia. Nature 506:185-190.
PPP3CC	protein phosphatase 3, catalytic subunit, gamma isozyme	linkage/association studies	Allen et al., (2008): Systematic meta-analyses and field synopsis of genetic association studies in schizophrenia: the SzGene database. Nat Genet 40(7):827-34.
PPP4C	protein phosphatase 4, catalytic subunit	GWAS	Schizophrenia Working Group of the Psychiatric Genomics Consortium, (2014): Biological insights from 108 schizophrenia-associated genetic loci. Nature 511(7510):421-7.
PPT2	palmitoyl-protein thioesterase 2	methylation	Montano et al.,, (2016): Association of DNA Methylation Differences With Schizophrenia in an Epigenome-Wide Association Study. JAMA Psychiatry 73(5):506-14.
PRDM11	PR/SET domain 11	methylation	Aberg KA et al., (2014): Methylome-wide association study of schizophrenia: identifying blood biomarker signatures of environmental insults. JAMA Psychiatry 71(3):255-264.
PRDX1	peroxiredoxin 1	WES	Purcell et al., (2014): A polygenic burden of rare disruptive mutations in schizophrenia. Nature 506:185-190.
PRDX2	peroxiredoxin 2	WES	Purcell et al., (2014): A polygenic burden of rare disruptive mutations in schizophrenia. Nature 506:185-190.
PRDX6	peroxiredoxin 6	WES	Purcell et al., (2014): A polygenic burden of rare disruptive mutations in schizophrenia. Nature 506:185-190.
PREX1	phosphatidylinositol-3,4,5-trisphosphate dependent Rac exchange factor 1	WES	Purcell et al., (2014): A polygenic burden of rare disruptive mutations in schizophrenia. Nature 506:185-190.
PREX2	phosphatidylinositol-3,4,5-trisphosphate dependent Rac exchange factor 2	WES	Purcell et al., (2014): A polygenic burden of rare disruptive mutations in schizophrenia. Nature 506:185-190.
PRICKLE2	prickle planar cell polarity protein 2	WES	Purcell et al., (2014): A polygenic burden of rare disruptive mutations in schizophrenia. Nature 506:185-190.
PRKAB2	protein kinase AMP-activated non-catalytic subunit beta 2	CNV-bearing	Luo et al.,, (2014): Systematic prioritization and integrative analysis of copy number variations in schizophrenia reveal key schizophrenia susceptibility genes. Schizophr Bull 40(6):1285-99.
PRKACB	protein kinase cAMP-activated catalytic subunit beta	WES	Purcell et al., (2014): A polygenic burden of rare disruptive mutations in schizophrenia. Nature 506:185-190.
PRKAR1A	protein kinase cAMP-dependent type I regulatory subunit alpha	WES	Purcell et al., (2014): A polygenic burden of rare disruptive mutations in schizophrenia. Nature 506:185-190.
PRKAR2A	protein kinase cAMP-dependent type II regulatory subunit alpha	WES	Purcell et al., (2014): A polygenic burden of rare disruptive mutations in schizophrenia. Nature 506:185-190.
PRKAR2B	protein kinase cAMP-dependent type II regulatory subunit beta	WES	Purcell et al., (2014): A polygenic burden of rare disruptive mutations in schizophrenia. Nature 506:185-190.
PRKCA	protein kinase C, alpha	functional genomics	Ayalew M et al., (2012): Convergent functional genomics of schizophrenia: from comprehensive understanding to genetic risk prediction. Mol Psychiatry 17(9):887-905.
PRKCB	protein kinase C beta	WES	Purcell et al., (2014): A polygenic burden of rare disruptive mutations in schizophrenia. Nature 506:185-190.
PRKCE	protein kinase C epsilon	WES	Purcell et al., (2014): A polygenic burden of rare disruptive mutations in schizophrenia. Nature 506:185-190.
PRKCG	protein kinase C gamma	WES	Purcell et al., (2014): A polygenic burden of rare disruptive mutations in schizophrenia. Nature 506:185-190.
PRKD1	protein kinase D1	GWAS	Schizophrenia Working Group of the Psychiatric Genomics Consortium, (2014): Biological insights from 108 schizophrenia-associated genetic loci. Nature 511(7510):421-7.
PRKD2	protein kinase D2	methylation	Montano et al.,, (2016): Association of DNA Methylation Differences With Schizophrenia in an Epigenome-Wide Association Study. JAMA Psychiatry 73(5):506-14.
PROC	protein C (inactivator of coagulation factors Va and VIIIa)	linkage/association studies	Ng et al.,, (2009): Meta-analysis of 32 genome-wide linkage studies of schizophrenia. Mol Psychiatry 14(8):774-85.
PRODH	proline dehydrogenase (oxidase) 1	linkage/association studies	Lewis et al.,, (2003): Genome scan meta-analysis of schizophrenia and bipolar disorder, part II: Schizophrenia. Am J Hum Genet 73(1):34-48.
PRODH	proline dehydrogenase 1(	CNV-bearing	Luo et al.,, (2014): Systematic prioritization and integrative analysis of copy number variations in schizophrenia reveal key schizophrenia susceptibility genes. Schizophr Bull 40(6):1285-99.
PRPF8	pre-mRNA processing factor 8	WES	Purcell et al., (2014): A polygenic burden of rare disruptive mutations in schizophrenia. Nature 506:185-190.
PRPH	peripherin	WES	Purcell et al., (2014): A polygenic burden of rare disruptive mutations in schizophrenia. Nature 506:185-190.
PRR12	proline rich 12	GWAS	Schizophrenia Working Group of the Psychiatric Genomics Consortium, (2014): Biological insights from 108 schizophrenia-associated genetic loci. Nature 511(7510):421-7.
PRRC2A	proline rich coiled-coil 2A	WES	Fromer et al.,, (2014): De novo mutations in schizophrenia implicate synaptic networks. Nature 506(7487):179-84.
PRRC2C	proline rich coiled-coil 2C	WES	Fromer et al.,, (2014): De novo mutations in schizophrenia implicate synaptic networks. Nature 506(7487):179-84.
PRRG2	proline rich Gla (G-carboxyglutamic acid) 2	GWAS	Schizophrenia Working Group of the Psychiatric Genomics Consortium, (2014): Biological insights from 108 schizophrenia-associated genetic loci. Nature 511(7510):421-7.
PRRT1	proline rich transmembrane protein 1	methylation	Montano et al.,, (2016): Association of DNA Methylation Differences With Schizophrenia in an Epigenome-Wide Association Study. JAMA Psychiatry 73(5):506-14.
PRSS16	protease, serine, 16 (thymus)	GWAS	Schizophrenia Working Group of the Psychiatric Genomics Consortium, (2014): Biological insights from 108 schizophrenia-associated genetic loci. Nature 511(7510):421-7.
PRSS38	protease, serine 38	WES	Fromer et al.,, (2014): De novo mutations in schizophrenia implicate synaptic networks. Nature 506(7487):179-84.
PRUNE2	prune homolog 2	WES	Fromer et al.,, (2014): De novo mutations in schizophrenia implicate synaptic networks. Nature 506(7487):179-84.
PSAP	prosaposin	WES	Fromer et al.,, (2014): De novo mutations in schizophrenia implicate synaptic networks. Nature 506(7487):179-84.
PSAPL1	prosaposin-like 1 (gene/pseudogene)	WES	Fromer et al.,, (2014): De novo mutations in schizophrenia implicate synaptic networks. Nature 506(7487):179-84.
PSD	pleckstrin and Sec7 domain containing	WES	Purcell et al., (2014): A polygenic burden of rare disruptive mutations in schizophrenia. Nature 506:185-190.
PSD3	pleckstrin and Sec7 domain containing 3	WES	Purcell et al., (2014): A polygenic burden of rare disruptive mutations in schizophrenia. Nature 506:185-190.
PSG2	pregnancy specific beta-1-glycoprotein 2	WES	Purcell et al., (2014): A polygenic burden of rare disruptive mutations in schizophrenia. Nature 506:185-190.
PSKH1	protein serine kinase H1	GWAS	Schizophrenia Working Group of the Psychiatric Genomics Consortium, (2014): Biological insights from 108 schizophrenia-associated genetic loci. Nature 511(7510):421-7.
PSMA4	proteasome (prosome, macropain) subunit, alpha type, 4	GWAS	Schizophrenia Working Group of the Psychiatric Genomics Consortium, (2014): Biological insights from 108 schizophrenia-associated genetic loci. Nature 511(7510):421-7.
PSMB10	proteasome (prosome, macropain) subunit, beta type, 10	GWAS	Schizophrenia Working Group of the Psychiatric Genomics Consortium, (2014): Biological insights from 108 schizophrenia-associated genetic loci. Nature 511(7510):421-7.
PSMB11	proteasome subunit beta 11	WES	Fromer et al.,, (2014): De novo mutations in schizophrenia implicate synaptic networks. Nature 506(7487):179-84.
PSMB8	proteasome subunit beta 8	methylation	Montano et al.,, (2016): Association of DNA Methylation Differences With Schizophrenia in an Epigenome-Wide Association Study. JAMA Psychiatry 73(5):506-14.
PSMD2	proteasome 26S subunit, non-ATPase 2	WES	Fromer et al.,, (2014): De novo mutations in schizophrenia implicate synaptic networks. Nature 506(7487):179-84.
PSMD6	proteasome (prosome, macropain) 26S subunit, non-ATPase, 6	GWAS	Schizophrenia Working Group of the Psychiatric Genomics Consortium, (2014): Biological insights from 108 schizophrenia-associated genetic loci. Nature 511(7510):421-7.
PSPC1	paraspeckle component 1	WES	Fromer et al.,, (2014): De novo mutations in schizophrenia implicate synaptic networks. Nature 506(7487):179-84.
PTAFR	platelet activating factor receptor	WES	Fromer et al.,, (2014): De novo mutations in schizophrenia implicate synaptic networks. Nature 506(7487):179-84.
PTCH1	patched 1	WES	Purcell et al., (2014): A polygenic burden of rare disruptive mutations in schizophrenia. Nature 506:185-190.
PTEN	phosphatase and tensin homolog	WES	Purcell et al., (2014): A polygenic burden of rare disruptive mutations in schizophrenia. Nature 506:185-190.
PTGIS	prostaglandin I2 (prostacyclin) synthase	GWAS	Schizophrenia Working Group of the Psychiatric Genomics Consortium, (2014): Biological insights from 108 schizophrenia-associated genetic loci. Nature 511(7510):421-7.
PTK2	protein tyrosine kinase 2	WES	Purcell et al., (2014): A polygenic burden of rare disruptive mutations in schizophrenia. Nature 506:185-190.
PTK2B	protein tyrosine kinase 2 beta	WES	Fromer et al.,, (2014): De novo mutations in schizophrenia implicate synaptic networks. Nature 506(7487):179-84.
PTN	pleiotrophin	GWAS	Schizophrenia Working Group of the Psychiatric Genomics Consortium, (2014): Biological insights from 108 schizophrenia-associated genetic loci. Nature 511(7510):421-7.
PTPN11	protein tyrosine phosphatase, non-receptor type 11	WES	Purcell et al., (2014): A polygenic burden of rare disruptive mutations in schizophrenia. Nature 506:185-190.
PTPN23	protein tyrosine phosphatase, non-receptor type 23	WES	Purcell et al., (2014): A polygenic burden of rare disruptive mutations in schizophrenia. Nature 506:185-190.
PTPN3	protein tyrosine phosphatase, non-receptor type 3	WES	Fromer et al.,, (2014): De novo mutations in schizophrenia implicate synaptic networks. Nature 506(7487):179-84.
PTPN5	protein tyrosine phosphatase, non-receptor type 5	WES	Purcell et al., (2014): A polygenic burden of rare disruptive mutations in schizophrenia. Nature 506:185-190.
PTPRD	protein tyrosine phosphatase, receptor type D	WES	Purcell et al., (2014): A polygenic burden of rare disruptive mutations in schizophrenia. Nature 506:185-190.
PTPRF	protein tyrosine phosphatase, receptor type, F	GWAS	Schizophrenia Working Group of the Psychiatric Genomics Consortium, (2014): Biological insights from 108 schizophrenia-associated genetic loci. Nature 511(7510):421-7.
PTPRG	protein tyrosine phosphatase, receptor type G	WES	Fromer et al.,, (2014): De novo mutations in schizophrenia implicate synaptic networks. Nature 506(7487):179-84.
PTPRJ	protein tyrosine phosphatase, receptor type J	WES	Fromer et al.,, (2014): De novo mutations in schizophrenia implicate synaptic networks. Nature 506(7487):179-84.
PTPRM	protein tyrosine phosphatase, receptor type M	WES	Purcell et al., (2014): A polygenic burden of rare disruptive mutations in schizophrenia. Nature 506:185-190.
PTPRN2	protein tyrosine phosphatase, receptor type N2	WES	Purcell et al., (2014): A polygenic burden of rare disruptive mutations in schizophrenia. Nature 506:185-190.
PTPRS	protein tyrosine phosphatase, receptor type S	WES	Purcell et al., (2014): A polygenic burden of rare disruptive mutations in schizophrenia. Nature 506:185-190.
PTPRT	protein tyrosine phosphatase, receptor type T	WES	Purcell et al., (2014): A polygenic burden of rare disruptive mutations in schizophrenia. Nature 506:185-190.
PTPRZ1	protein tyrosine phosphatase, receptor-type, Z polypeptide 1	linkage/association studies	Lewis et al.,, (2003): Genome scan meta-analysis of schizophrenia and bipolar disorder, part II: Schizophrenia. Am J Hum Genet 73(1):34-48.
PUF60	poly	methylation	Montano et al.,, (2016): Association of DNA Methylation Differences With Schizophrenia in an Epigenome-Wide Association Study. JAMA Psychiatry 73(5):506-14.
PUM1	pumilio RNA binding family member 1	WES	Purcell et al., (2014): A polygenic burden of rare disruptive mutations in schizophrenia. Nature 506:185-190.
PUM2	pumilio RNA binding family member 2	WES	Purcell et al., (2014): A polygenic burden of rare disruptive mutations in schizophrenia. Nature 506:185-190.
PURA	purine rich element binding protein A	WES	Purcell et al., (2014): A polygenic burden of rare disruptive mutations in schizophrenia. Nature 506:185-190.
PUS7	pseudouridylate synthase 7 (putative)	GWAS	Schizophrenia Working Group of the Psychiatric Genomics Consortium, (2014): Biological insights from 108 schizophrenia-associated genetic loci. Nature 511(7510):421-7.
PWWP2B	PWWP domain containing 2B	methylation	Montano et al.,, (2016): Association of DNA Methylation Differences With Schizophrenia in an Epigenome-Wide Association Study. JAMA Psychiatry 73(5):506-14.
PXDC1	PX domain containing 1	methylation	Montano et al.,, (2016): Association of DNA Methylation Differences With Schizophrenia in an Epigenome-Wide Association Study. JAMA Psychiatry 73(5):506-14.
PYCARD	PYD and CARD domain containing	WES	Fromer et al.,, (2014): De novo mutations in schizophrenia implicate synaptic networks. Nature 506(7487):179-84.
PYCRL	pyrroline-5-carboxylate reductase-like	WES	Purcell et al., (2014): A polygenic burden of rare disruptive mutations in schizophrenia. Nature 506:185-190.
PYGB	phosphorylase, glycogen; brain	WES	Purcell et al., (2014): A polygenic burden of rare disruptive mutations in schizophrenia. Nature 506:185-190.
QPCT	glutaminyl-peptide cyclotransferase	GWAS	Ripke et al.,, (2013): Genome-wide association analysis identifies 13 new risk loci for schizophrenia. Nat Genet 45(10):1150-9.
R3HDM1	R3H domain containing 1	WES	Purcell et al., (2014): A polygenic burden of rare disruptive mutations in schizophrenia. Nature 506:185-190.
R3HDM2	R3H domain containing 2	GWAS	Schizophrenia Working Group of the Psychiatric Genomics Consortium, (2014): Biological insights from 108 schizophrenia-associated genetic loci. Nature 511(7510):421-7.
RAB13	RAB13, member RAS oncogene family	WES	Purcell et al., (2014): A polygenic burden of rare disruptive mutations in schizophrenia. Nature 506:185-190.
RAB15	RAB15, member RAS oncogene family	WES	Purcell et al., (2014): A polygenic burden of rare disruptive mutations in schizophrenia. Nature 506:185-190.
RAB18	RAB18, member RAS oncogene family	functional genomics	Ayalew M et al., (2012): Convergent functional genomics of schizophrenia: from comprehensive understanding to genetic risk prediction. Mol Psychiatry 17(9):887-905.
RAB1A	RAB1A, member RAS oncogene family	WES	Purcell et al., (2014): A polygenic burden of rare disruptive mutations in schizophrenia. Nature 506:185-190.
RAB1B	RAB1B, member RAS oncogene family	WES	Purcell et al., (2014): A polygenic burden of rare disruptive mutations in schizophrenia. Nature 506:185-190.
RAB35	RAB35, member RAS oncogene family	WES	Purcell et al., (2014): A polygenic burden of rare disruptive mutations in schizophrenia. Nature 506:185-190.
RAB3A	RAB3A, member RAS oncogene family	WES	Purcell et al., (2014): A polygenic burden of rare disruptive mutations in schizophrenia. Nature 506:185-190.
RAB3GAP2	RAB3 GTPase activating non-catalytic protein subunit 2	WES	Purcell et al., (2014): A polygenic burden of rare disruptive mutations in schizophrenia. Nature 506:185-190.
RAB5B	RAB5B, member RAS oncogene family	WES	Purcell et al., (2014): A polygenic burden of rare disruptive mutations in schizophrenia. Nature 506:185-190.
RAB5C	RAB5C, member RAS oncogene family	WES	Purcell et al., (2014): A polygenic burden of rare disruptive mutations in schizophrenia. Nature 506:185-190.
RAB6A	RAB6A, member RAS oncogene family	WES	Purcell et al., (2014): A polygenic burden of rare disruptive mutations in schizophrenia. Nature 506:185-190.
RAB6B	RAB6B, member RAS oncogene family	WES	Purcell et al., (2014): A polygenic burden of rare disruptive mutations in schizophrenia. Nature 506:185-190.
RAB7A	RAB7A, member RAS oncogene family	WES	Purcell et al., (2014): A polygenic burden of rare disruptive mutations in schizophrenia. Nature 506:185-190.
RAC1	ras-related C3 botulinum toxin substrate 1 (rho family, small GTP binding protein Rac1)	WES	Purcell et al., (2014): A polygenic burden of rare disruptive mutations in schizophrenia. Nature 506:185-190.
RAD51B	RAD51 paralog B	methylation	Montano et al.,, (2016): Association of DNA Methylation Differences With Schizophrenia in an Epigenome-Wide Association Study. JAMA Psychiatry 73(5):506-14.
RAD54L2	RAD54-like 2 (S. cerevisiae)	WES	Fromer et al.,, (2014): De novo mutations in schizophrenia implicate synaptic networks. Nature 506(7487):179-84.
RAI1	retinoic acid induced 1	GWAS	Schizophrenia Working Group of the Psychiatric Genomics Consortium, (2014): Biological insights from 108 schizophrenia-associated genetic loci. Nature 511(7510):421-7.
RALA	RALA Ras like proto-oncogene A	WES	Purcell et al., (2014): A polygenic burden of rare disruptive mutations in schizophrenia. Nature 506:185-190.
RALGAPA1	Ral GTPase activating protein catalytic alpha subunit 1	WES	Purcell et al., (2014): A polygenic burden of rare disruptive mutations in schizophrenia. Nature 506:185-190.
RALGAPB	Ral GTPase activating protein non-catalytic beta subunit	WES	Purcell et al., (2014): A polygenic burden of rare disruptive mutations in schizophrenia. Nature 506:185-190.
RALGDS	ral guanine nucleotide dissociation stimulator	WES	Purcell et al., (2014): A polygenic burden of rare disruptive mutations in schizophrenia. Nature 506:185-190.
RANBP1	RAN binding protein 1	linkage/association studies	Lewis et al.,, (2003): Genome scan meta-analysis of schizophrenia and bipolar disorder, part II: Schizophrenia. Am J Hum Genet 73(1):34-48.
RANBP10	RAN binding protein 10	GWAS	Schizophrenia Working Group of the Psychiatric Genomics Consortium, (2014): Biological insights from 108 schizophrenia-associated genetic loci. Nature 511(7510):421-7.
RANBP3L	RAN binding protein 3 like	methylation	Montano et al.,, (2016): Association of DNA Methylation Differences With Schizophrenia in an Epigenome-Wide Association Study. JAMA Psychiatry 73(5):506-14.
RANBP6	RAN binding protein 6	WES	Fromer et al.,, (2014): De novo mutations in schizophrenia implicate synaptic networks. Nature 506(7487):179-84.
RANGAP1	Ran GTPase activating protein 1	GWAS	Schizophrenia Working Group of the Psychiatric Genomics Consortium, (2014): Biological insights from 108 schizophrenia-associated genetic loci. Nature 511(7510):421-7.
RAP1A	RAP1A, member of RAS oncogene family	WES	Purcell et al., (2014): A polygenic burden of rare disruptive mutations in schizophrenia. Nature 506:185-190.
RAP1GAP	RAP1 GTPase activating protein	WES	Purcell et al., (2014): A polygenic burden of rare disruptive mutations in schizophrenia. Nature 506:185-190.
RAP1GAP2	RAP1 GTPase activating protein 2	methylation	Aberg KA et al., (2014): Methylome-wide association study of schizophrenia: identifying blood biomarker signatures of environmental insults. JAMA Psychiatry 71(3):255-264.
RAP1GDS1	Rap1 GTPase-GDP dissociation stimulator 1	WES	Purcell et al., (2014): A polygenic burden of rare disruptive mutations in schizophrenia. Nature 506:185-190.
RAPGEF1	Rap guanine nucleotide exchange factor 1	WES	Purcell et al., (2014): A polygenic burden of rare disruptive mutations in schizophrenia. Nature 506:185-190.
RAPGEF2	Rap guanine nucleotide exchange factor 2	WES	Purcell et al., (2014): A polygenic burden of rare disruptive mutations in schizophrenia. Nature 506:185-190.
RAPGEF4	Rap guanine nucleotide exchange factor 4	WES	Purcell et al., (2014): A polygenic burden of rare disruptive mutations in schizophrenia. Nature 506:185-190.
RAPGEF6	Rap guanine nucleotide exchange factor (GEF) 6	linkage/association studies	Lewis et al.,, (2003): Genome scan meta-analysis of schizophrenia and bipolar disorder, part II: Schizophrenia. Am J Hum Genet 73(1):34-48.
RAPGEFL1	Rap guanine nucleotide exchange factor like 1	WES	Purcell et al., (2014): A polygenic burden of rare disruptive mutations in schizophrenia. Nature 506:185-190.
RARG	retinoic acid receptor gamma	WES	Purcell et al., (2014): A polygenic burden of rare disruptive mutations in schizophrenia. Nature 506:185-190.
RASGRF1	Ras protein specific guanine nucleotide releasing factor 1	WES	Purcell et al., (2014): A polygenic burden of rare disruptive mutations in schizophrenia. Nature 506:185-190.
RASGRP1	RAS guanyl releasing protein 1	WES	Purcell et al., (2014): A polygenic burden of rare disruptive mutations in schizophrenia. Nature 506:185-190.
RASSF2	Ras association domain family member 2	methylation	Aberg KA et al., (2014): Methylome-wide association study of schizophrenia: identifying blood biomarker signatures of environmental insults. JAMA Psychiatry 71(3):255-264.
RASSF5	Ras association domain family member 5	WES	Fromer et al.,, (2014): De novo mutations in schizophrenia implicate synaptic networks. Nature 506(7487):179-84.
RB1CC1	RB1 inducible coiled-coil 1	WES	Purcell et al., (2014): A polygenic burden of rare disruptive mutations in schizophrenia. Nature 506:185-190.
RBFOX1	RNA binding protein, fox-1 homolog 1	CNV-bearing	Luo et al.,, (2014): Systematic prioritization and integrative analysis of copy number variations in schizophrenia reveal key schizophrenia susceptibility genes. Schizophr Bull 40(6):1285-99.
RBMS3	RNA binding motif single stranded interacting protein 3	methylation	Aberg KA et al., (2014): Methylome-wide association study of schizophrenia: identifying blood biomarker signatures of environmental insults. JAMA Psychiatry 71(3):255-264.
RBX1	ring-box 1	WES	Purcell et al., (2014): A polygenic burden of rare disruptive mutations in schizophrenia. Nature 506:185-190.
RC3H1	ring finger and CCCH-type domains 1	WES	Purcell et al., (2014): A polygenic burden of rare disruptive mutations in schizophrenia. Nature 506:185-190.
RC3H2	ring finger and CCCH-type domains 2	WES	Purcell et al., (2014): A polygenic burden of rare disruptive mutations in schizophrenia. Nature 506:185-190.
[truncated: 690 more rows]
